# Supplementary material for: Introduction of a clean and promising protocol for the synthesis of β-amino-acrylates and 1,4-benzoheterocycles: an emerging innovation
Source: Royal Society of Chemistry journal article supplement (doi:10.1039/c1gc15701a), 2011-01-01

**Introduction of a clean and promising protocol for the synthesis of  
 $\beta$ -amino acrylates and 1,4-benzoheterocycles:  
An emerging innovation**

Garima Choudhary and Rama Krishna Peddinti\*

*Department of Chemistry, Indian Institute of Technology, Roorkee 247 667,  
Uttarakhand, India*

---

***Supplementary Information (File-2)***

---

Copies of  $^1\text{H}$  (500 MHz) and  $^{13}\text{C}$  NMR (125 MHz) spectra: Pages SI-21–SI-68

Copies of NMR spectra of product from 4-chloroaminophenol and DEAD  
: Page SI-69

Copies of NMR spectra of **12a** (in TFA), **23a** (in TFA/ $\text{CF}_3\text{CO}_2\text{D}$ )  
: Pages SI-70–SI-71

Copies of 2D NMR spectra of **23a** and **23b** : Page SI-72

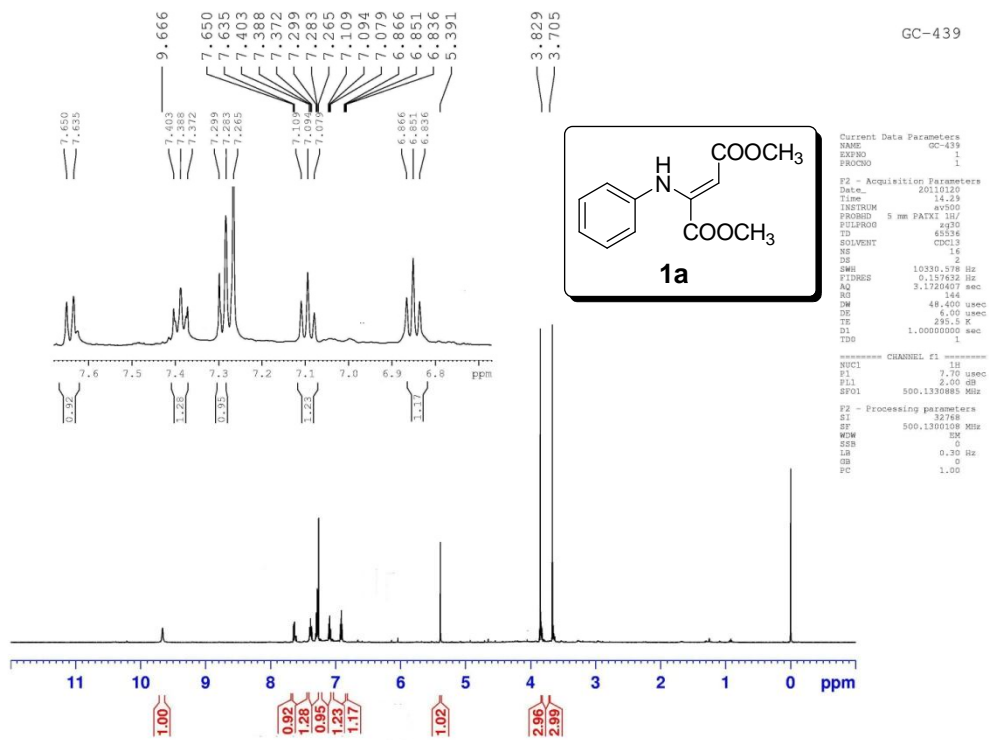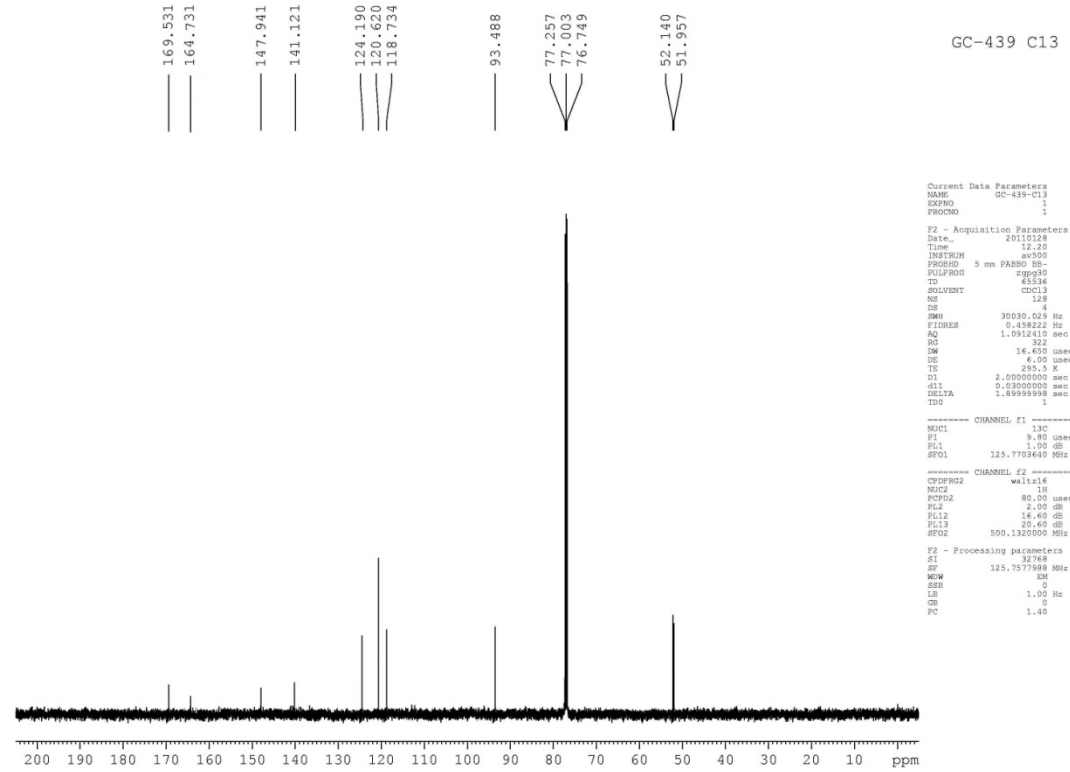

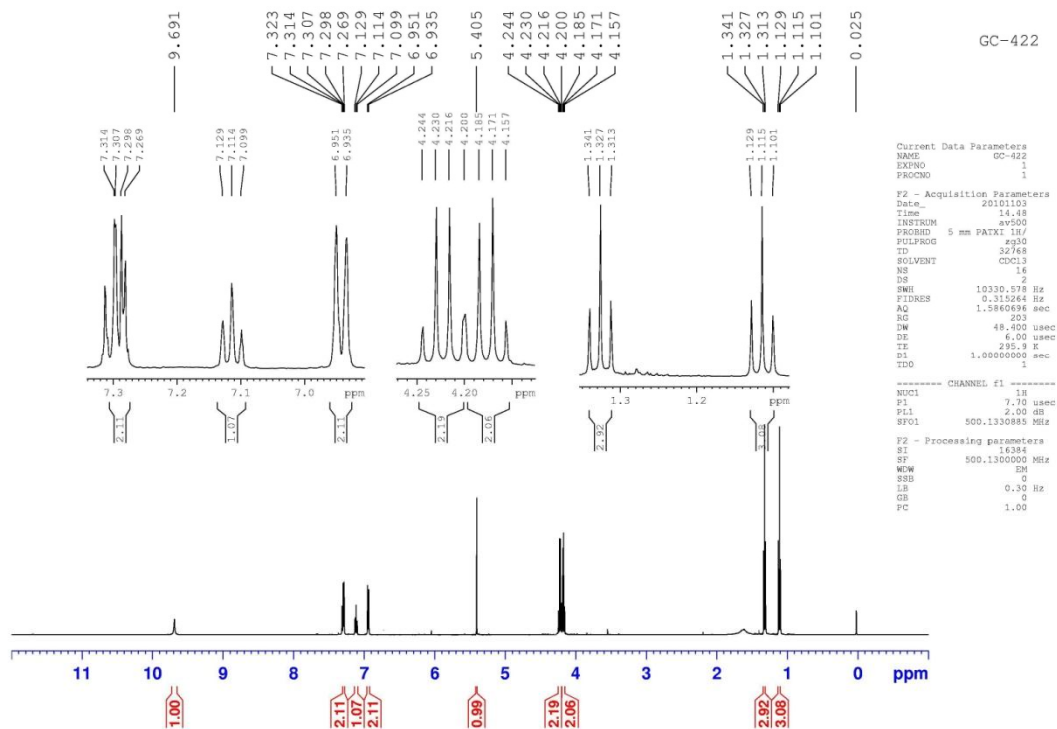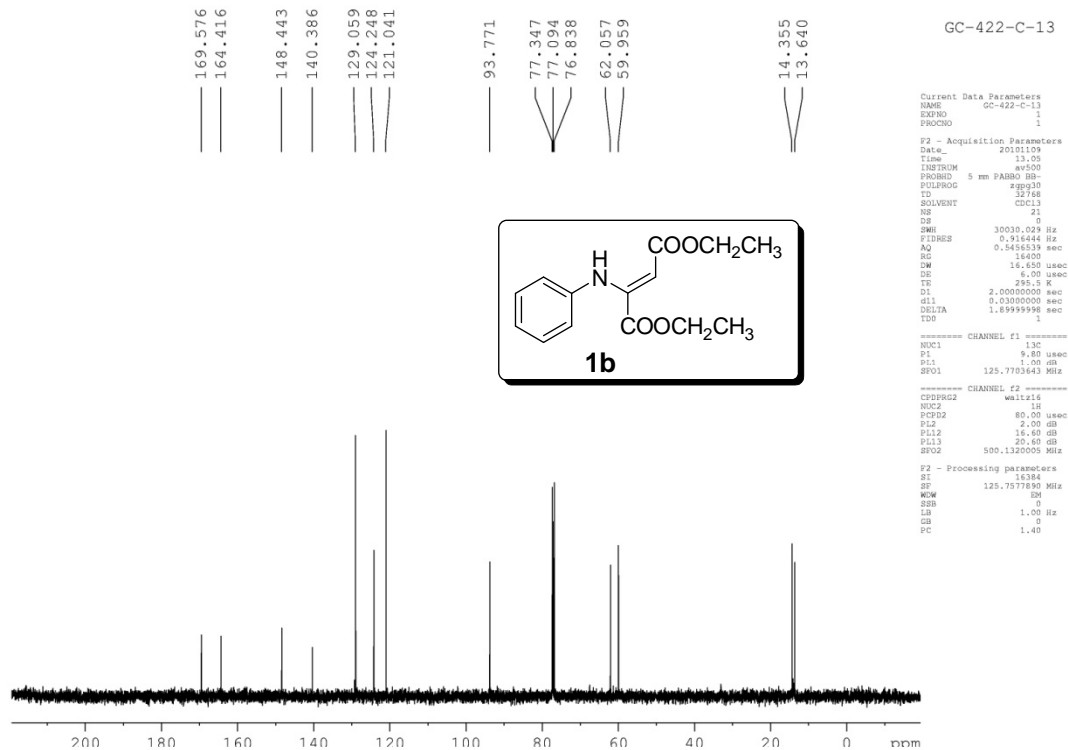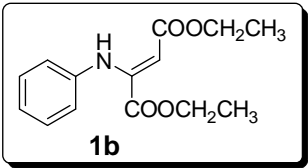

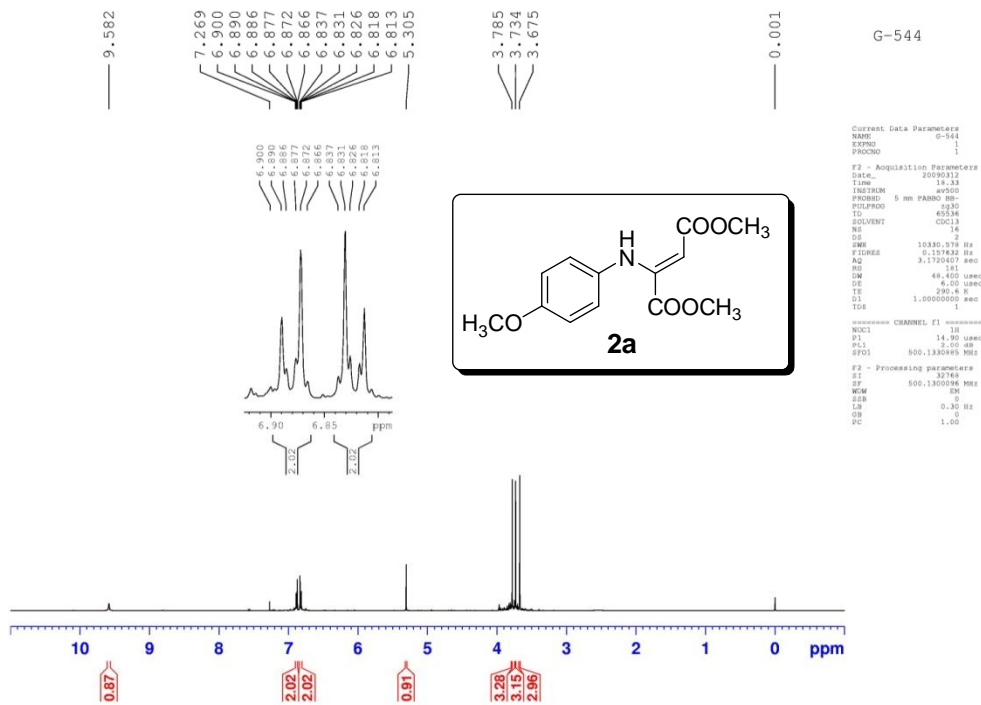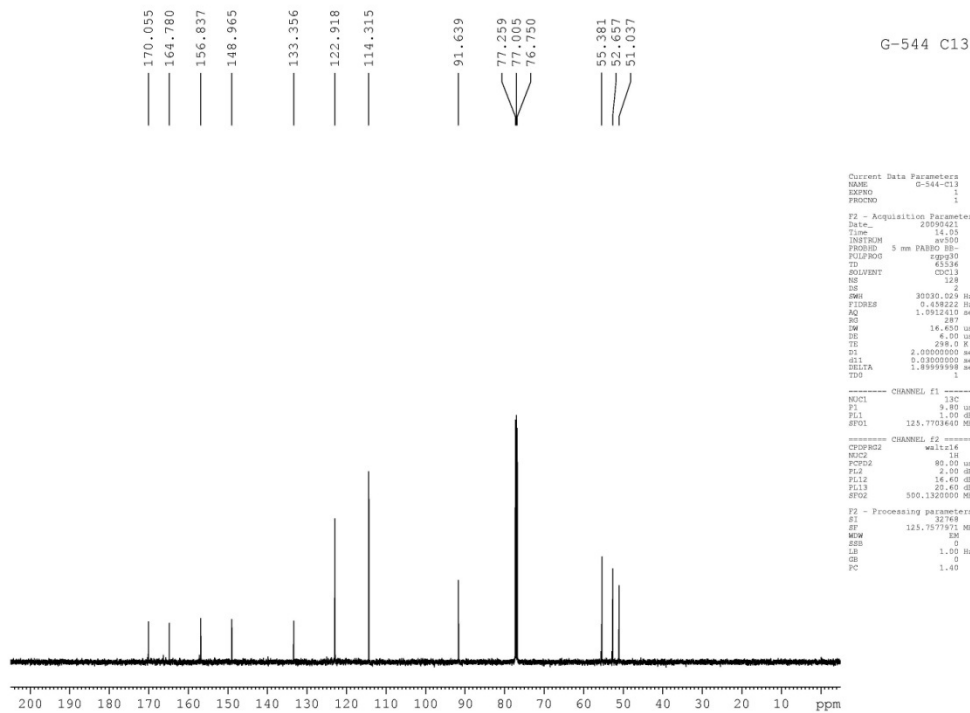

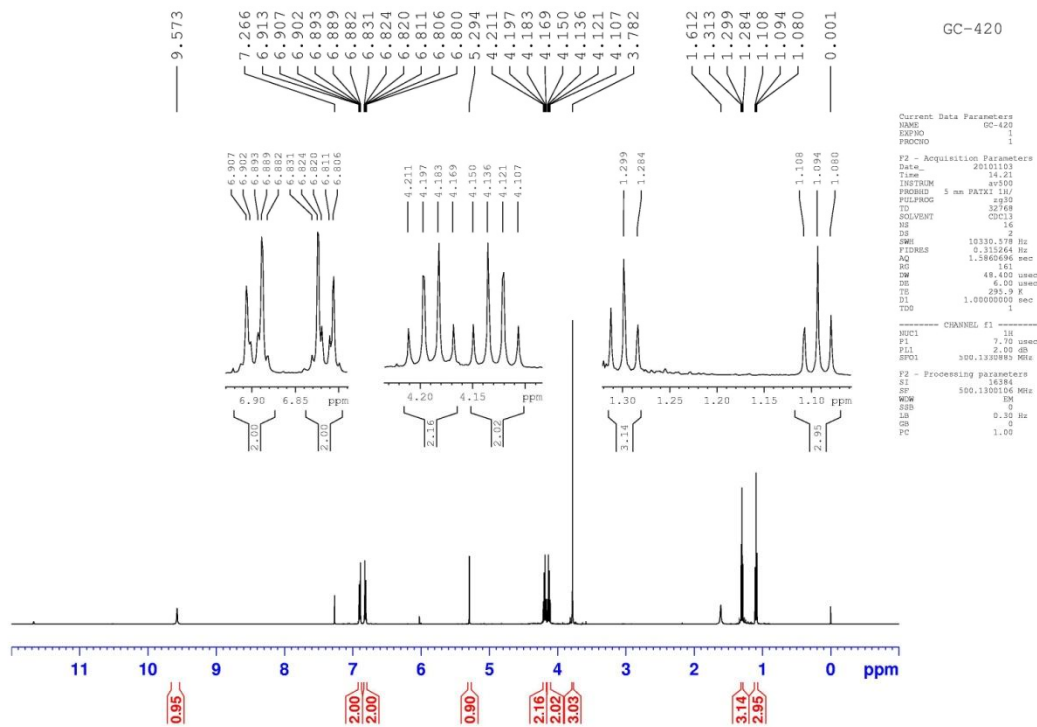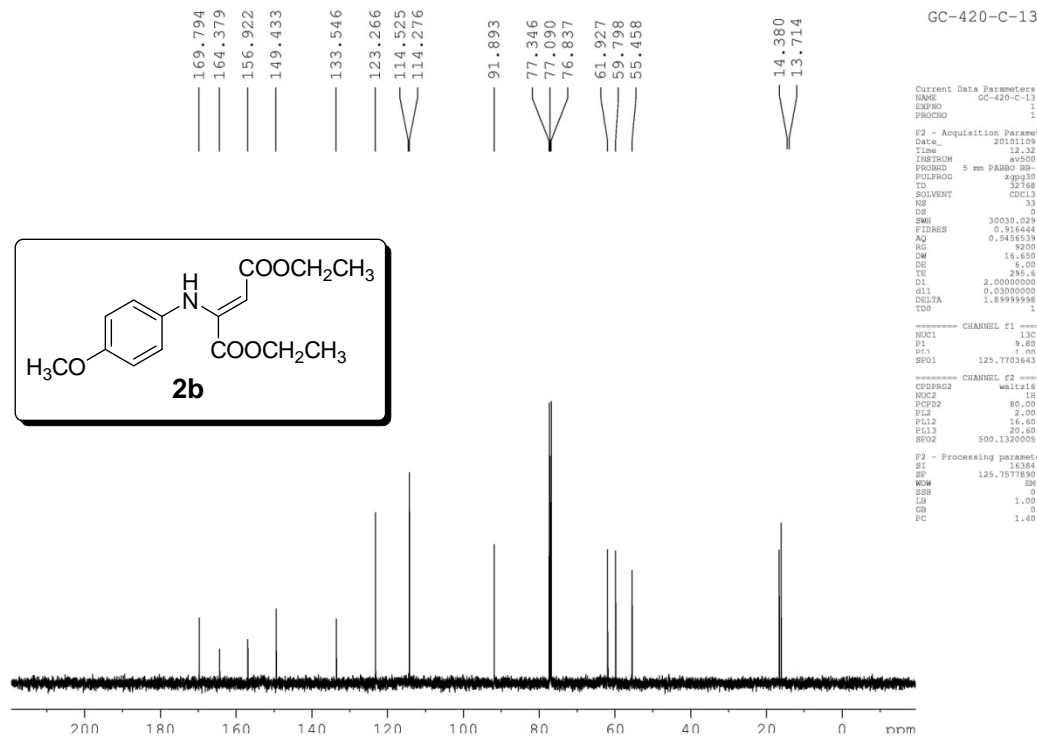

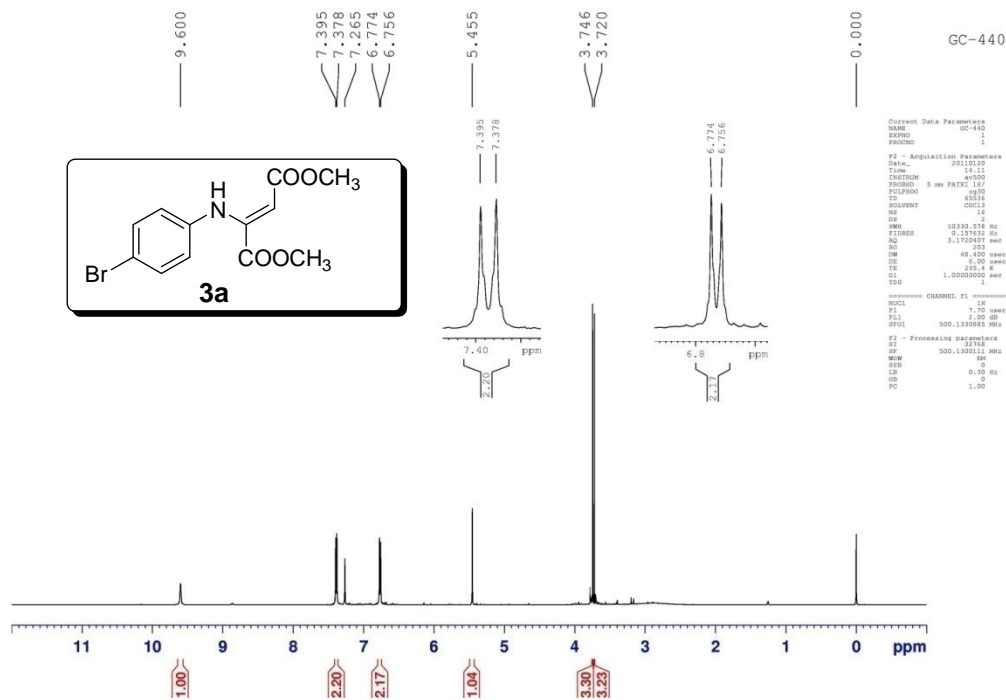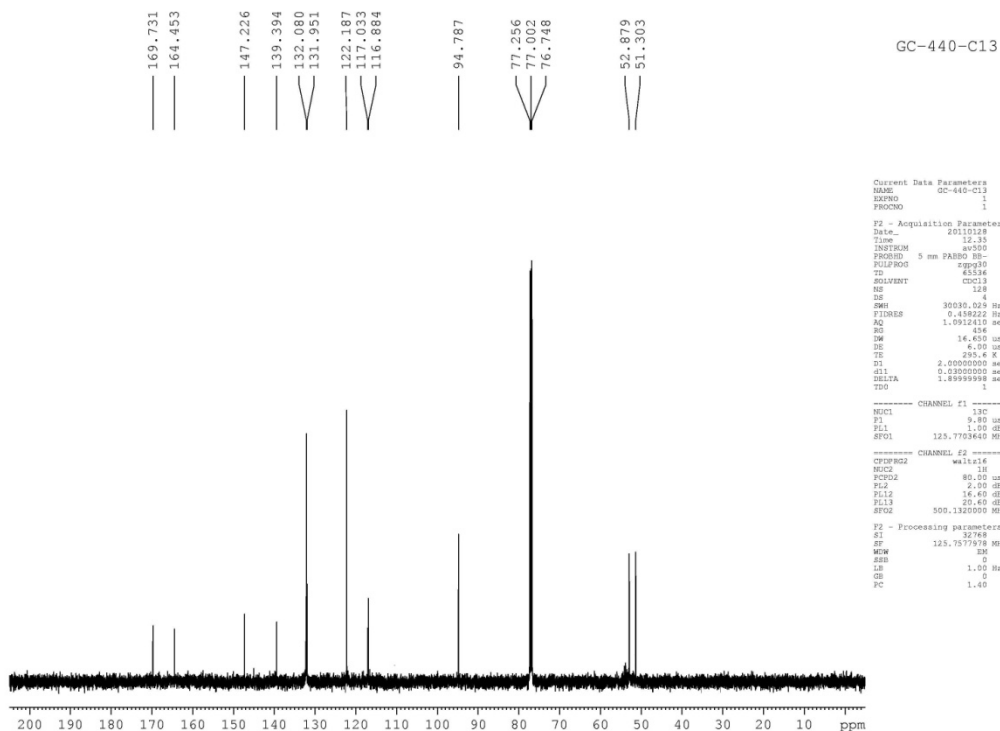

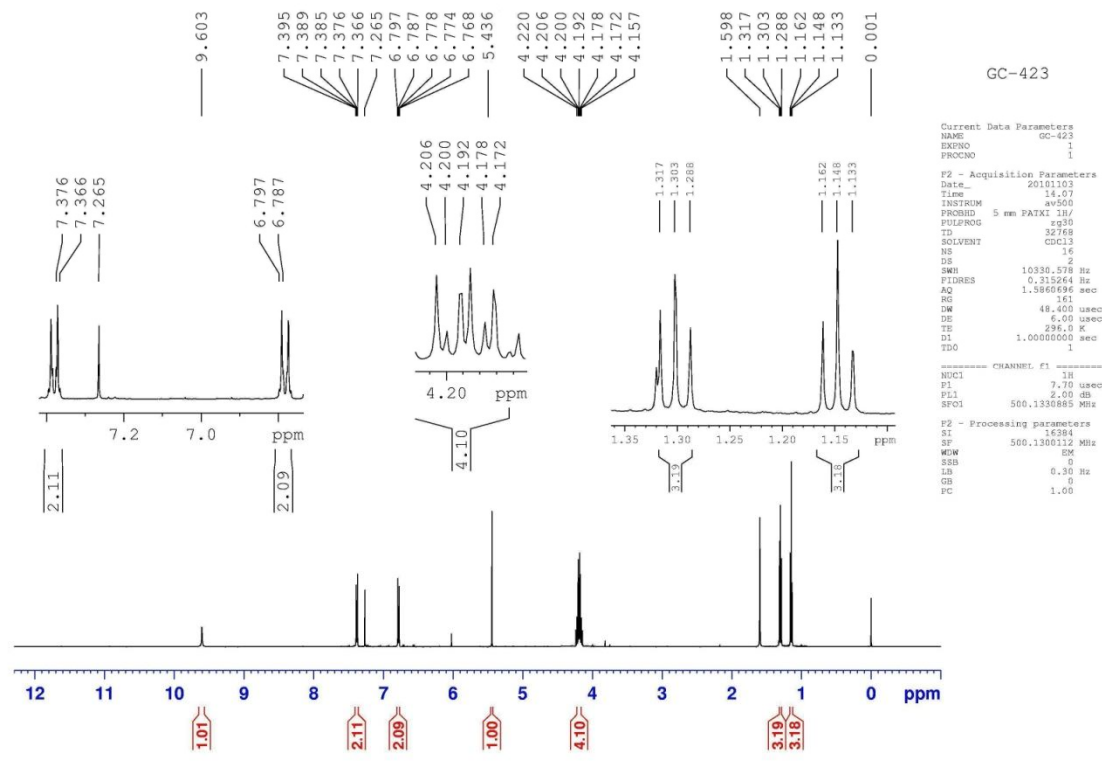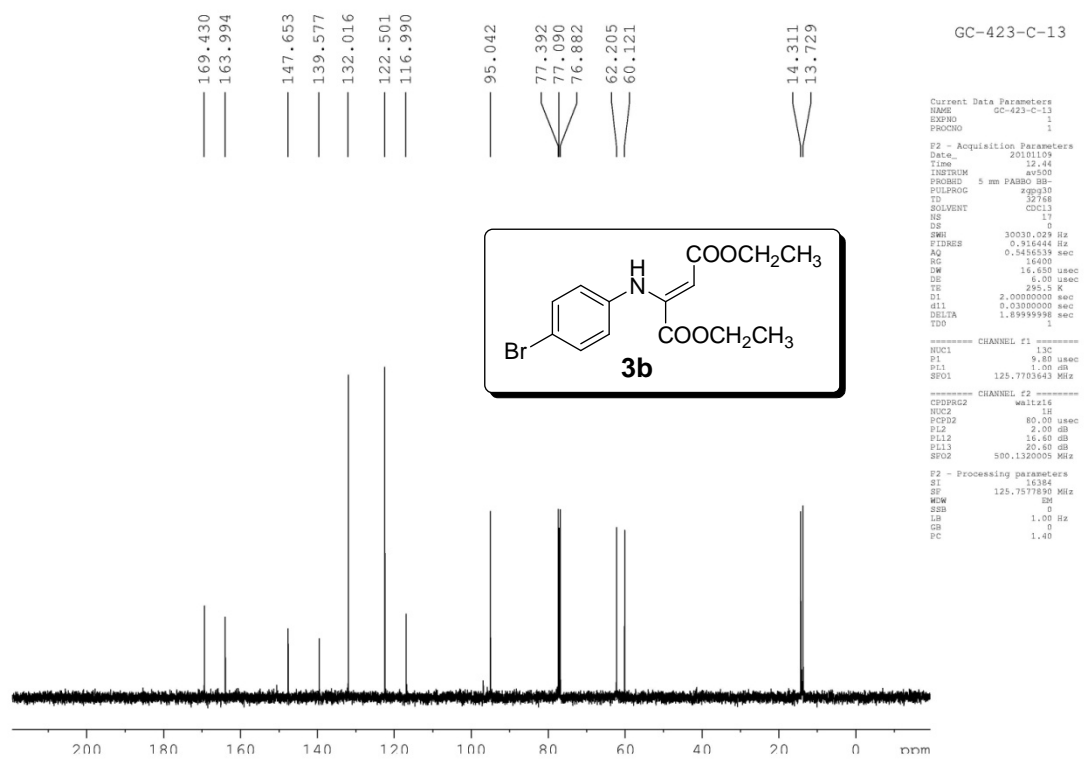

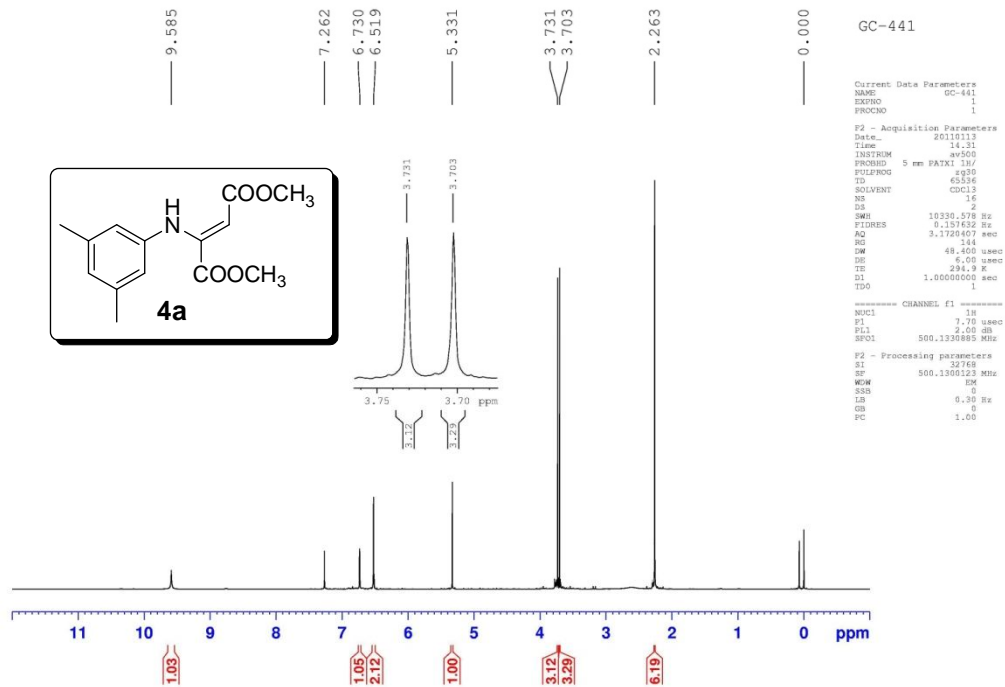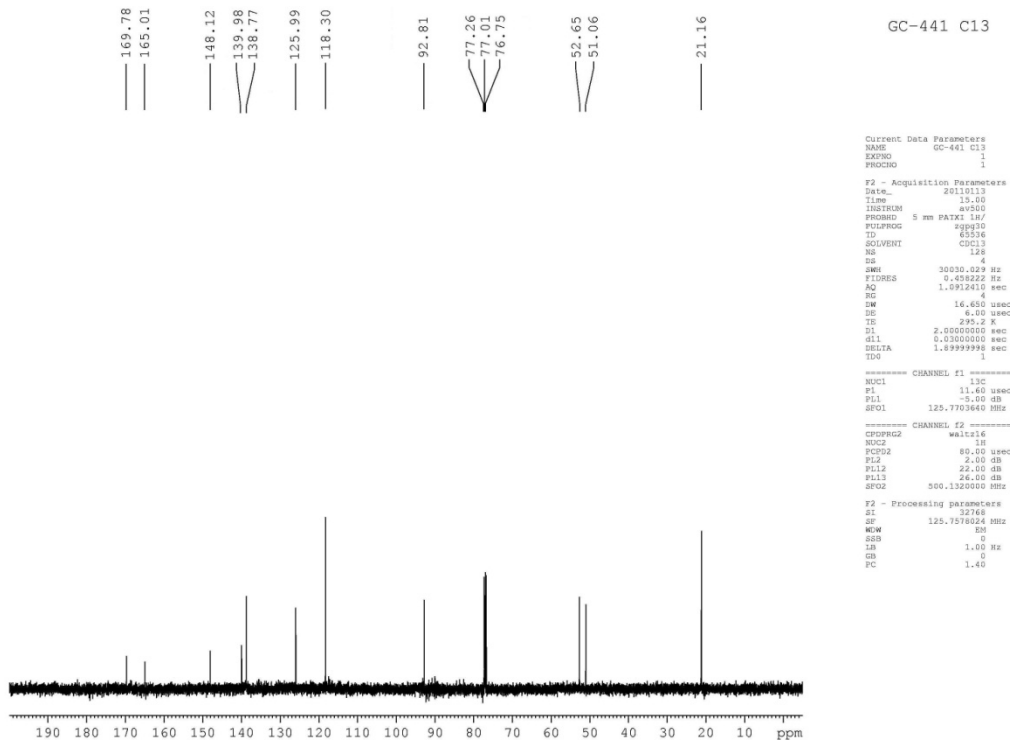

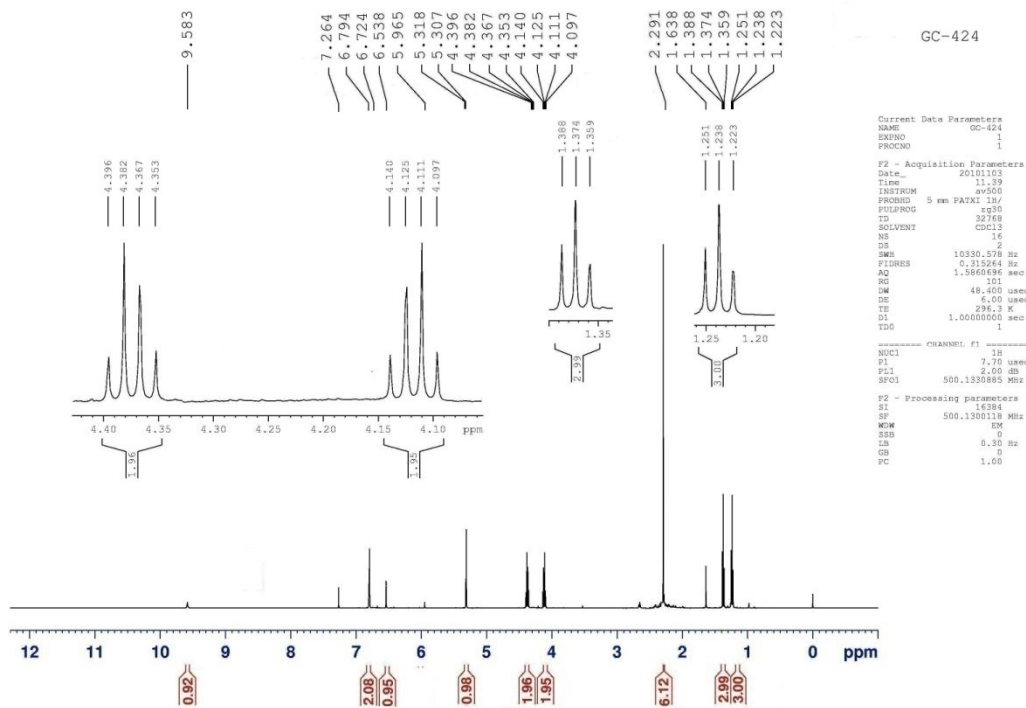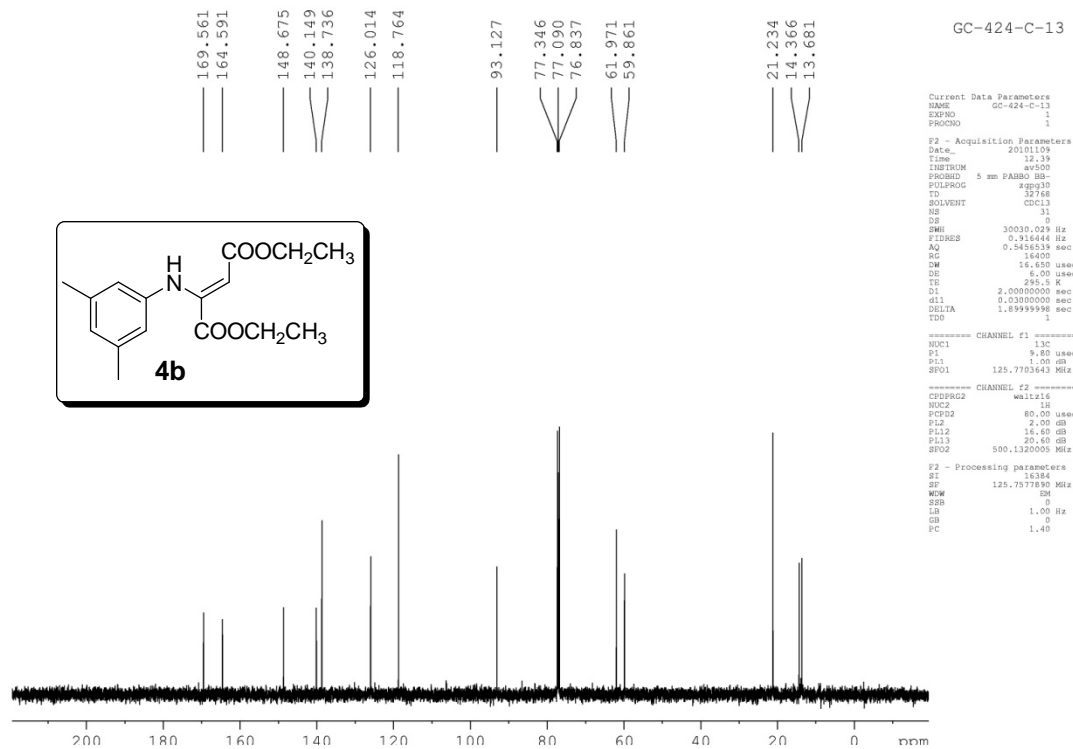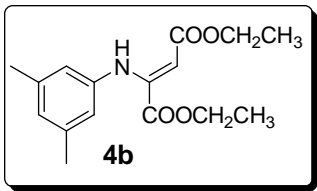

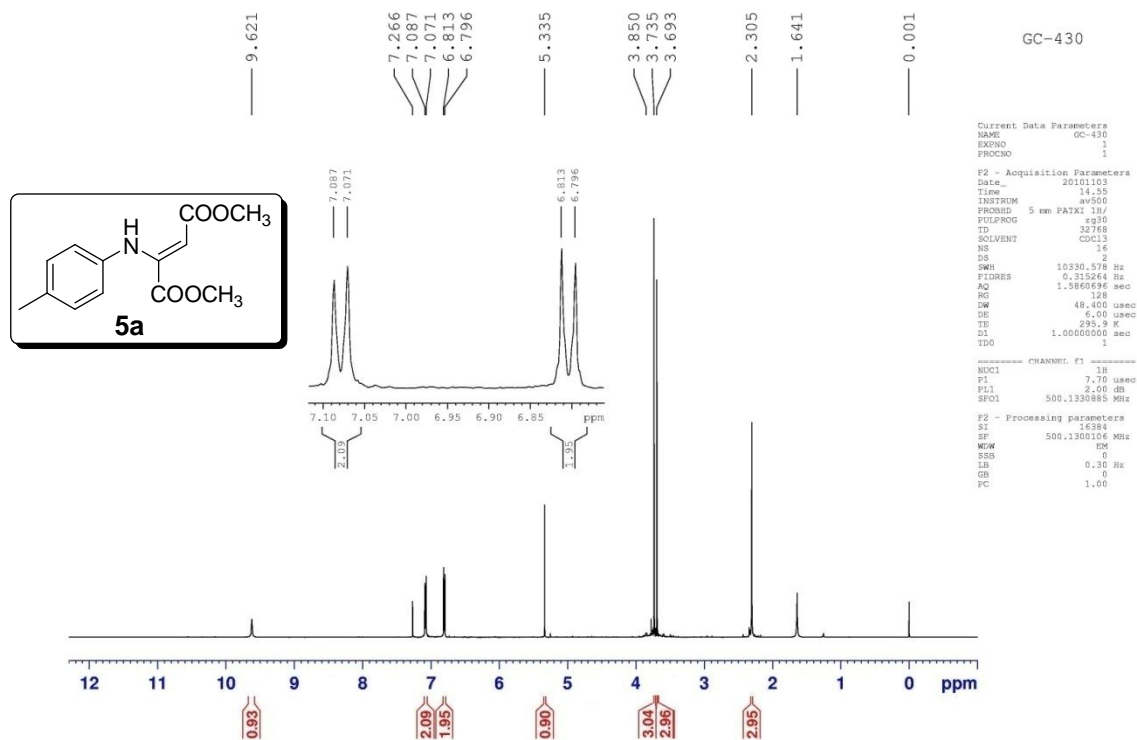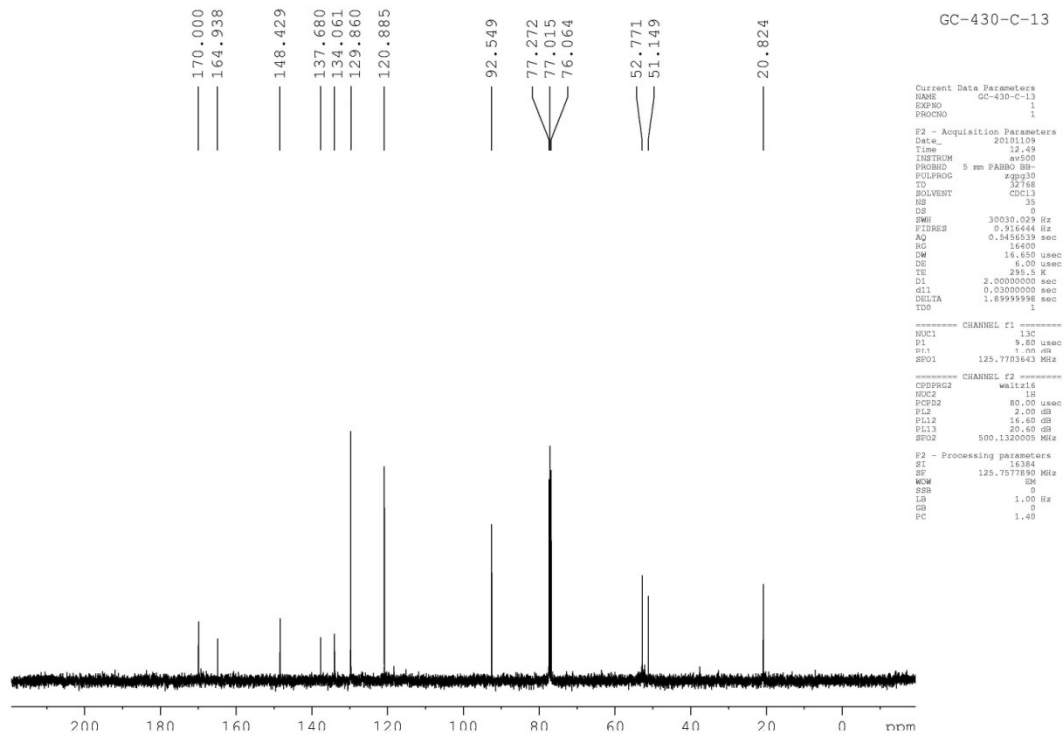

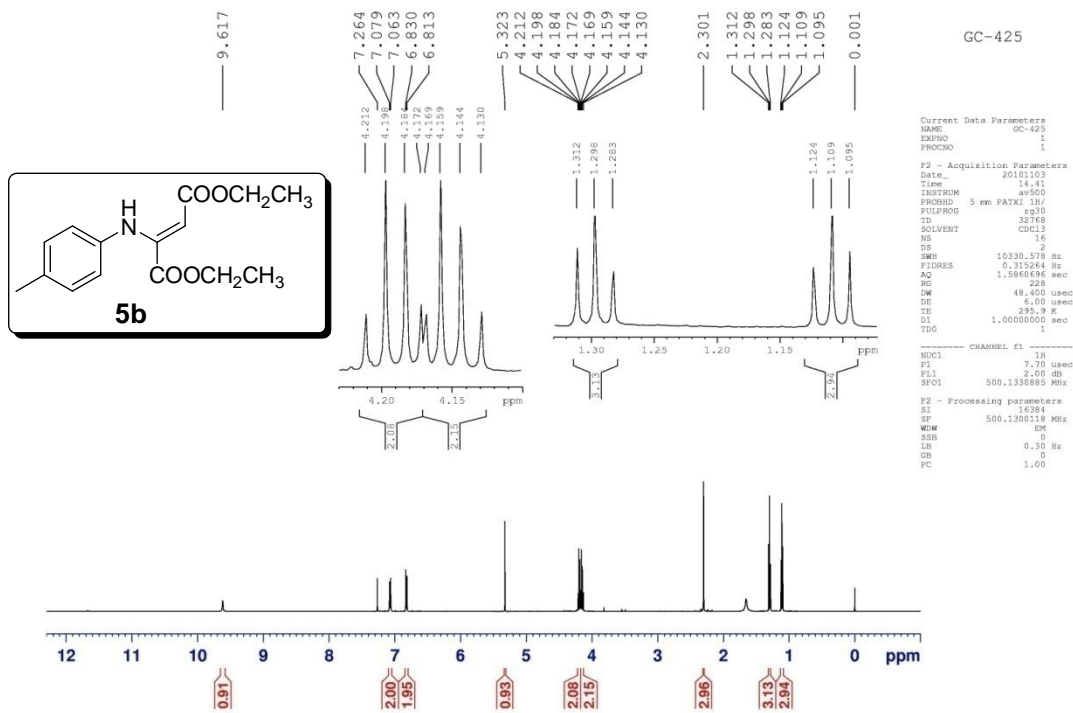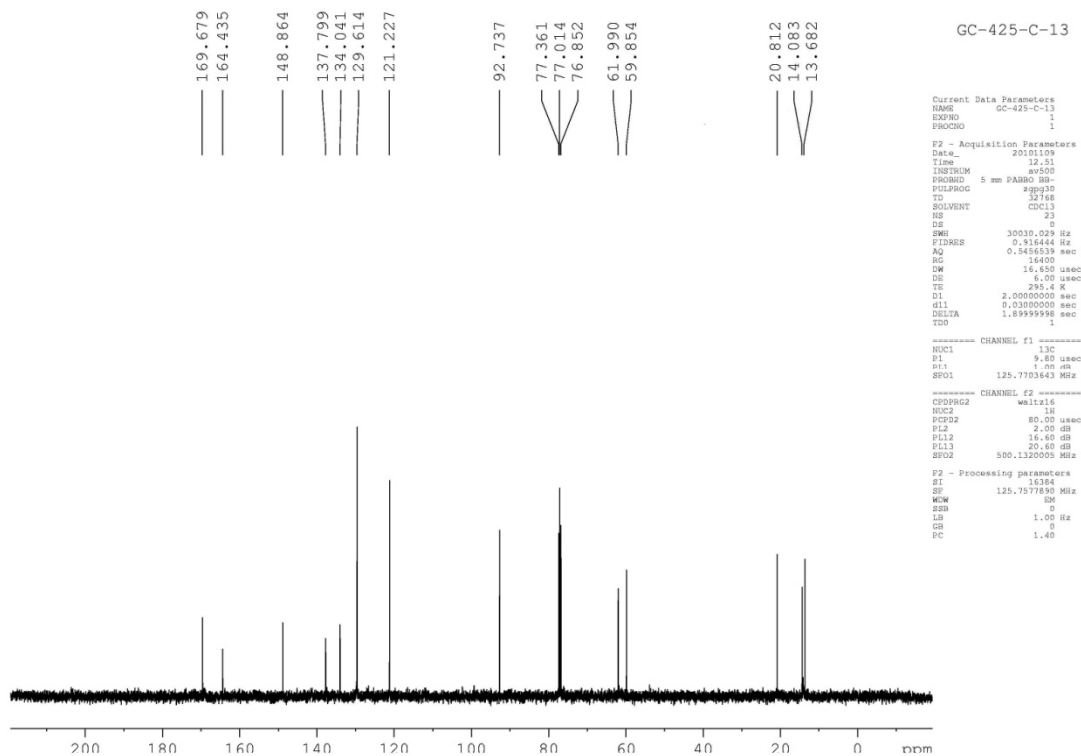

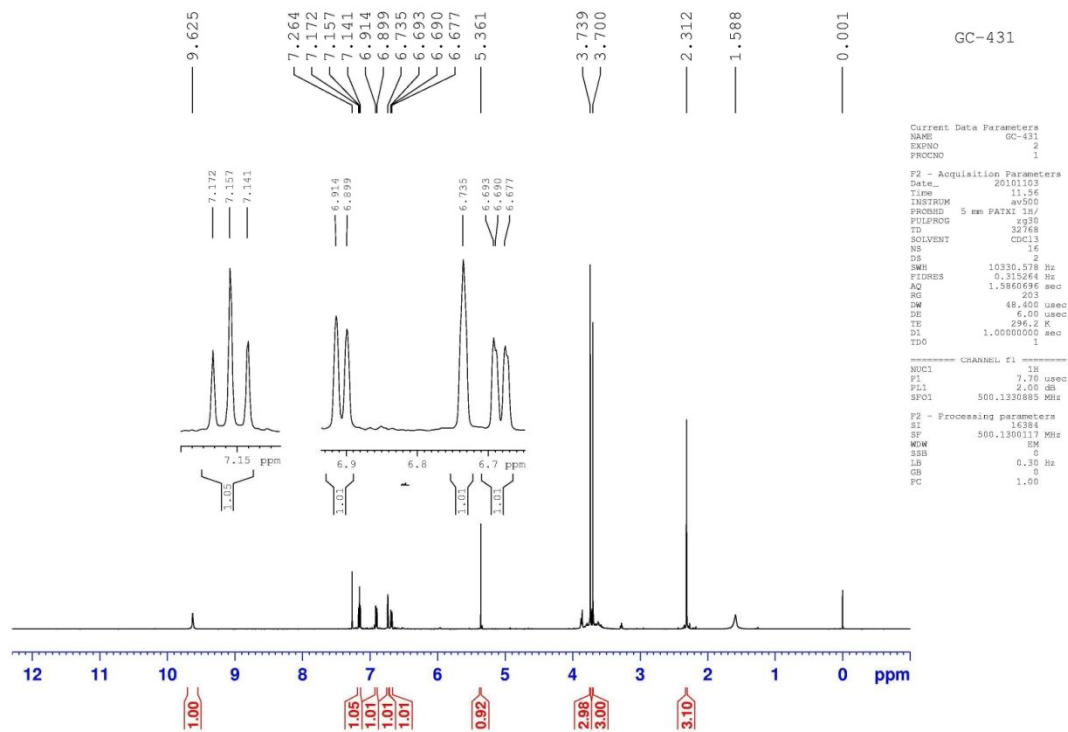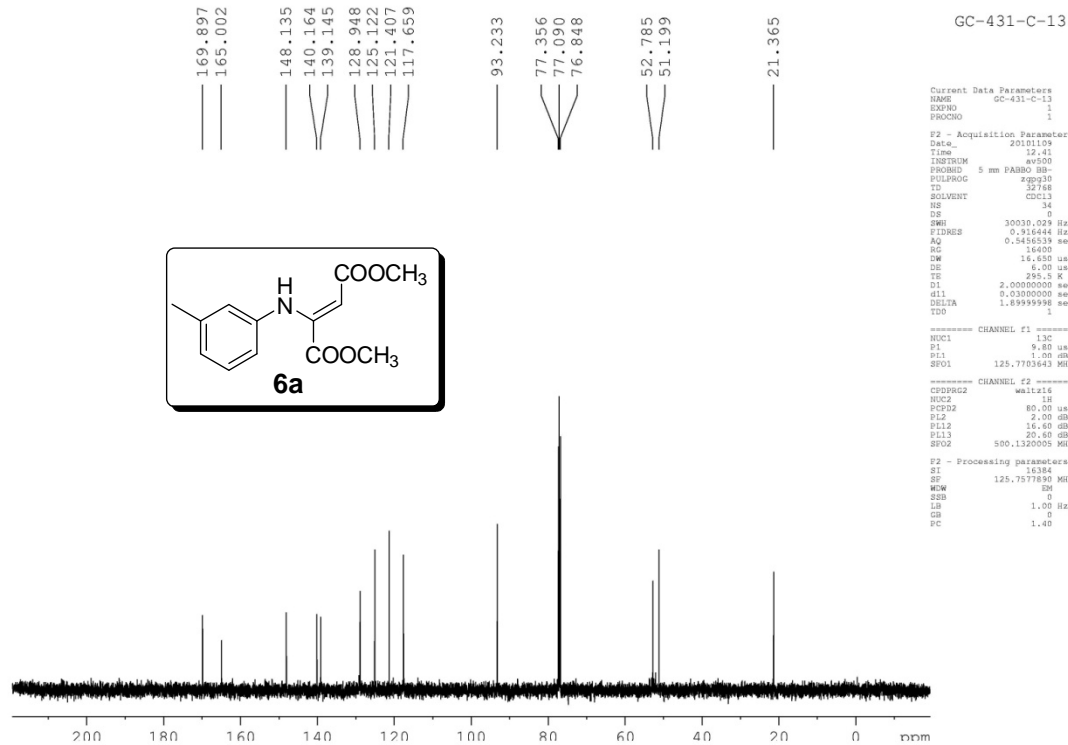

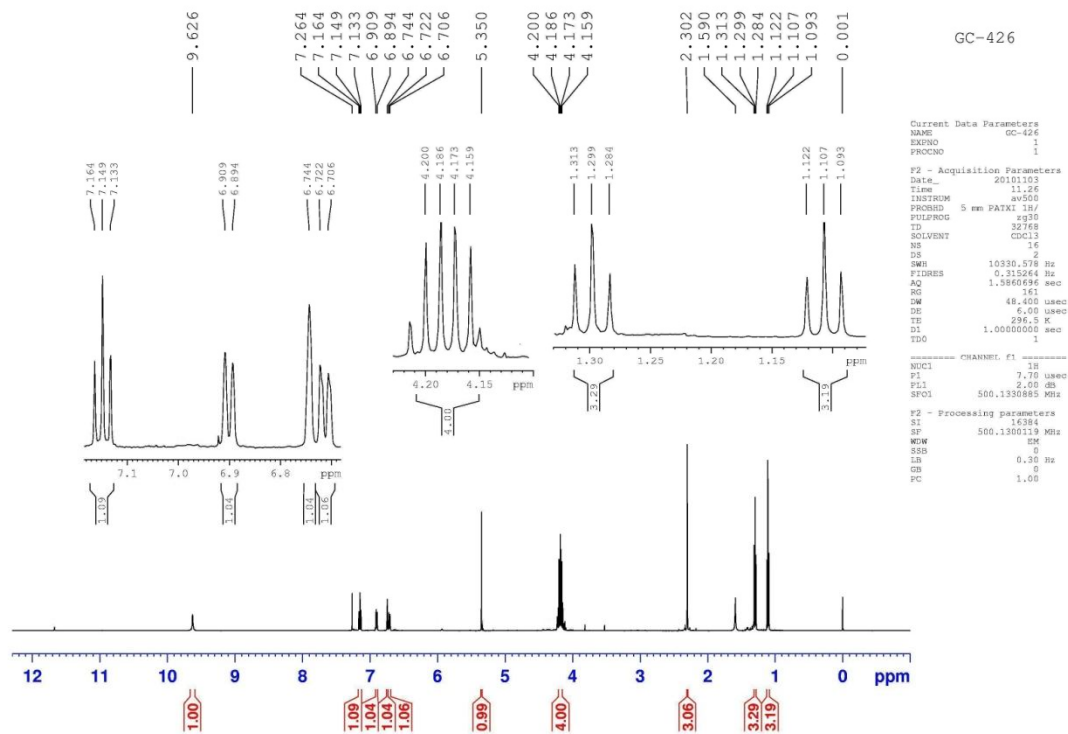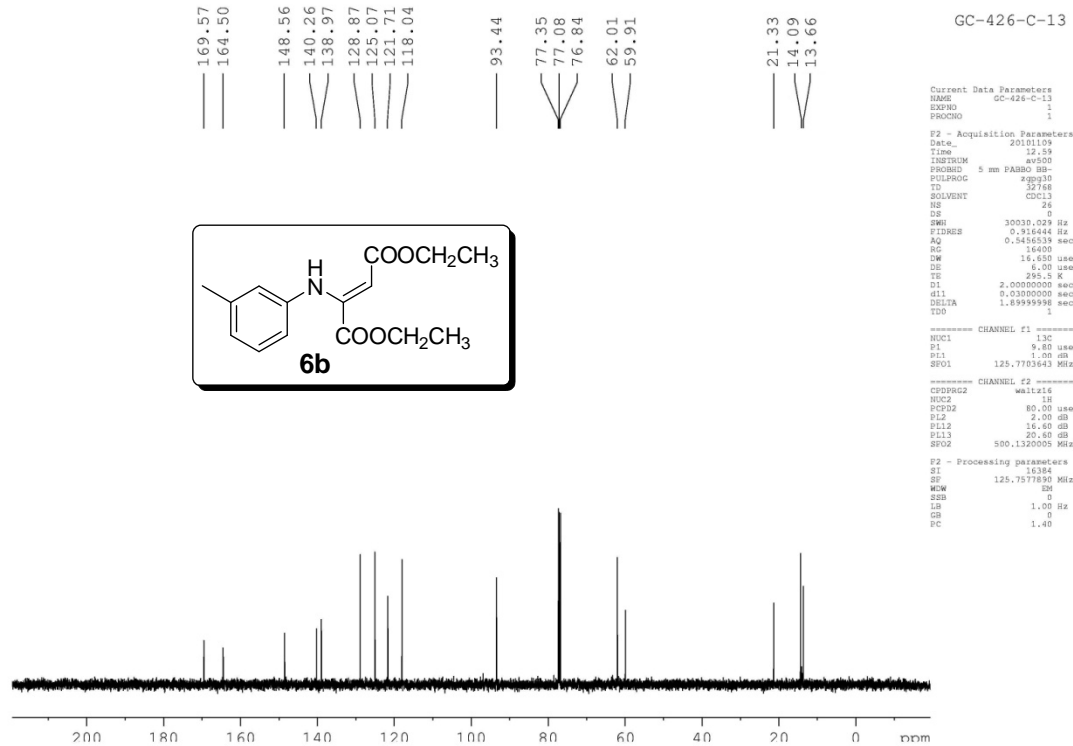

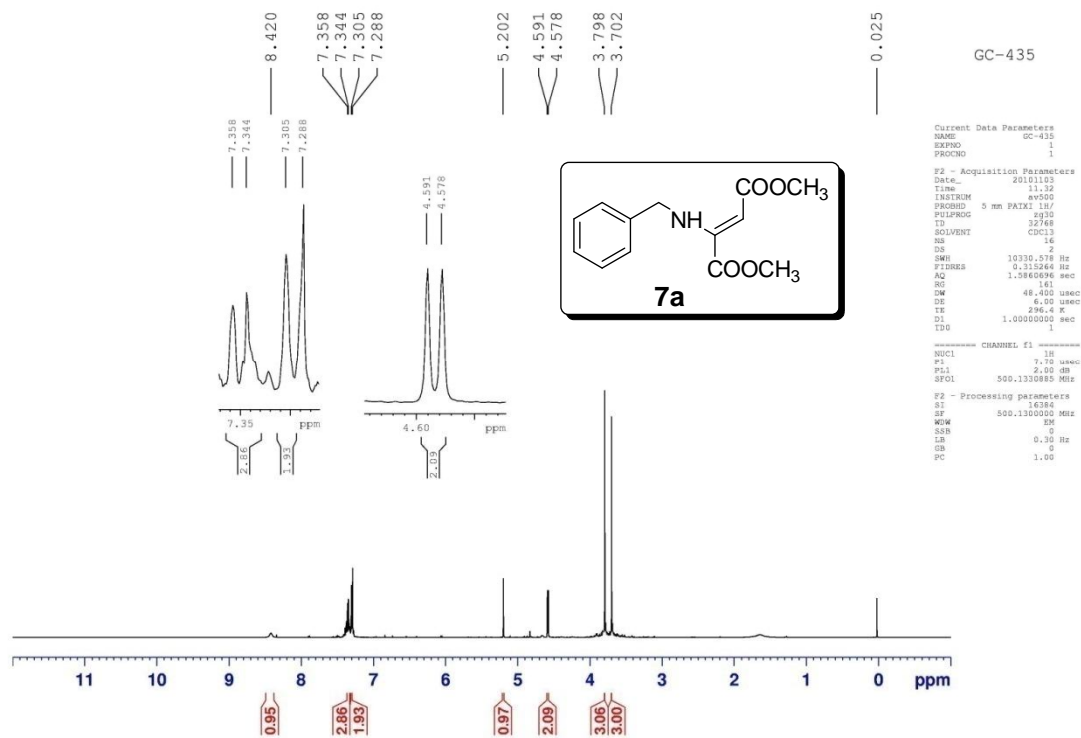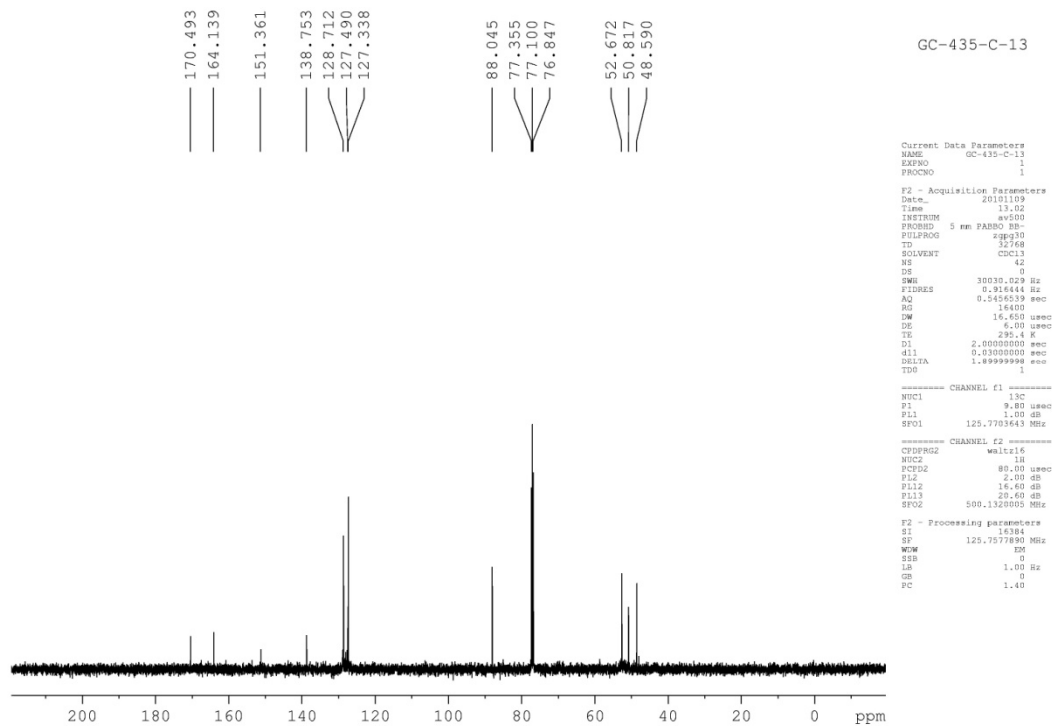

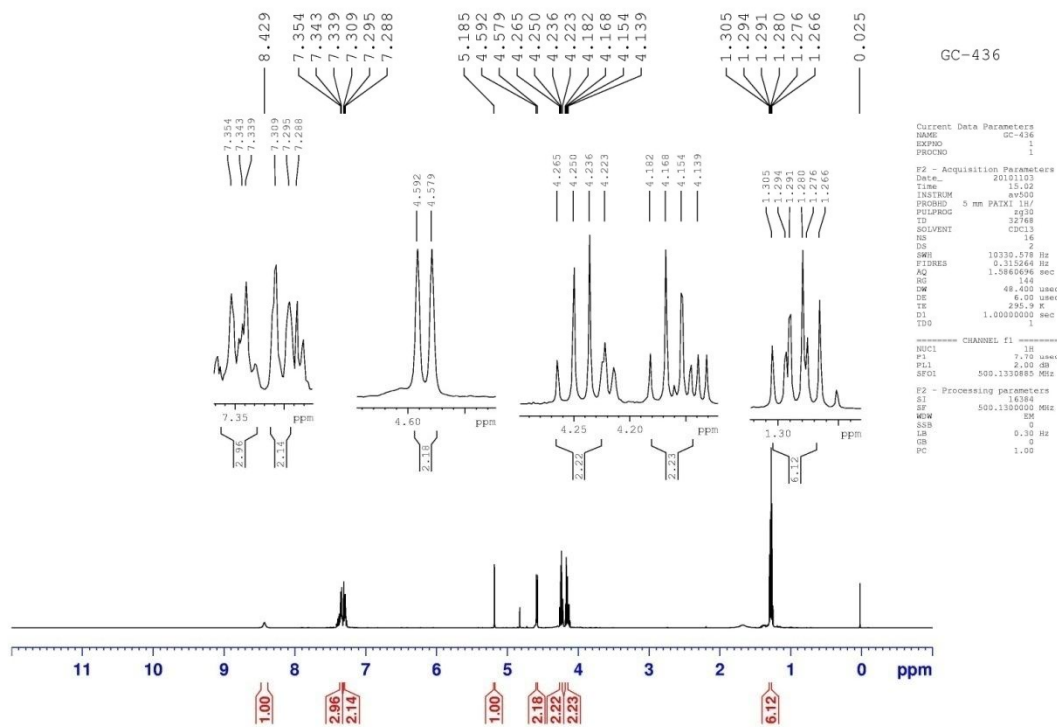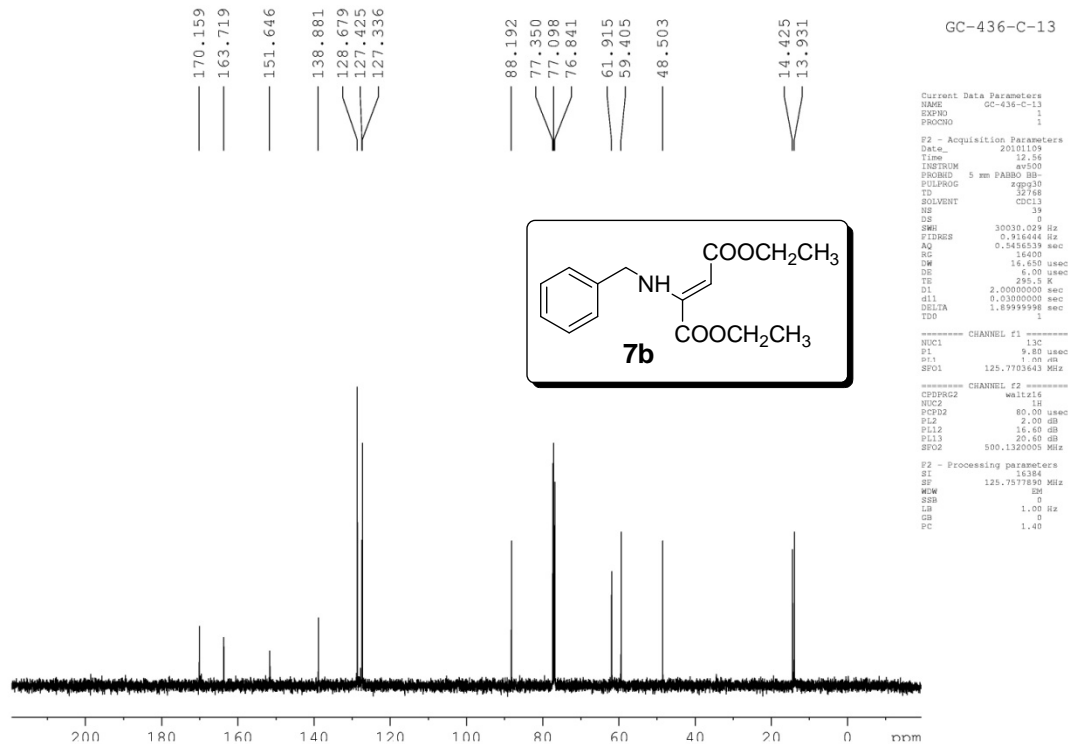

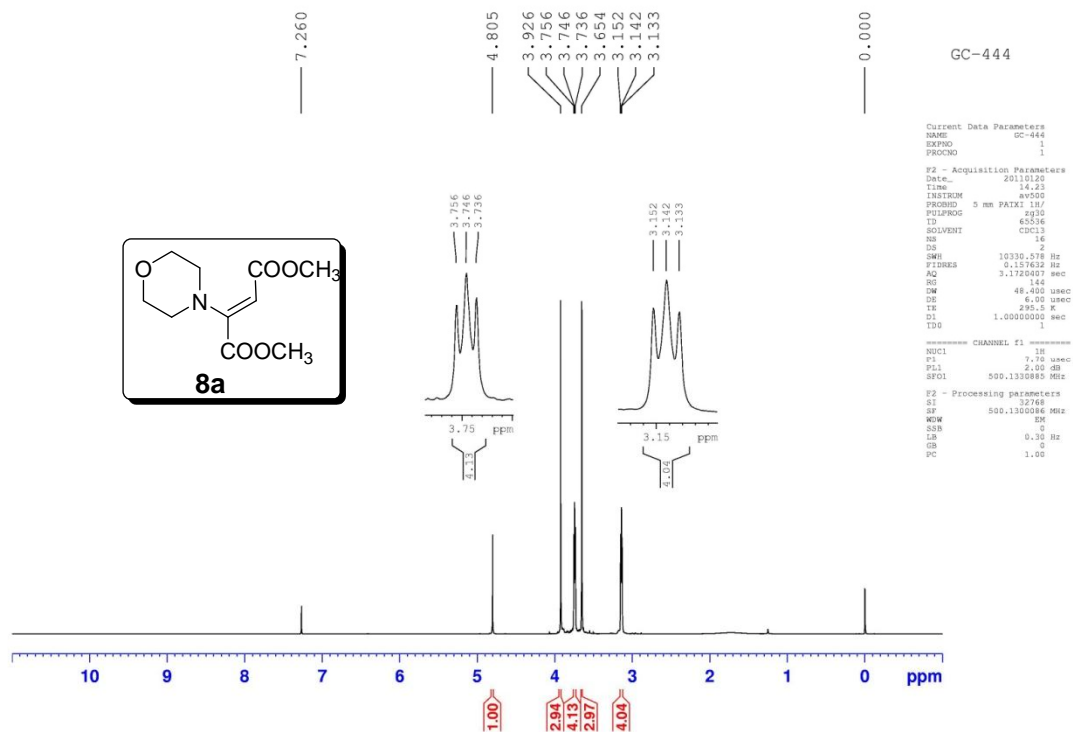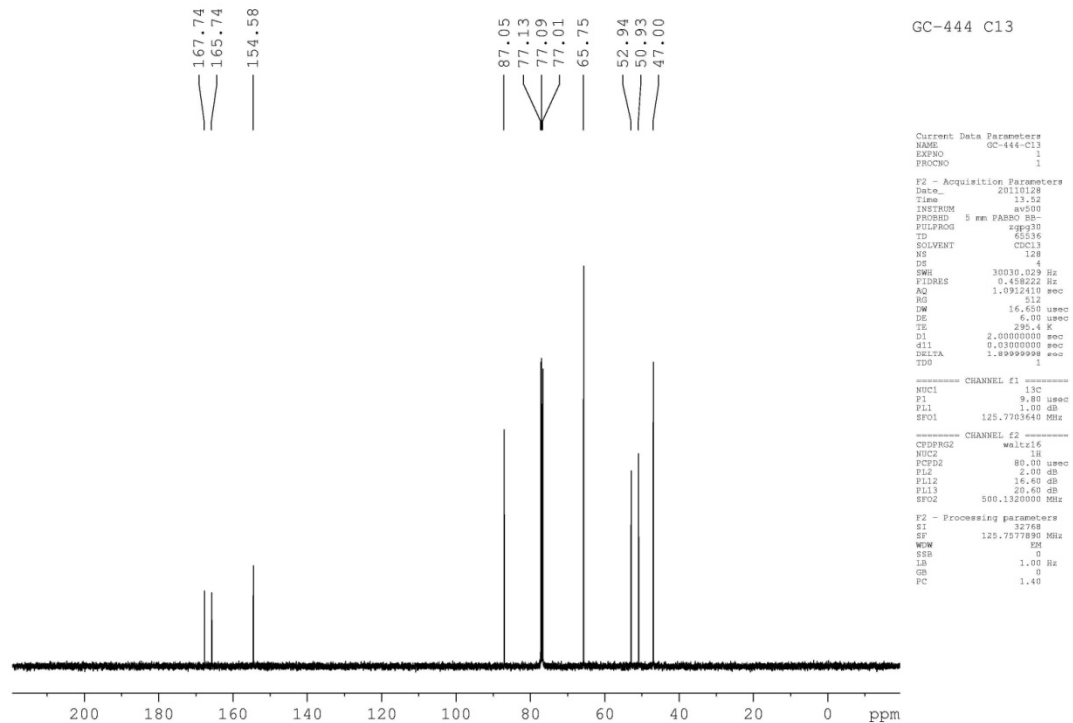

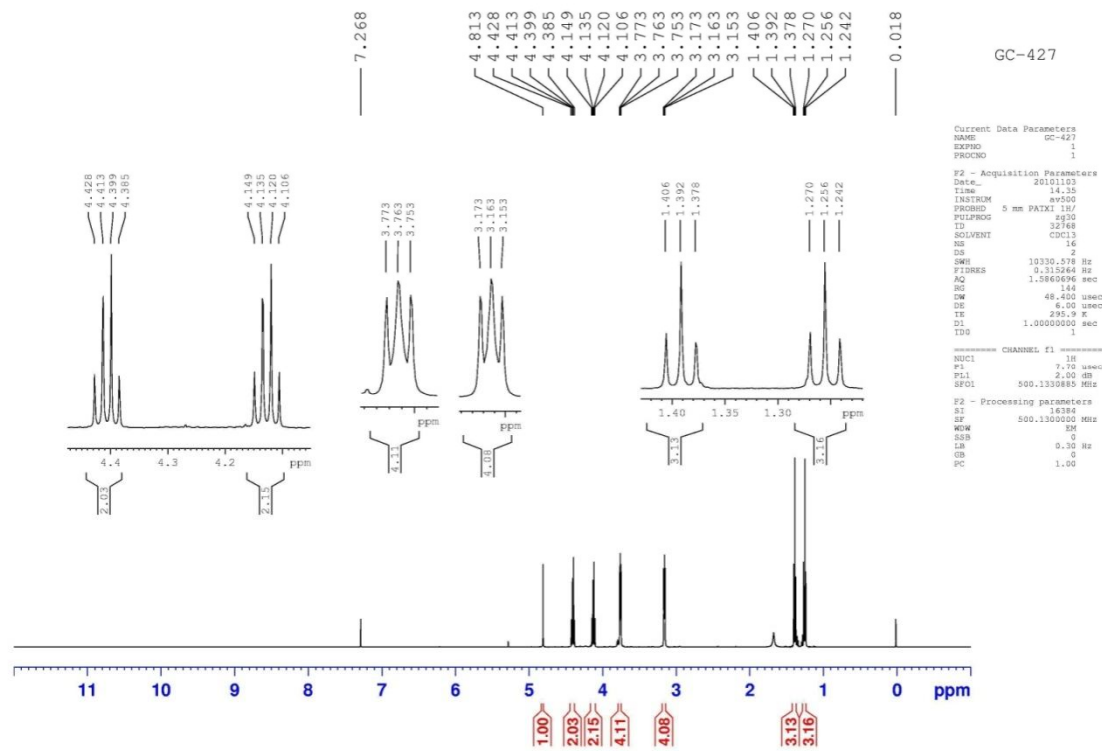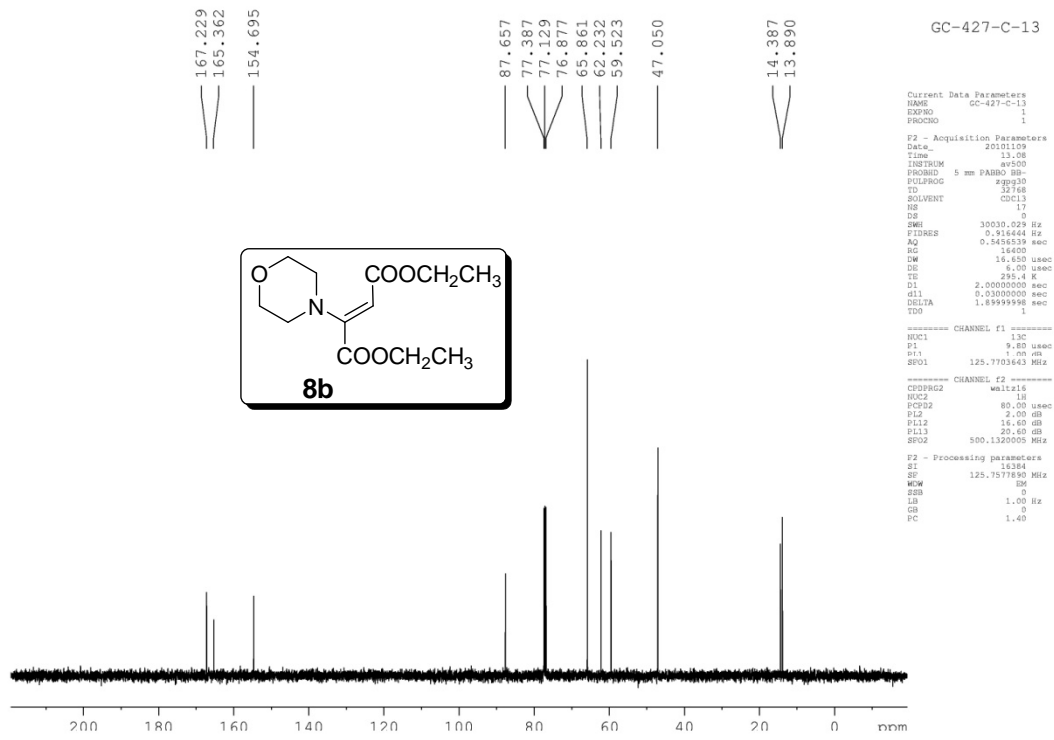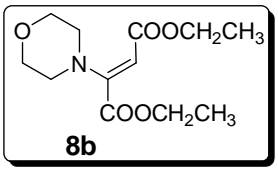

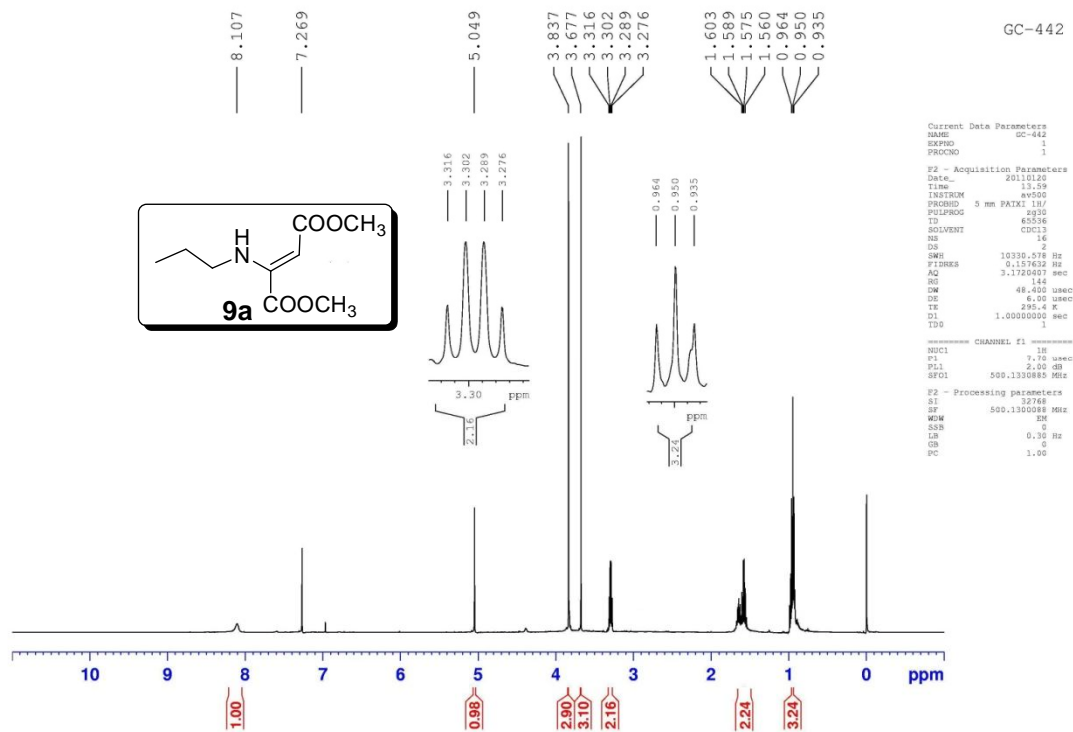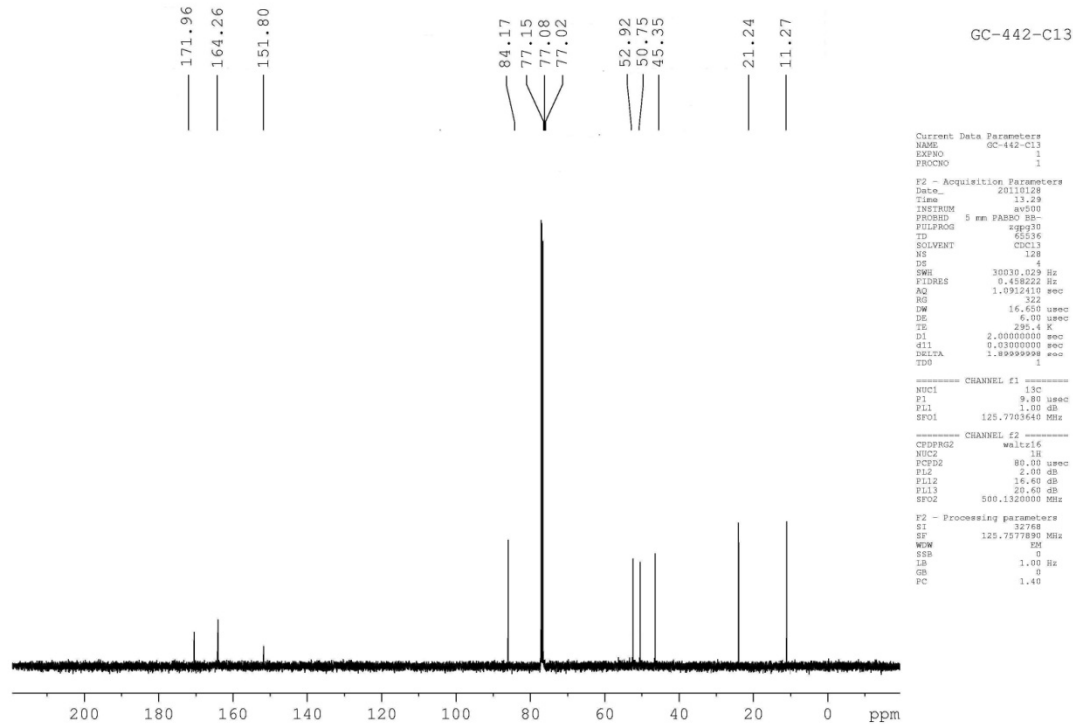

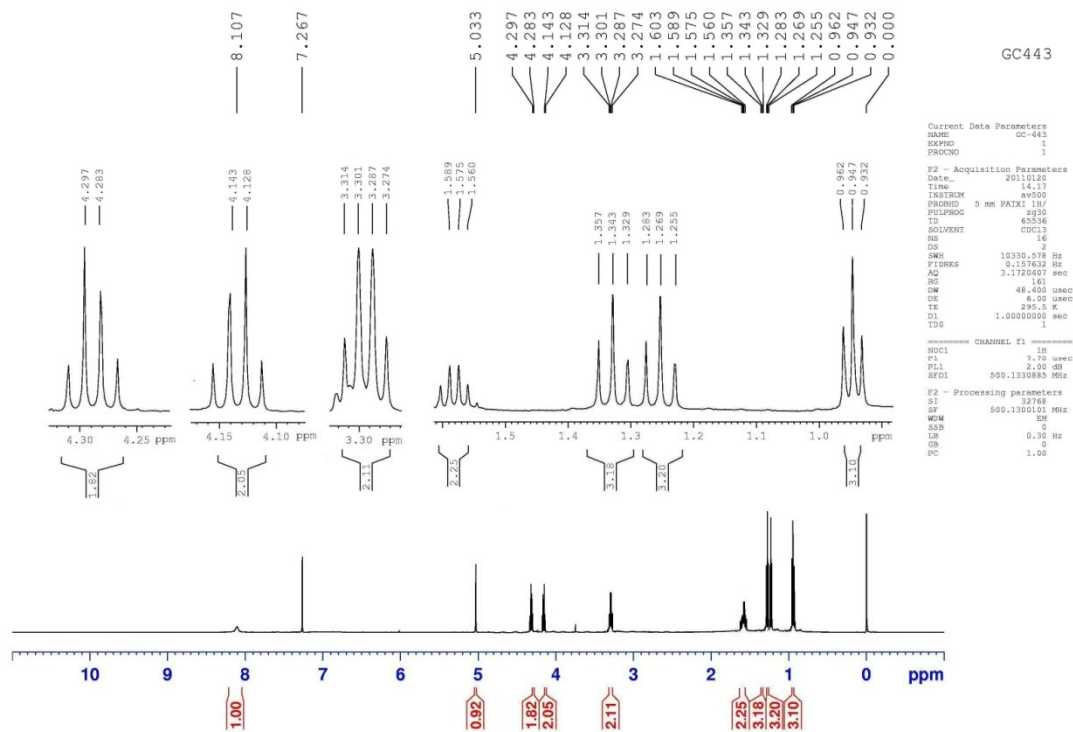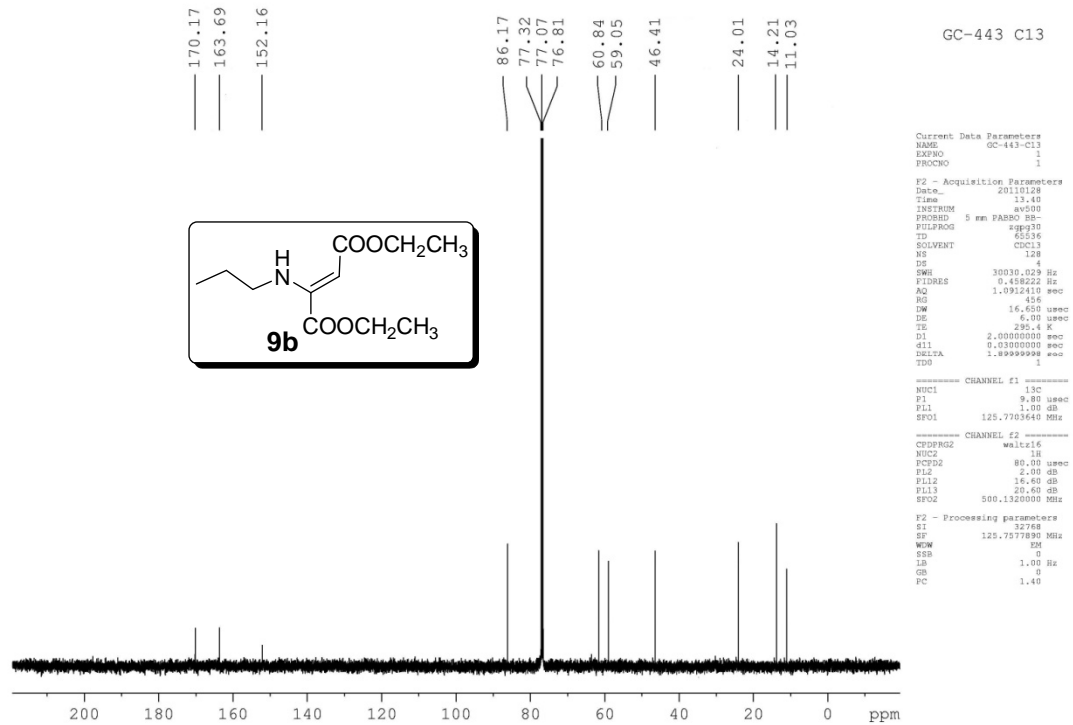

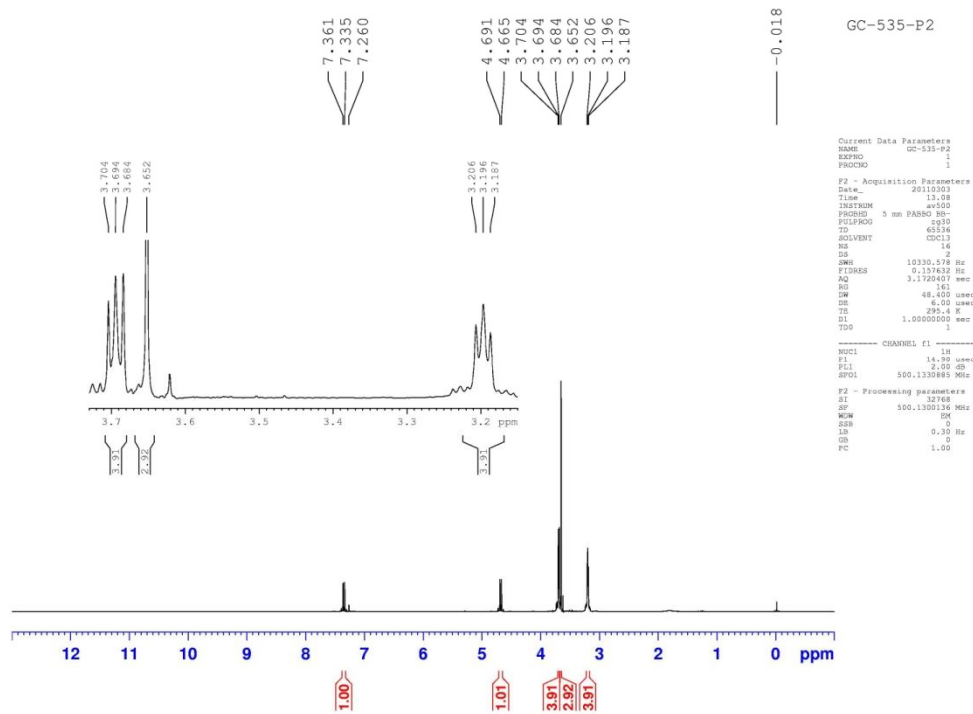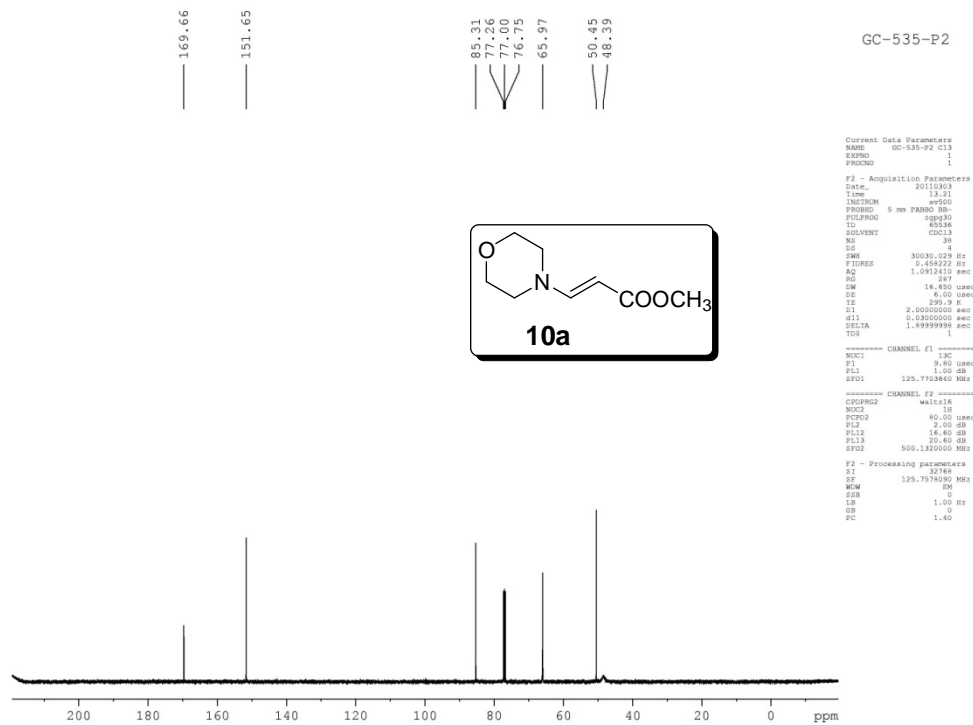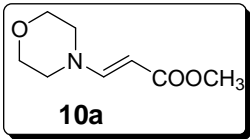

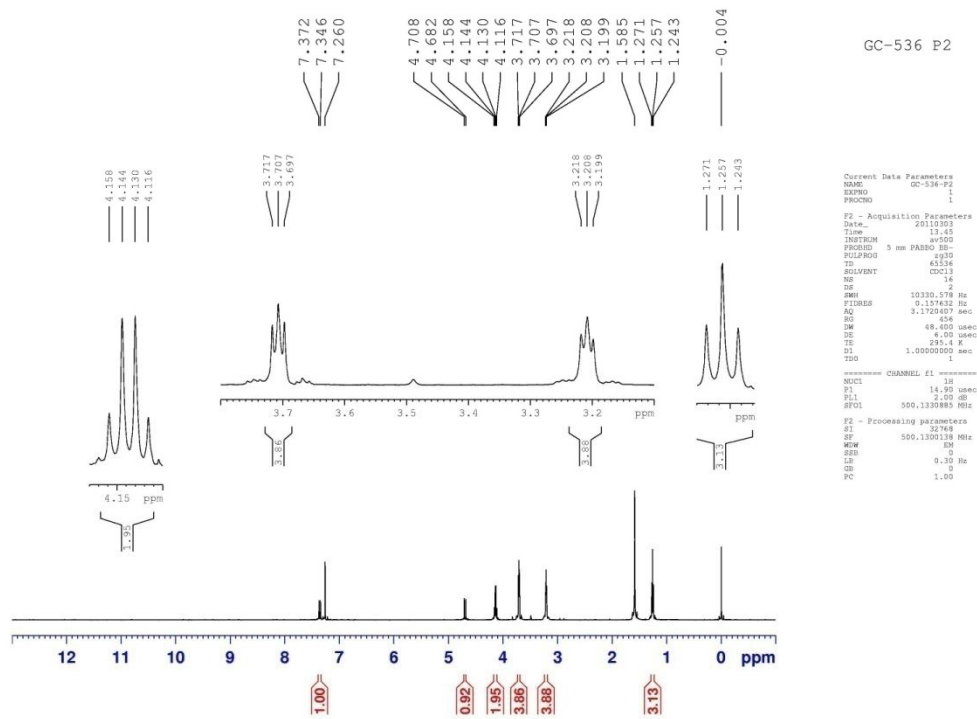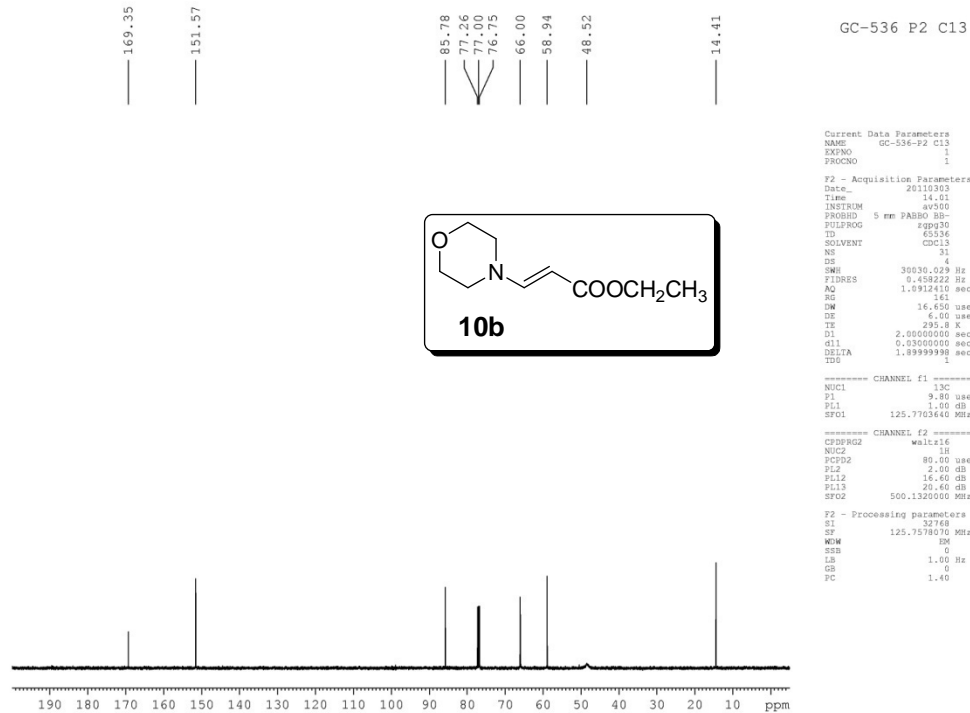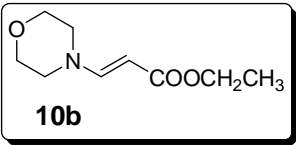

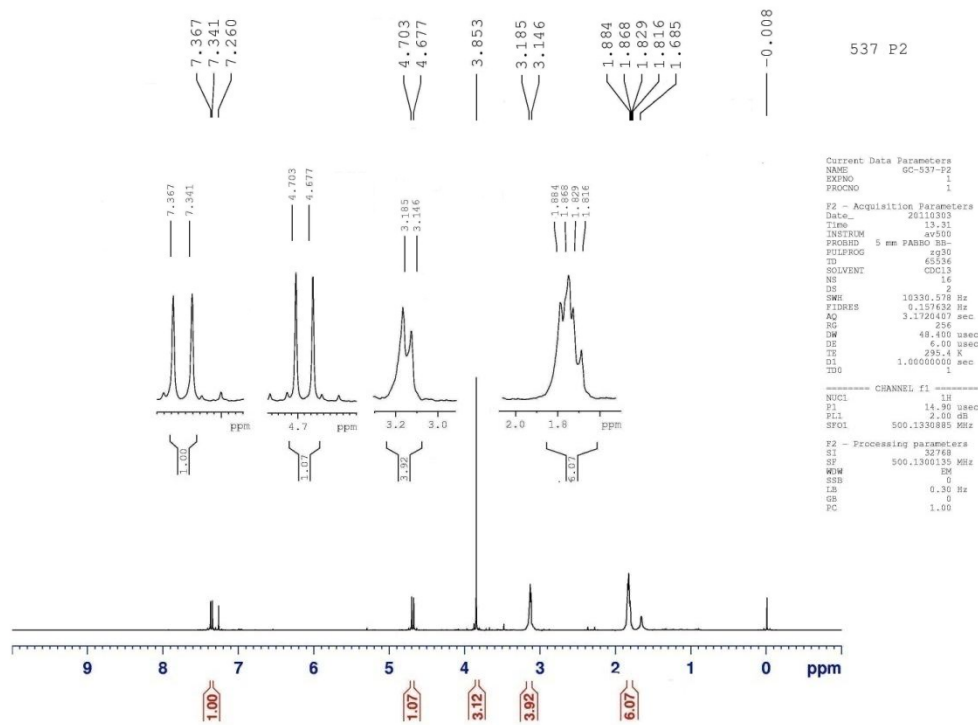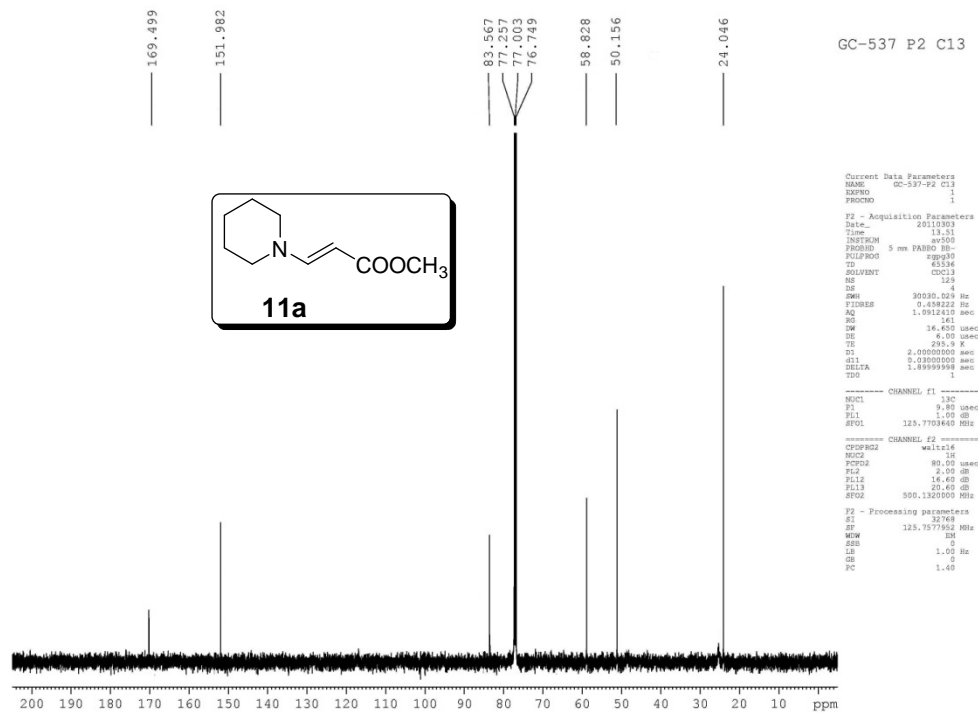

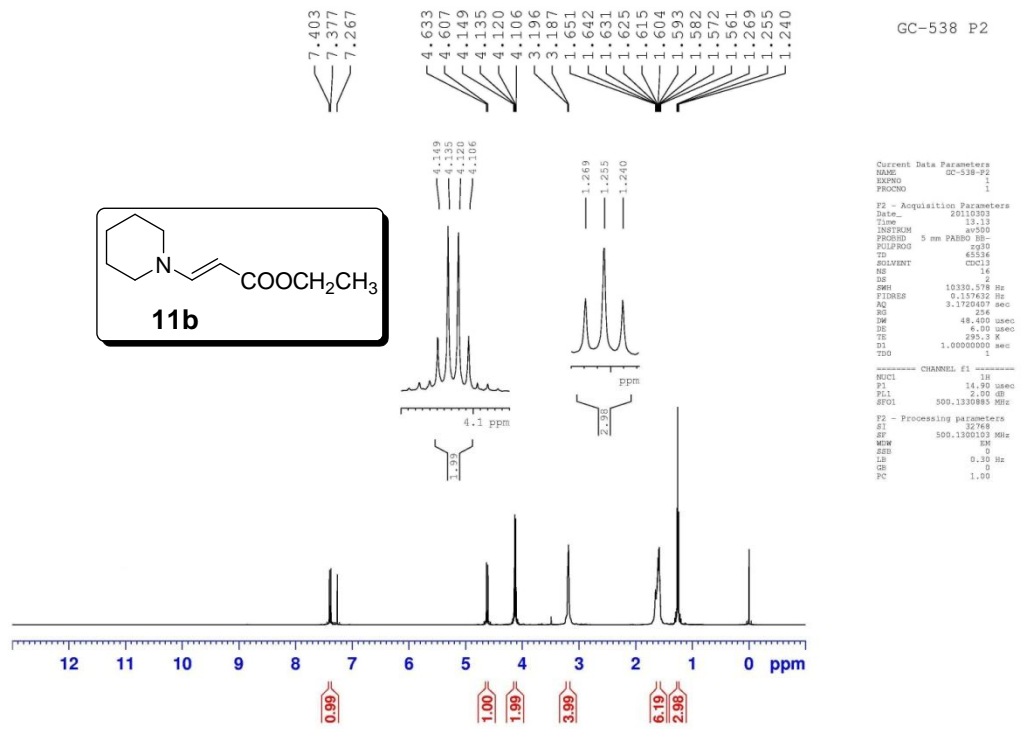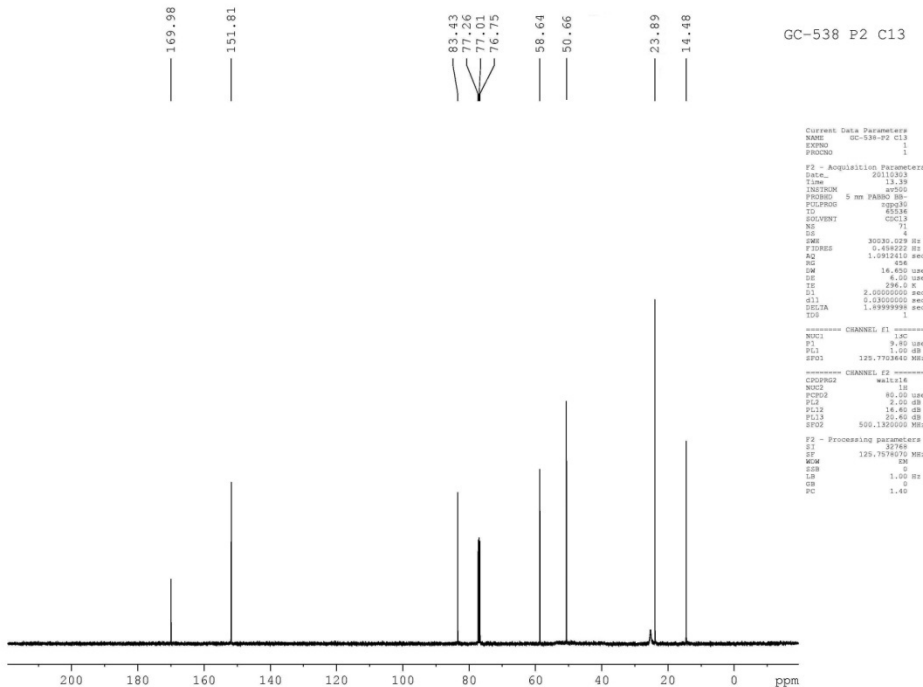

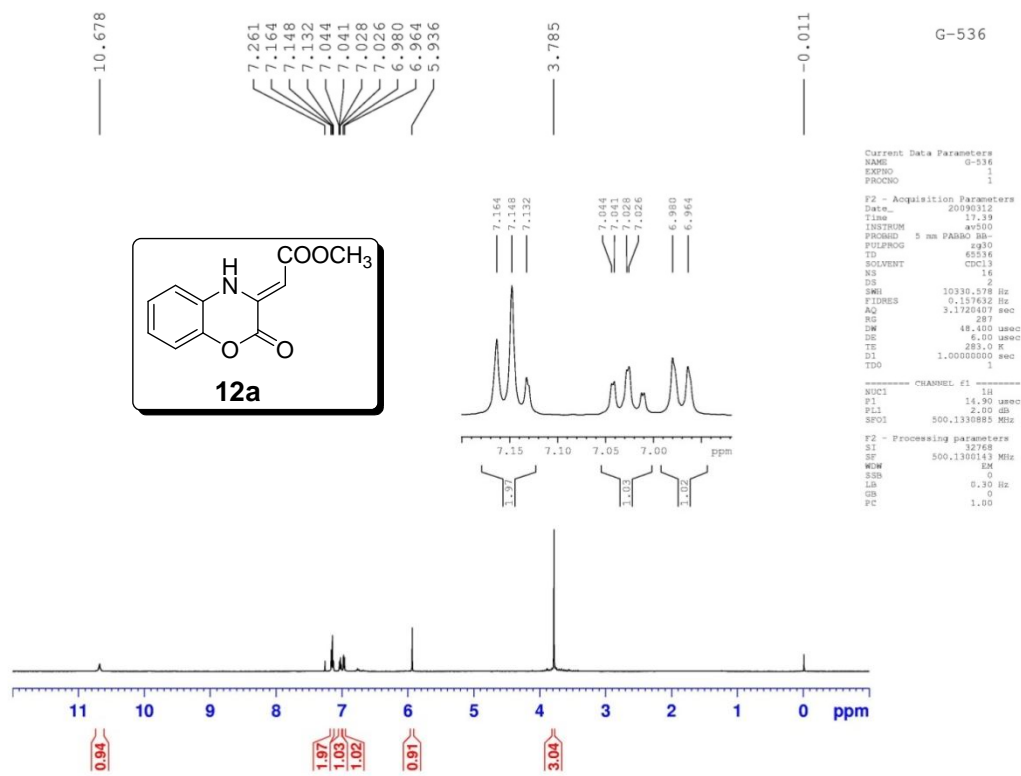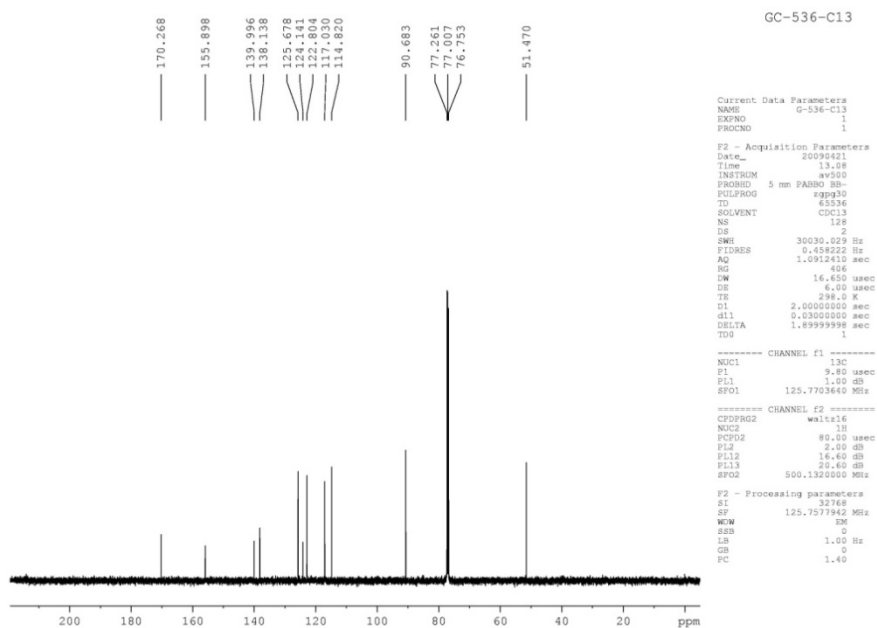

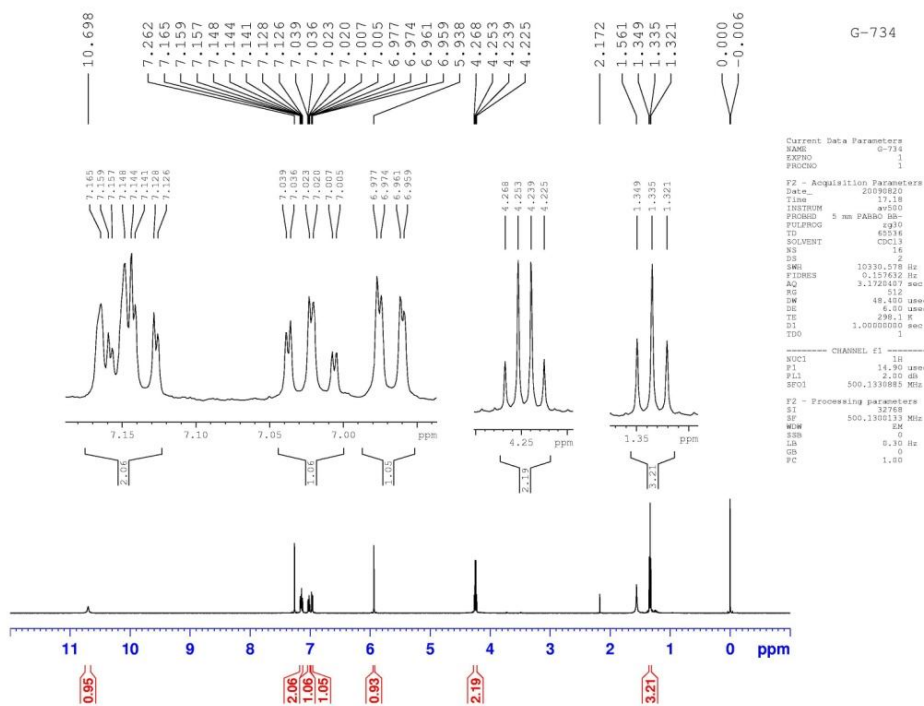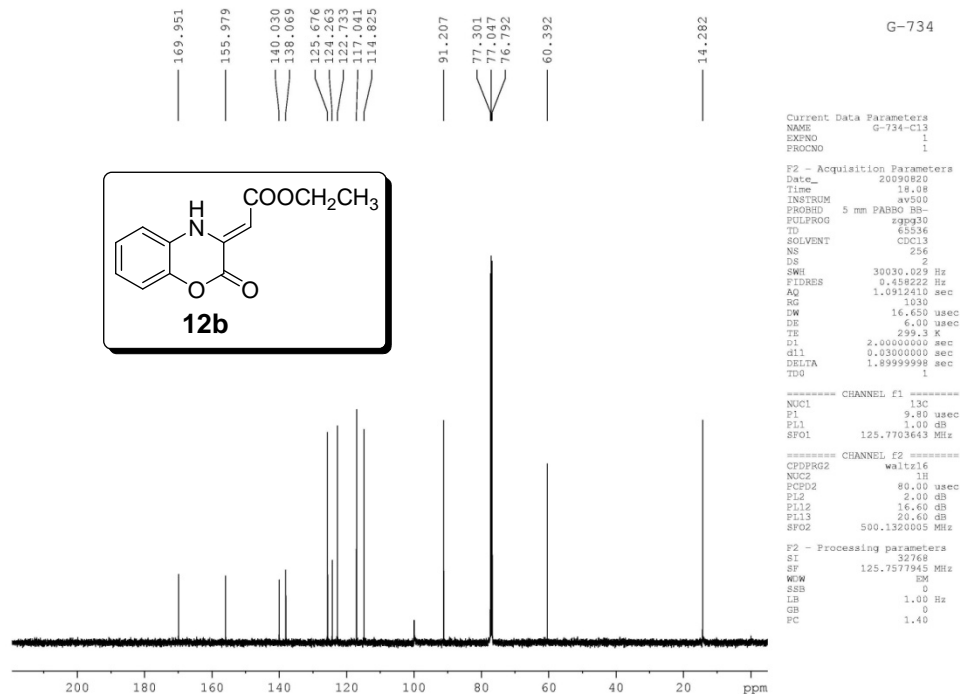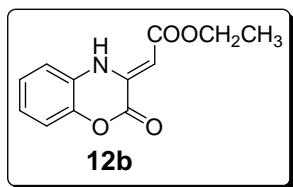

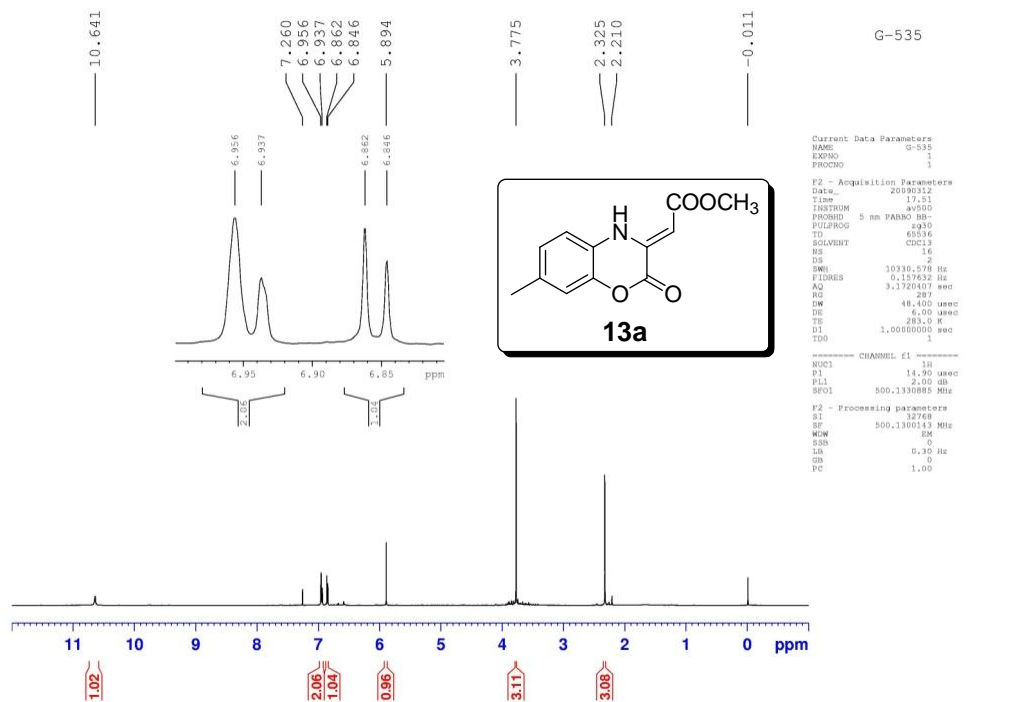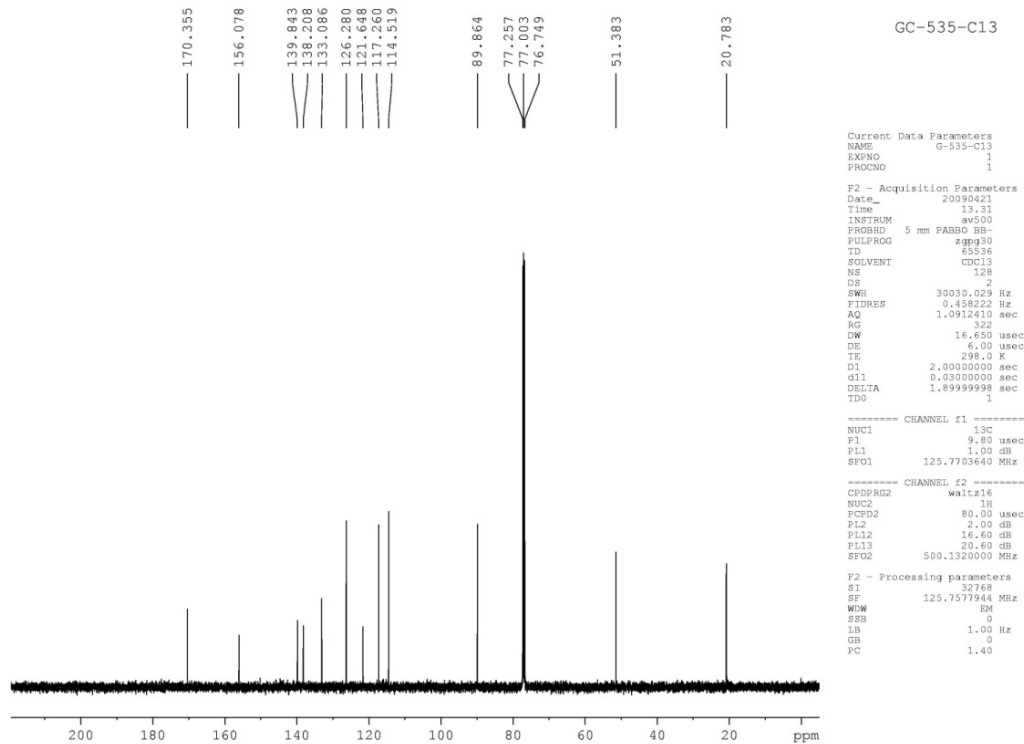

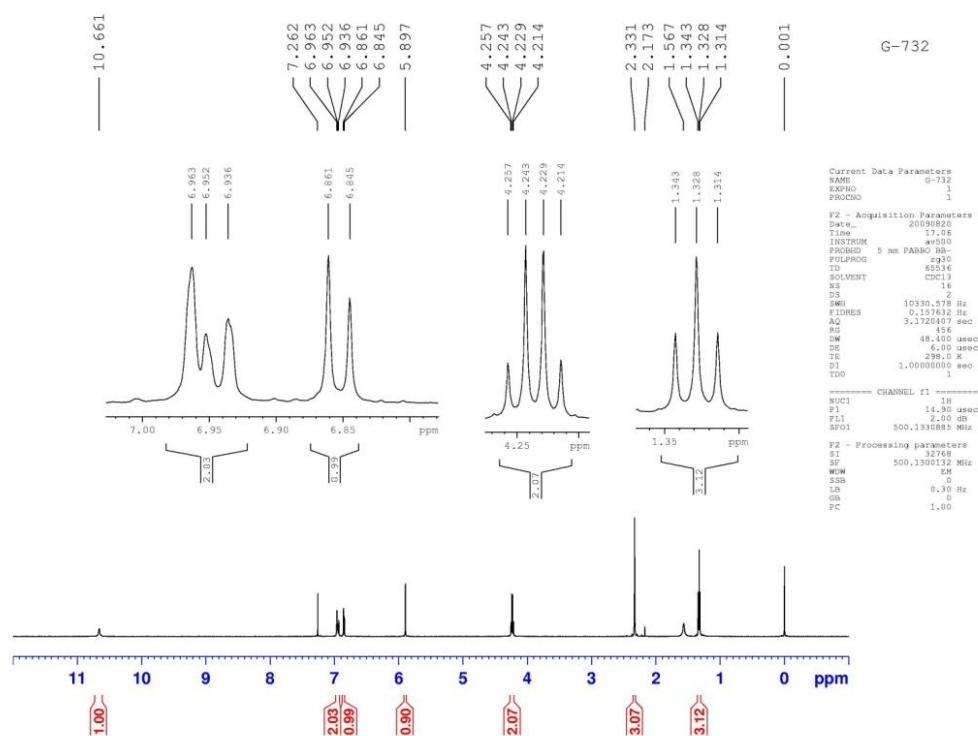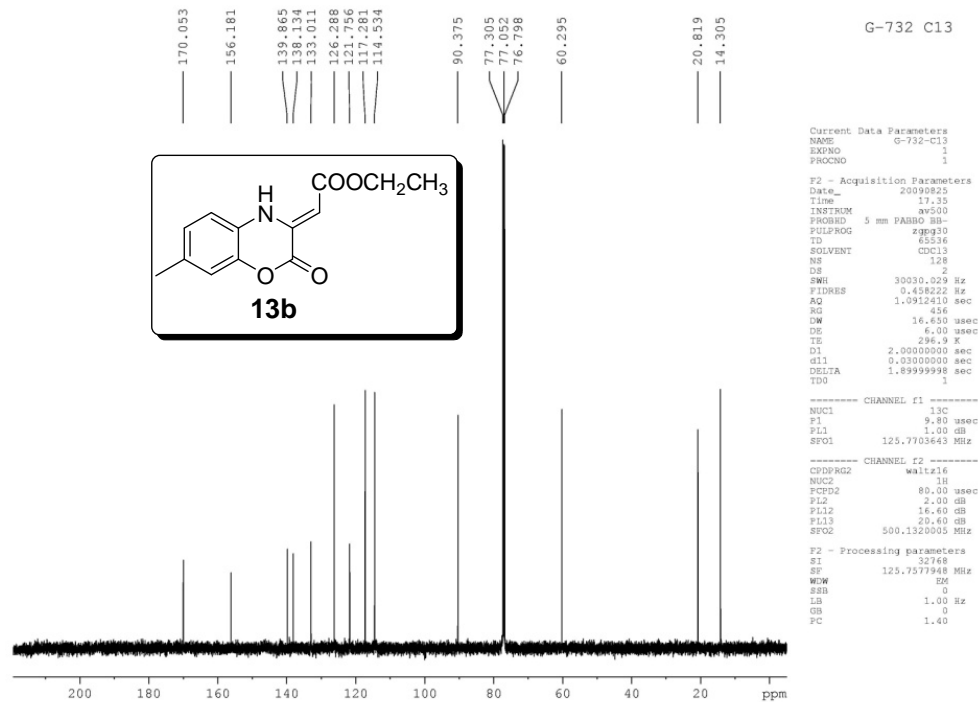

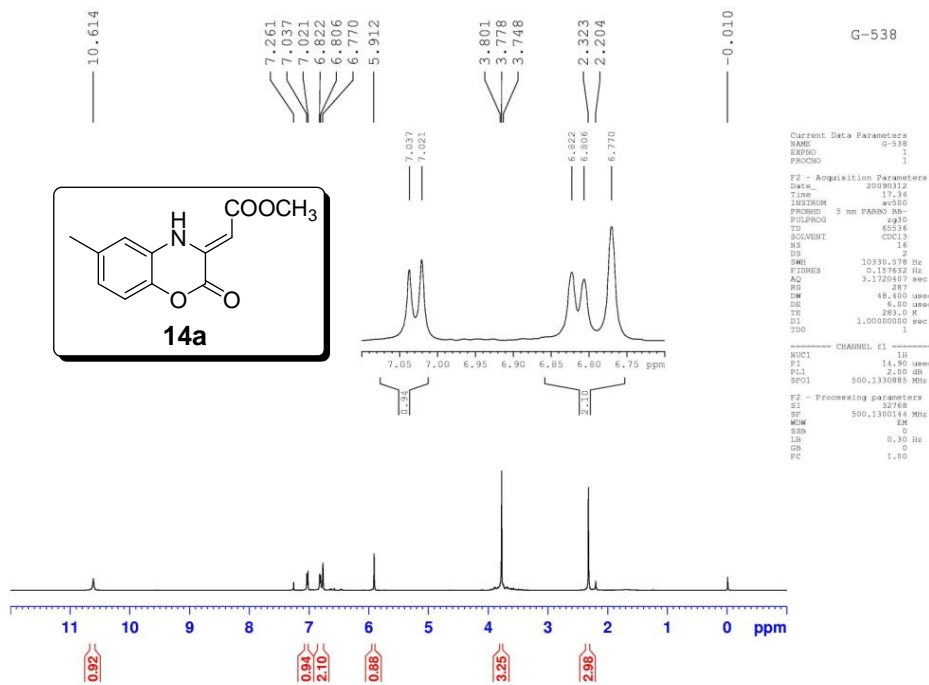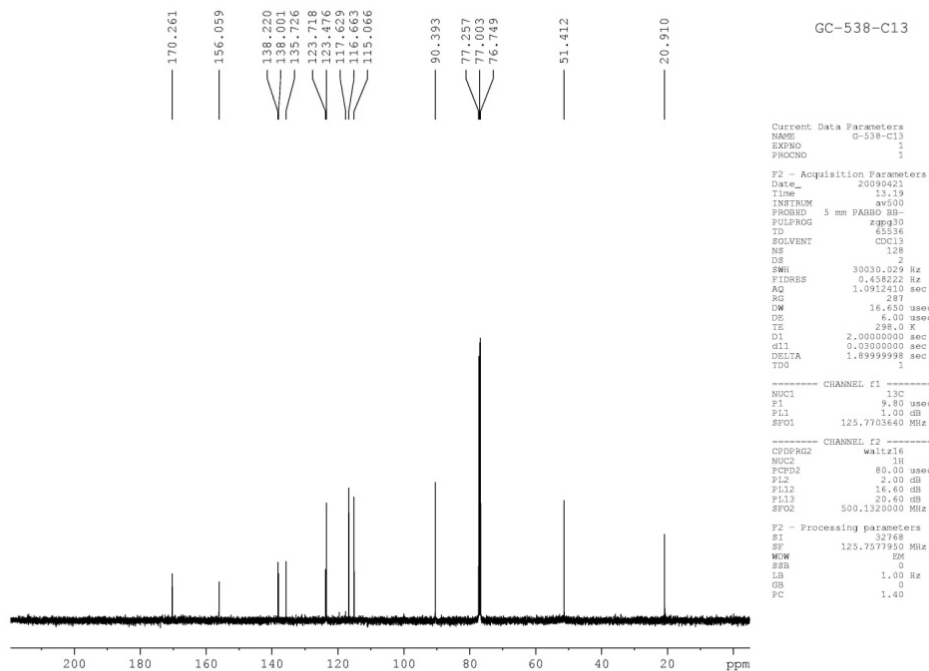

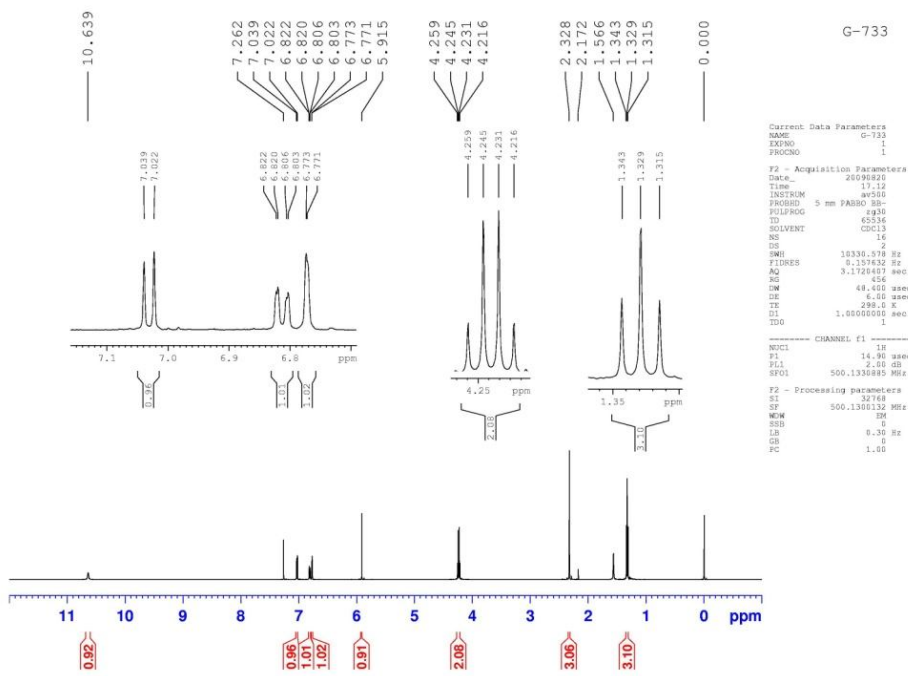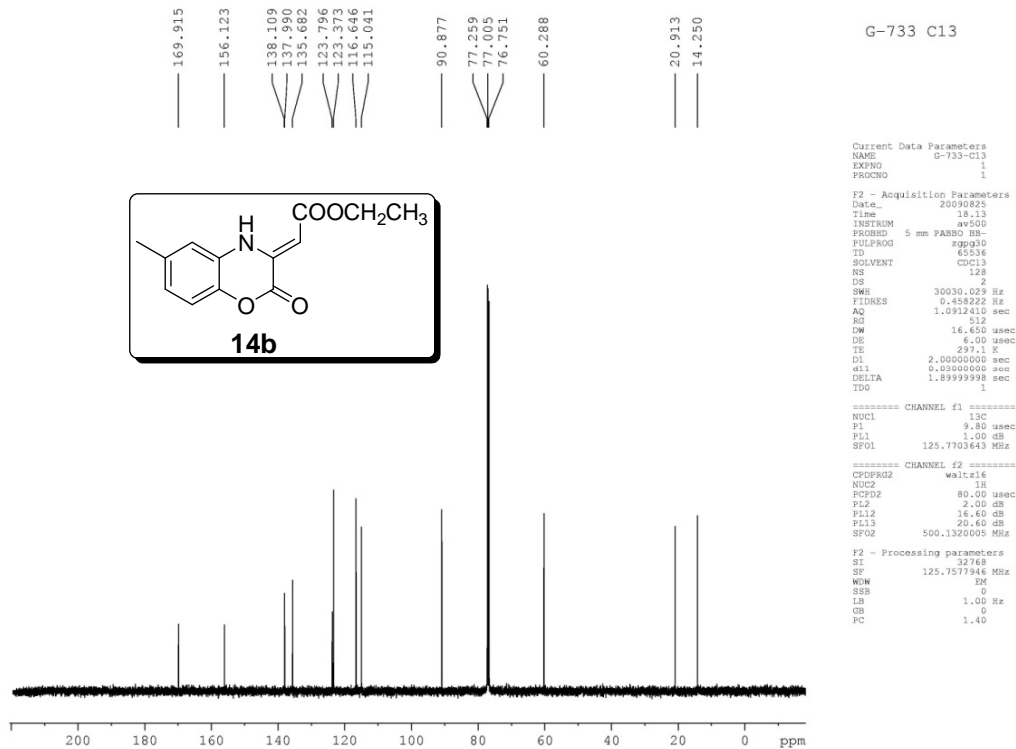

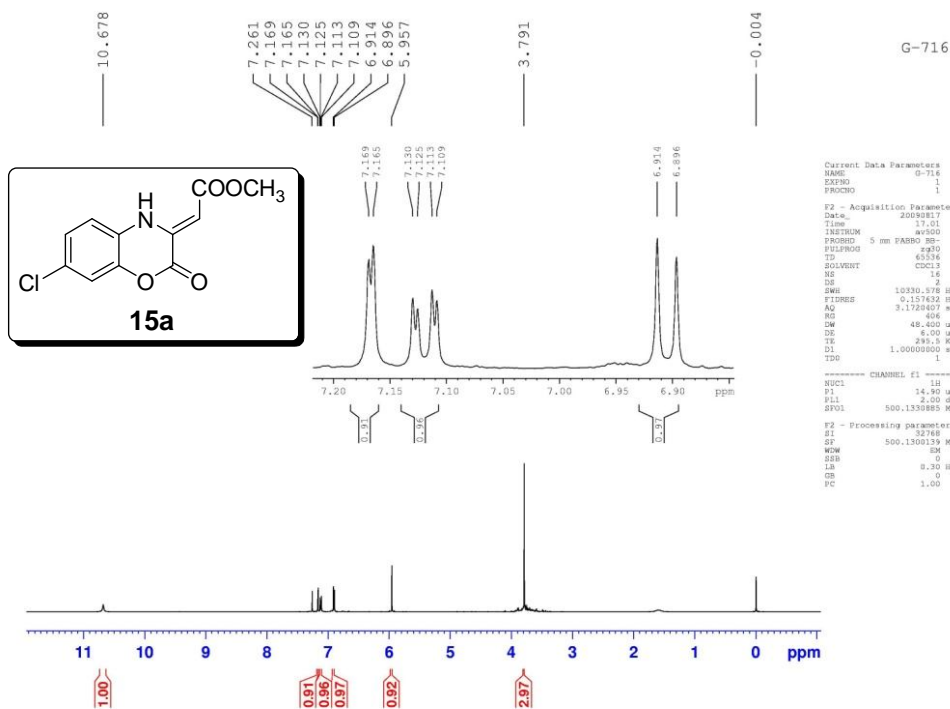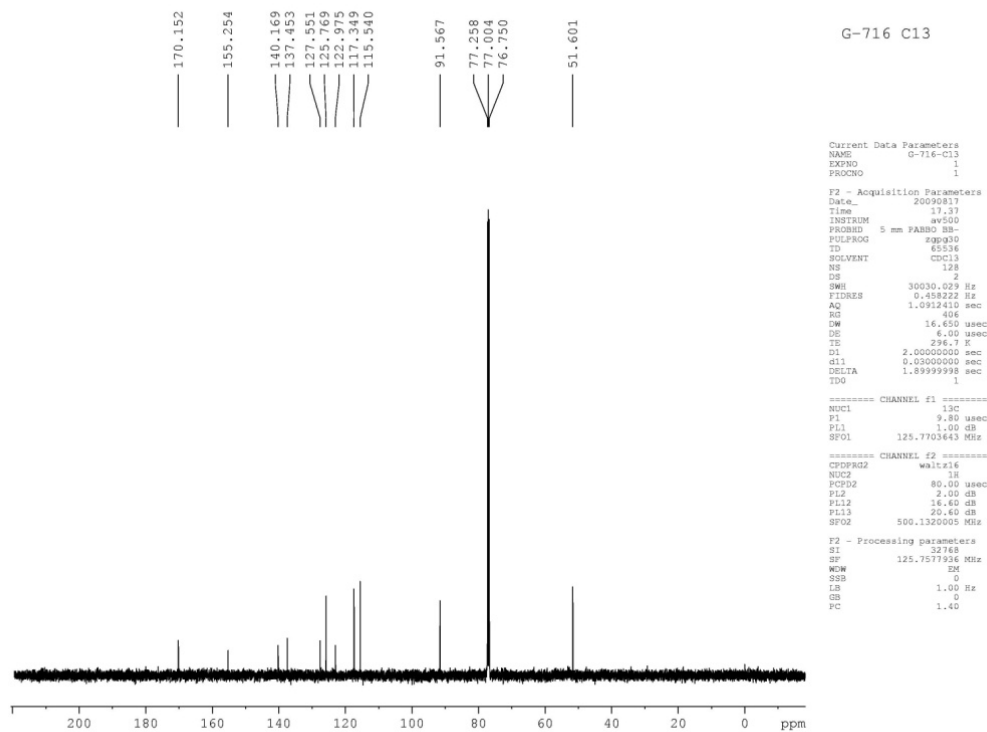

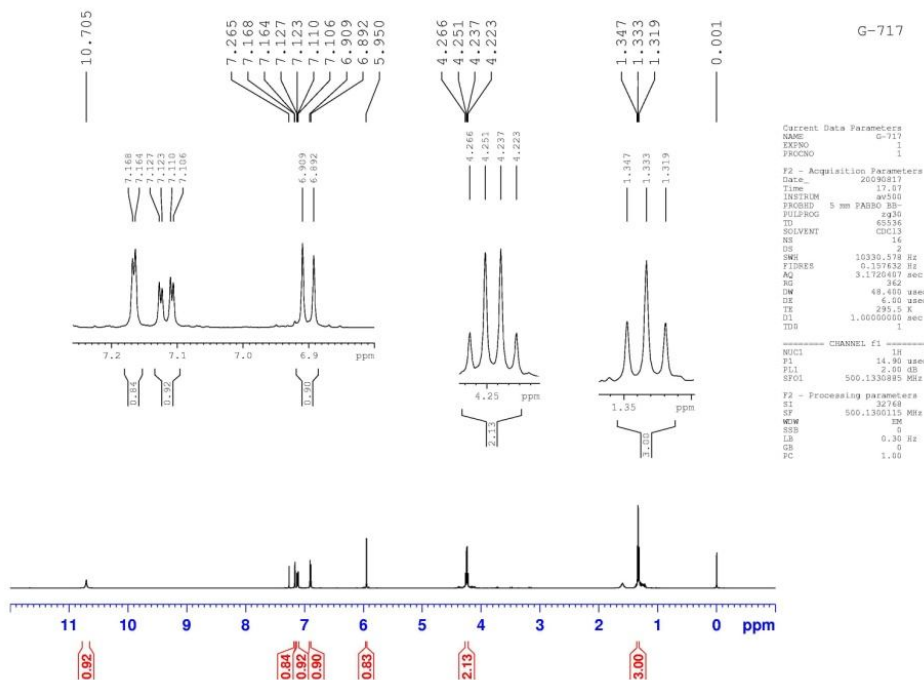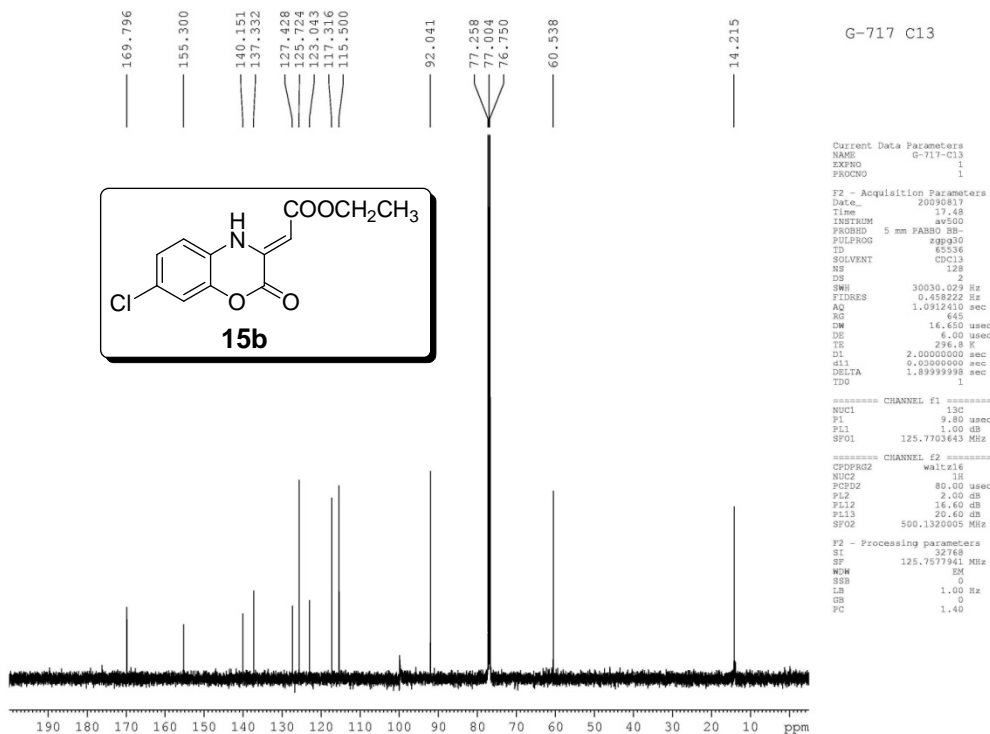

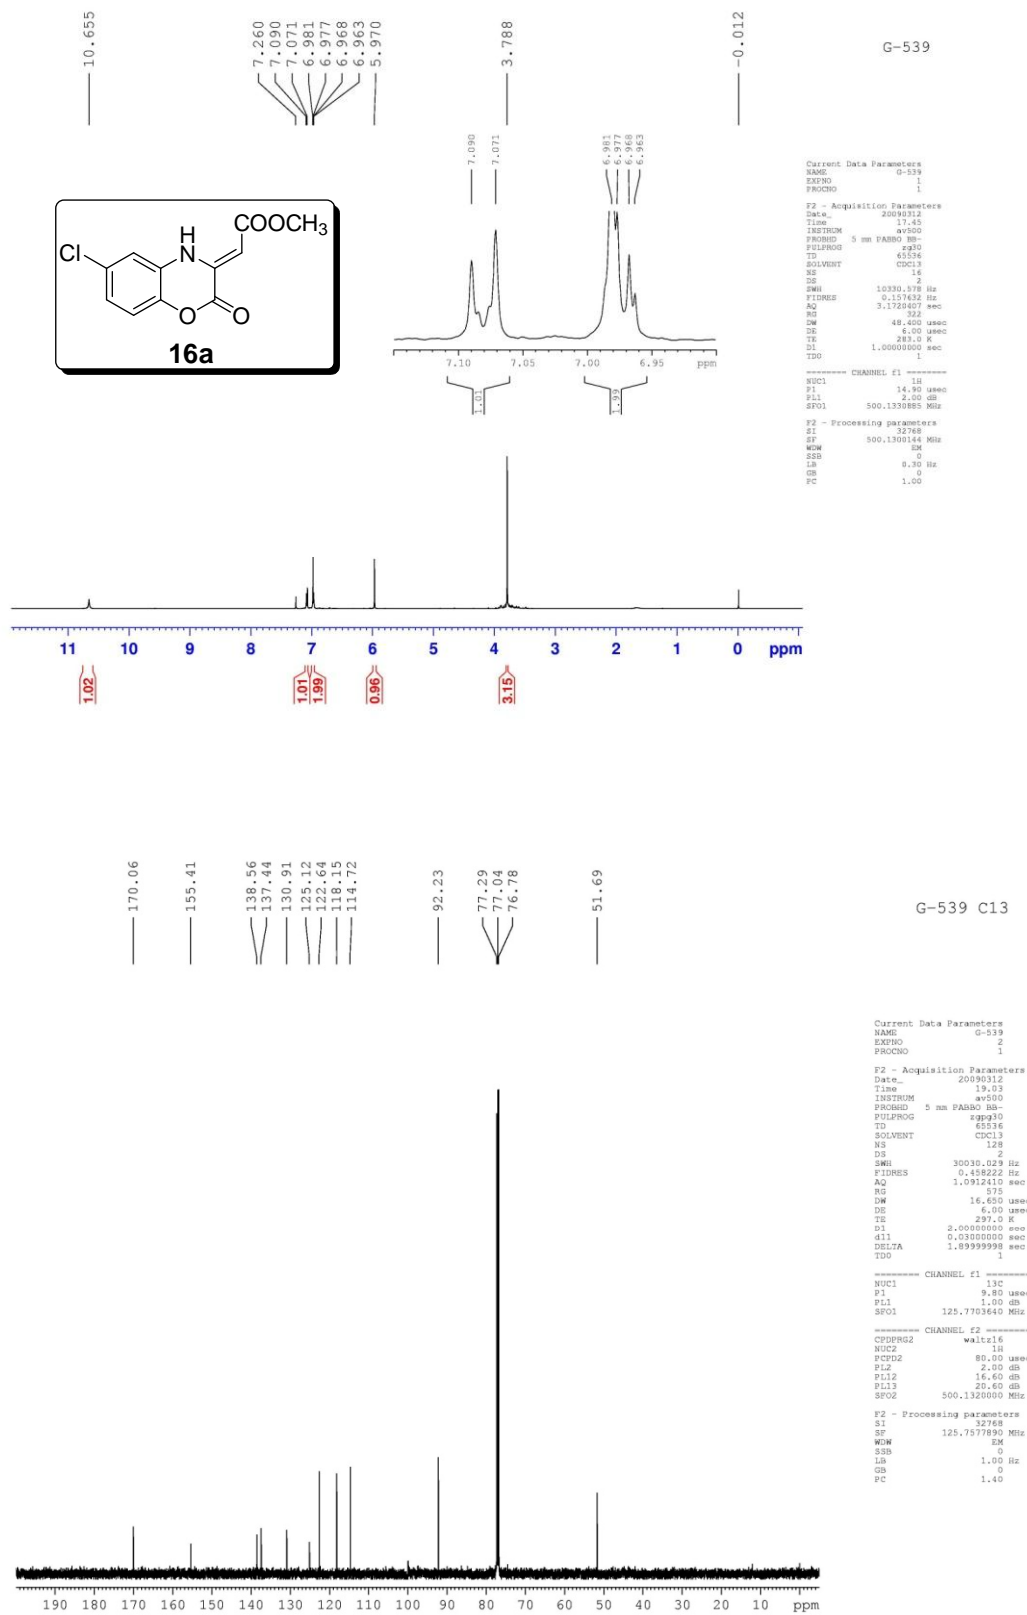

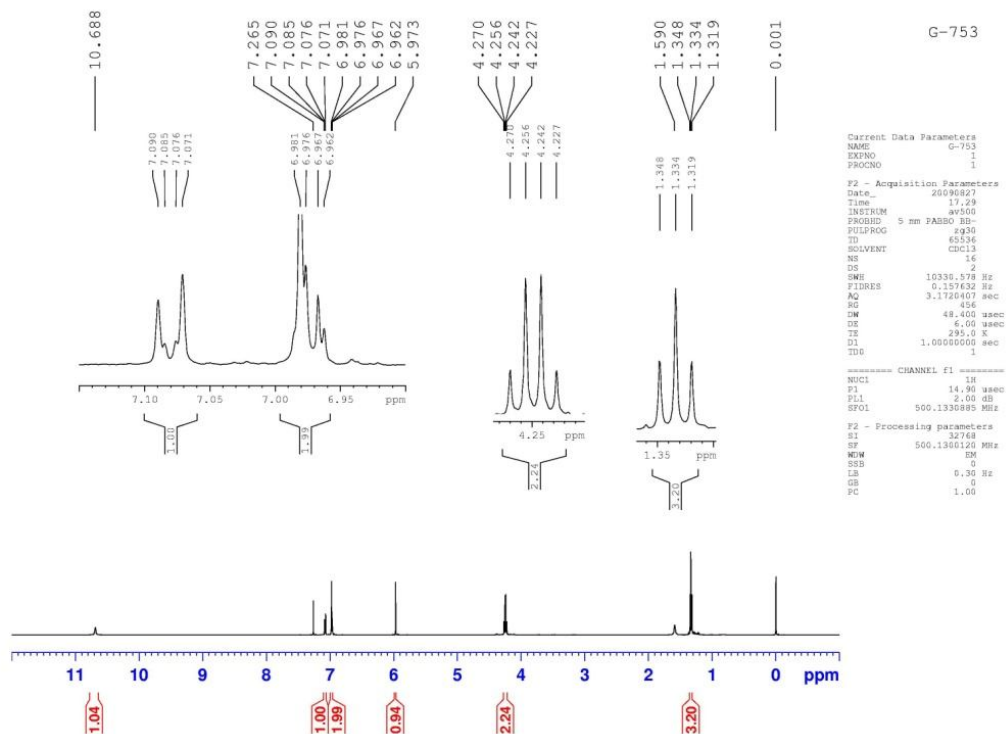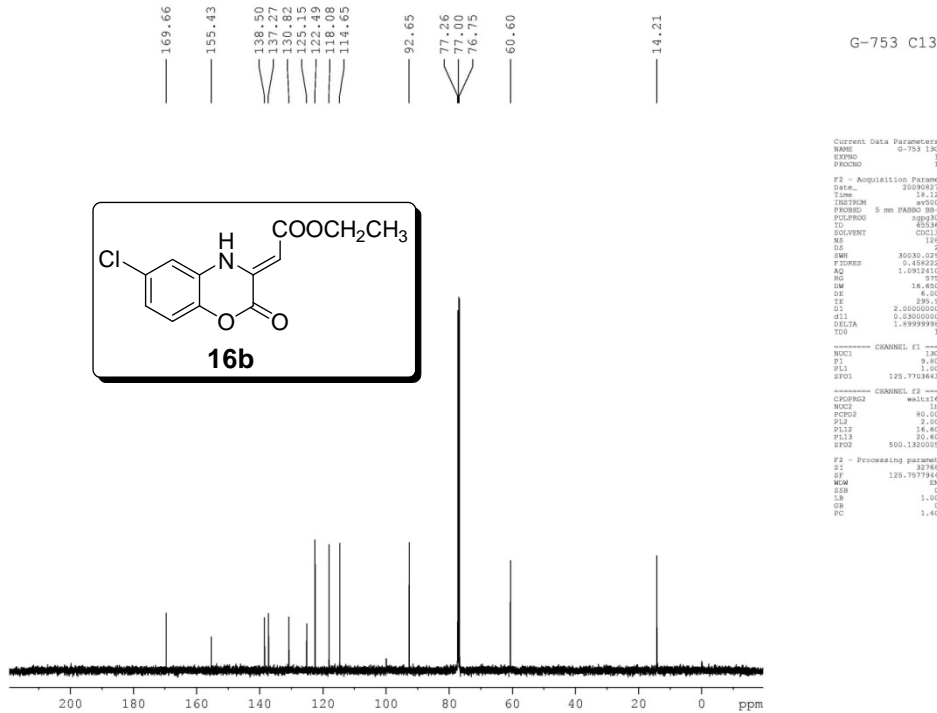

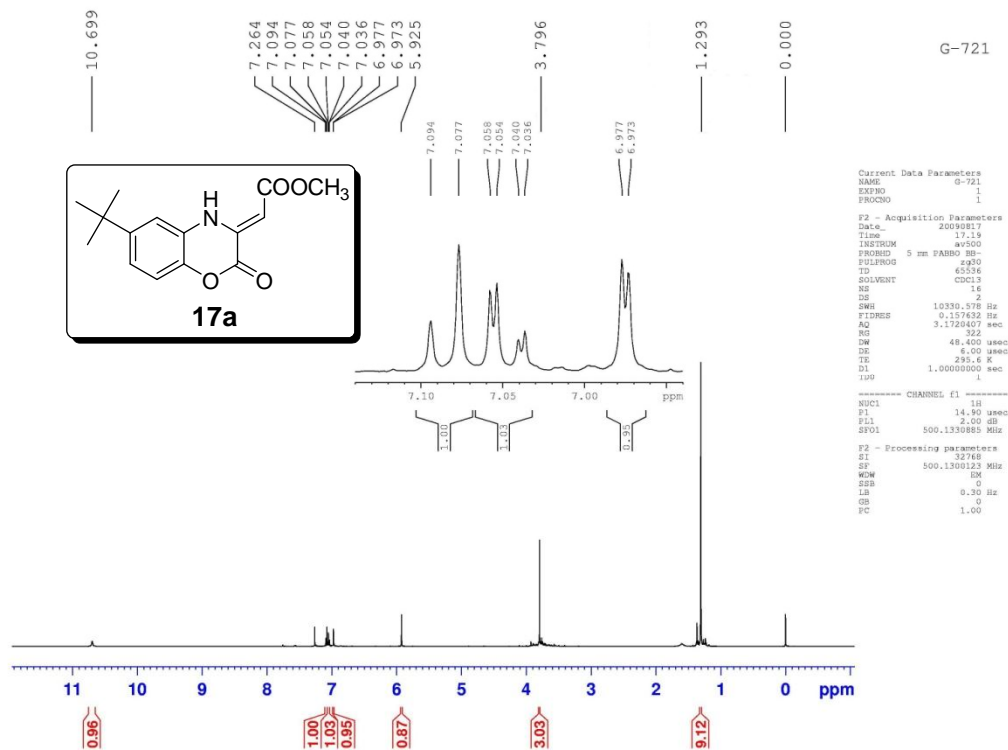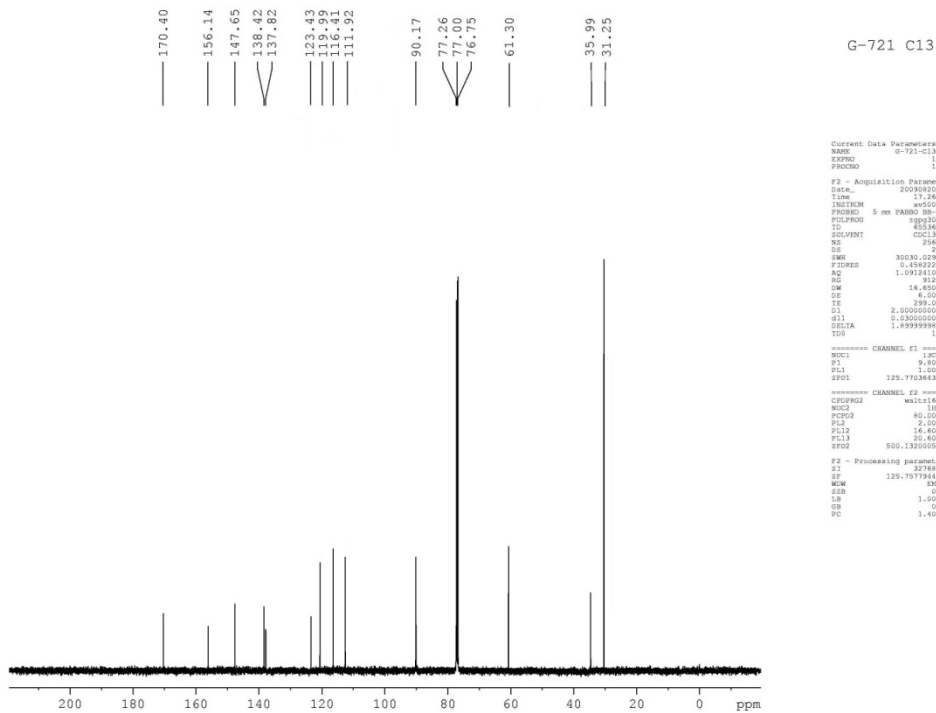

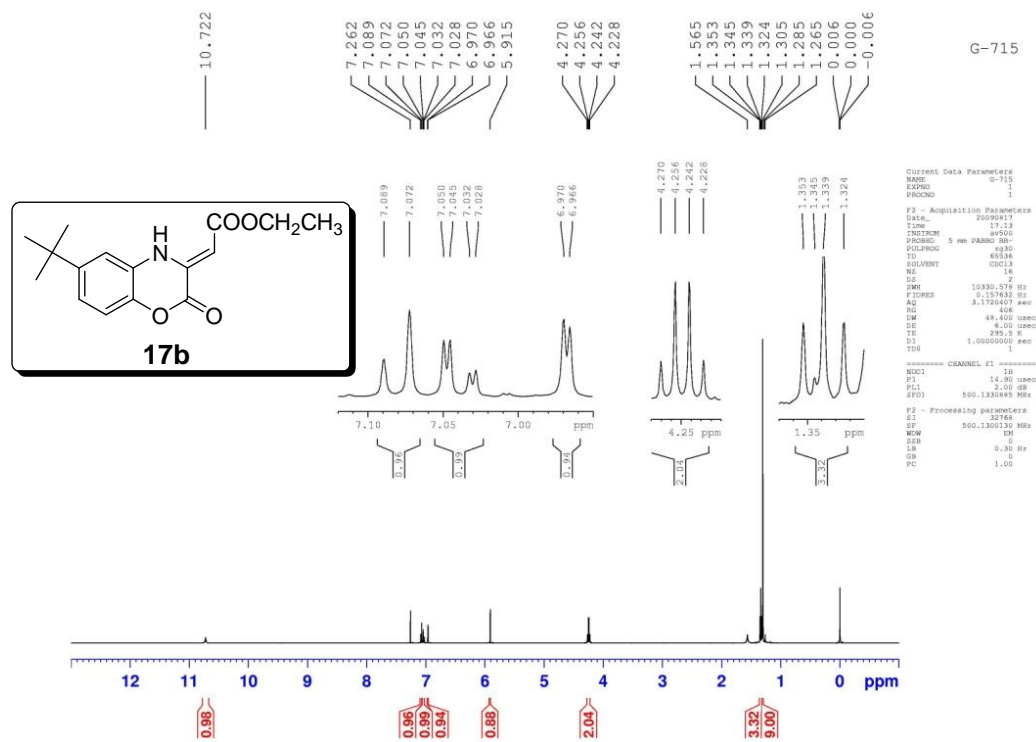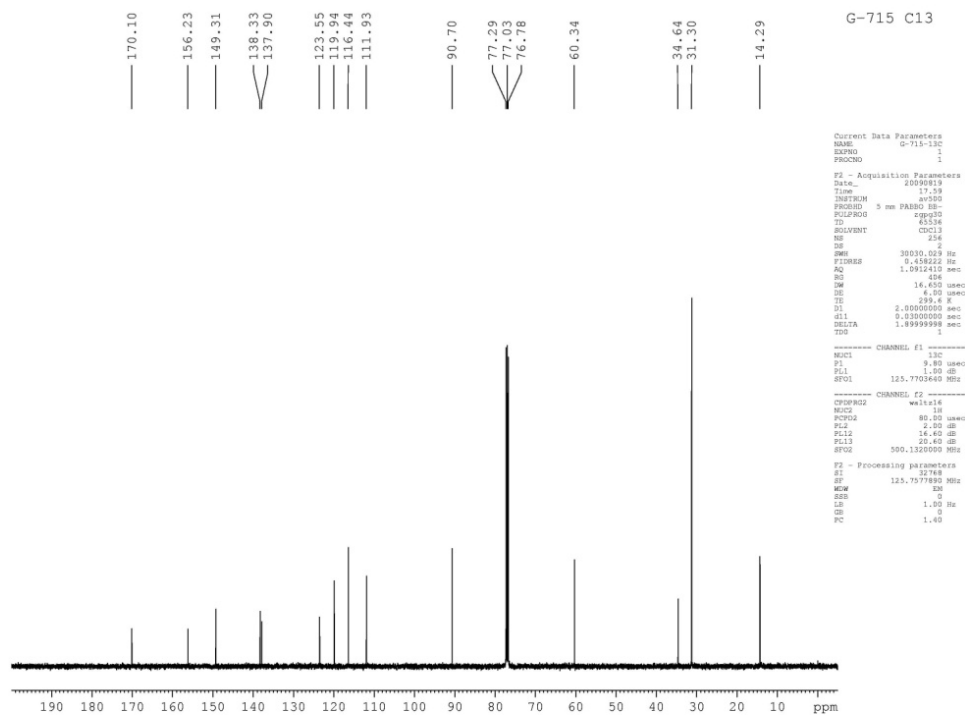

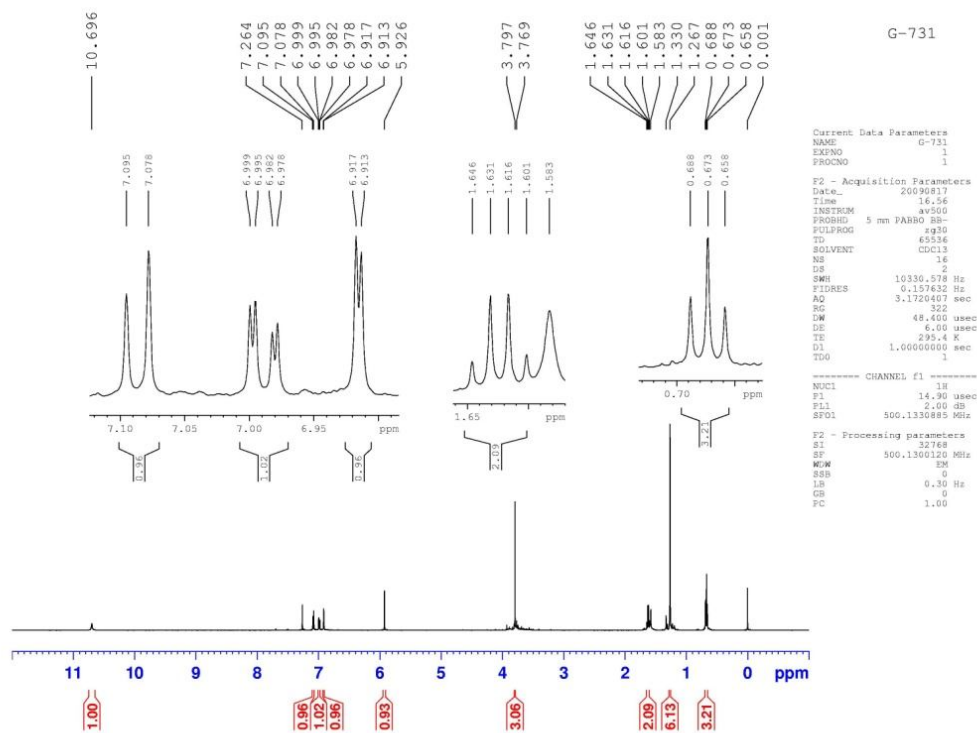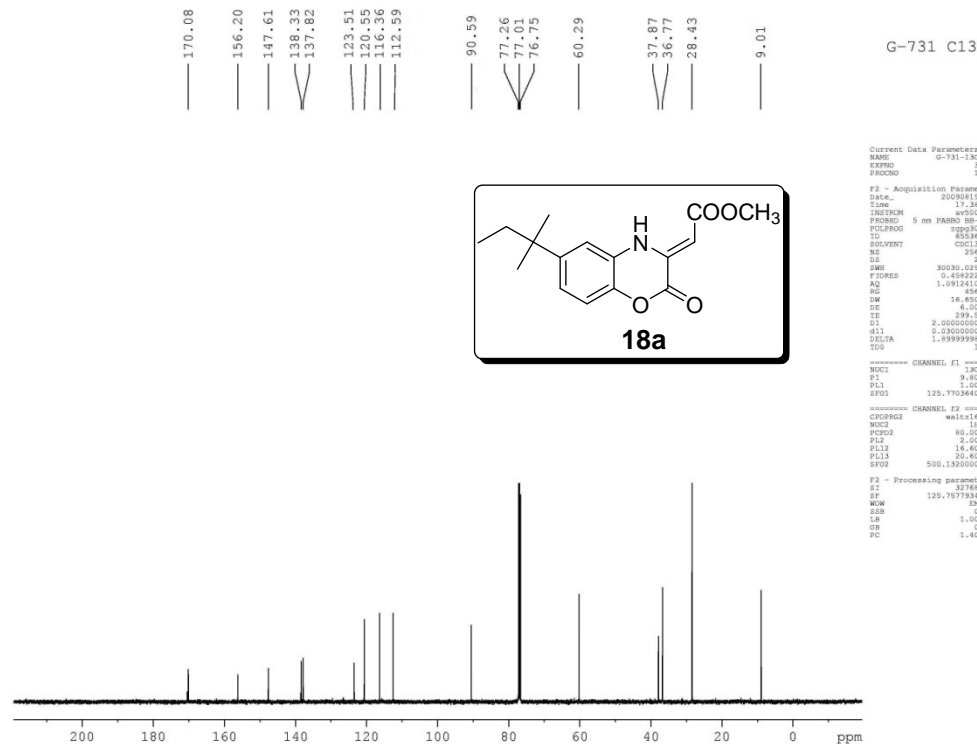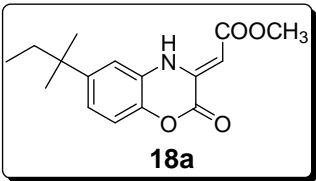

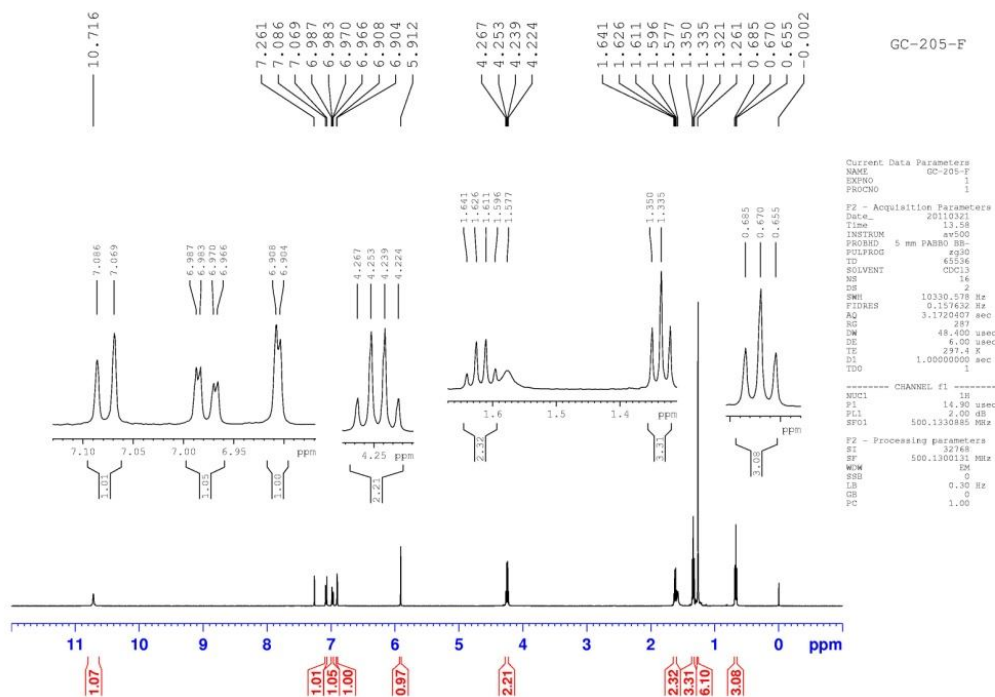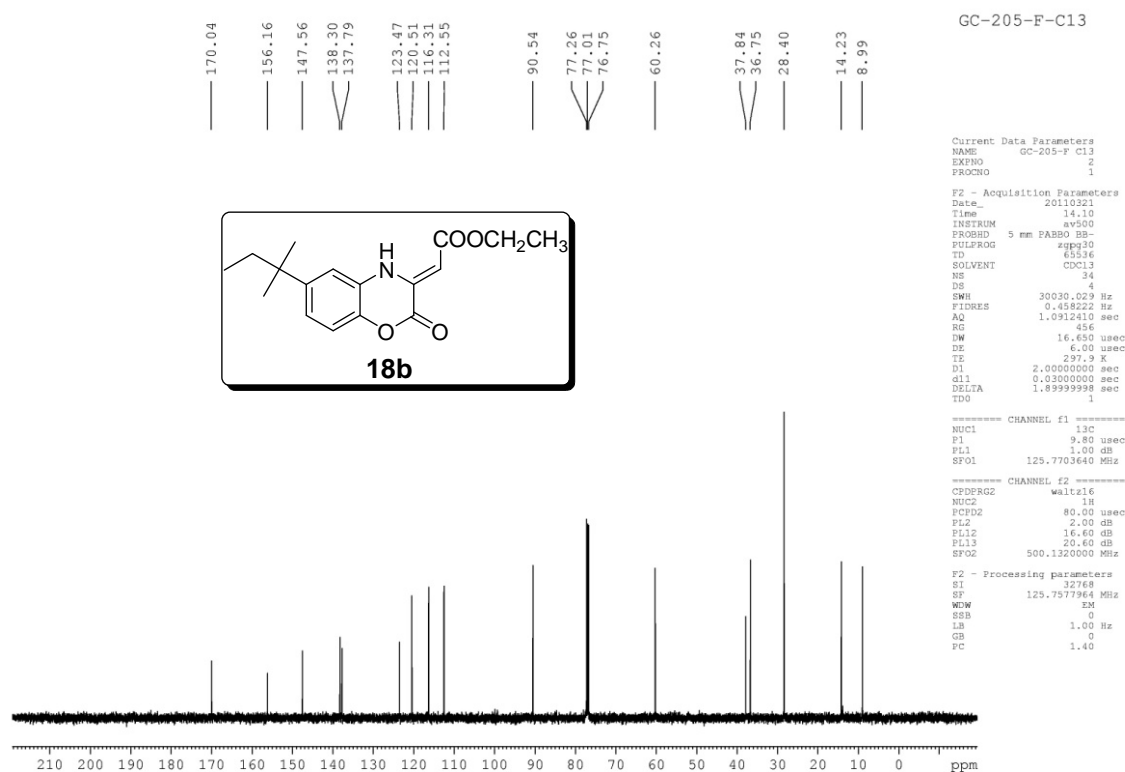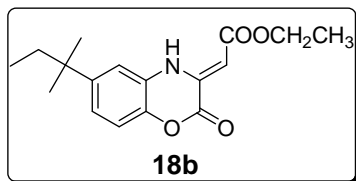

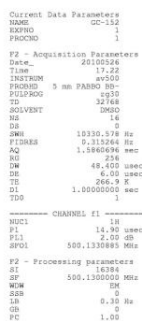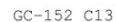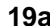

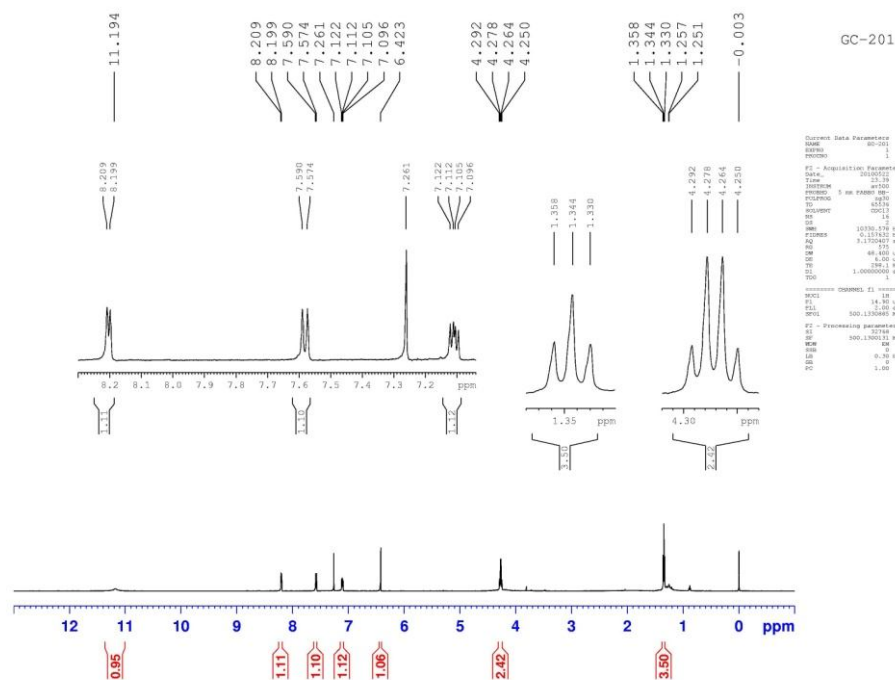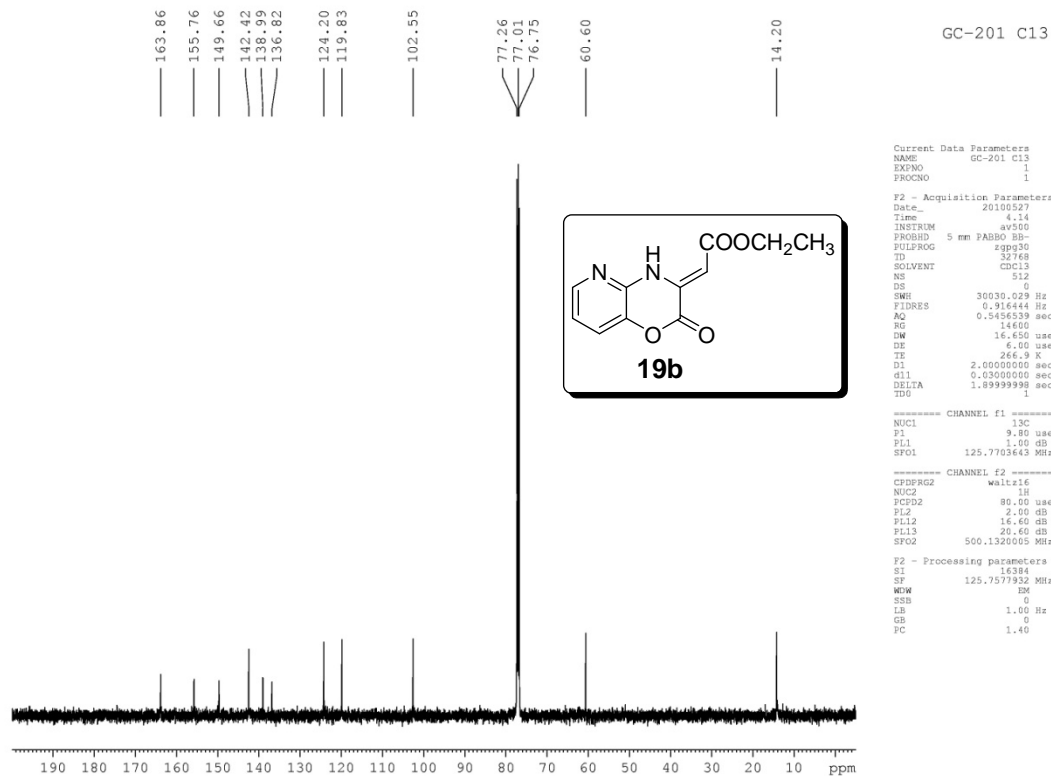

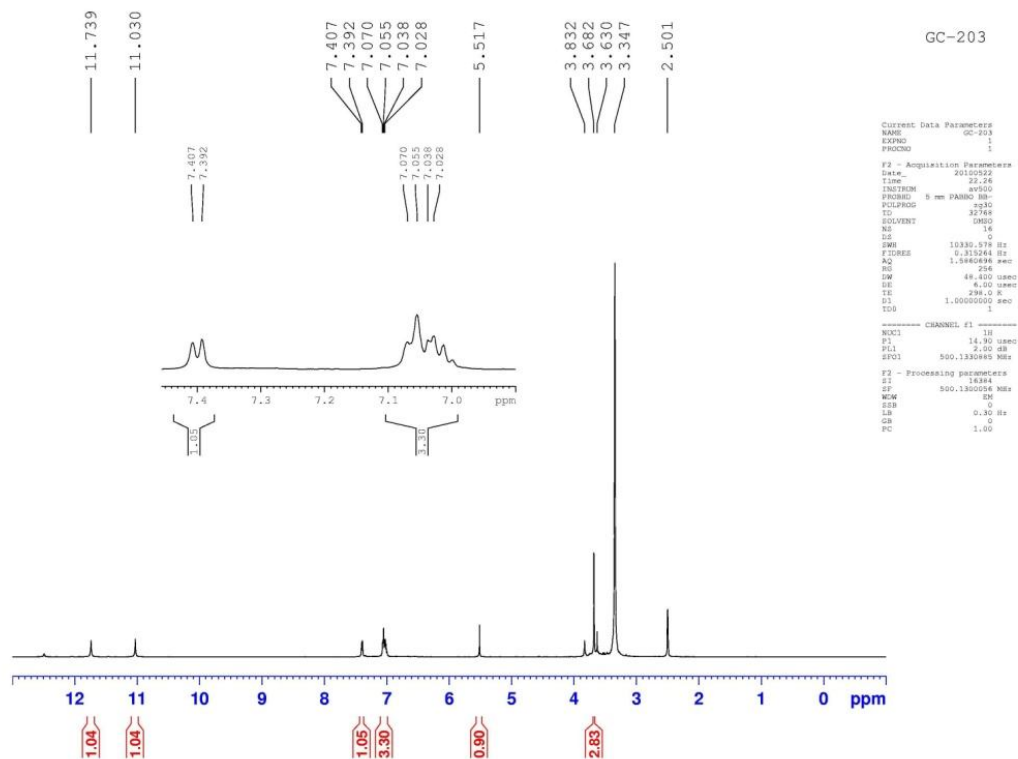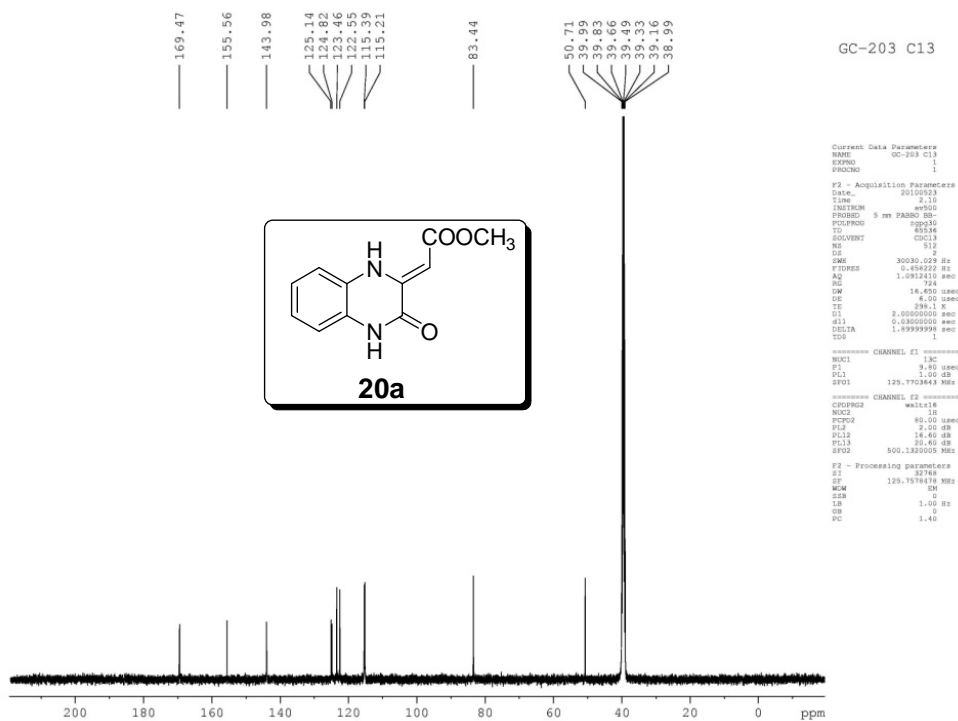

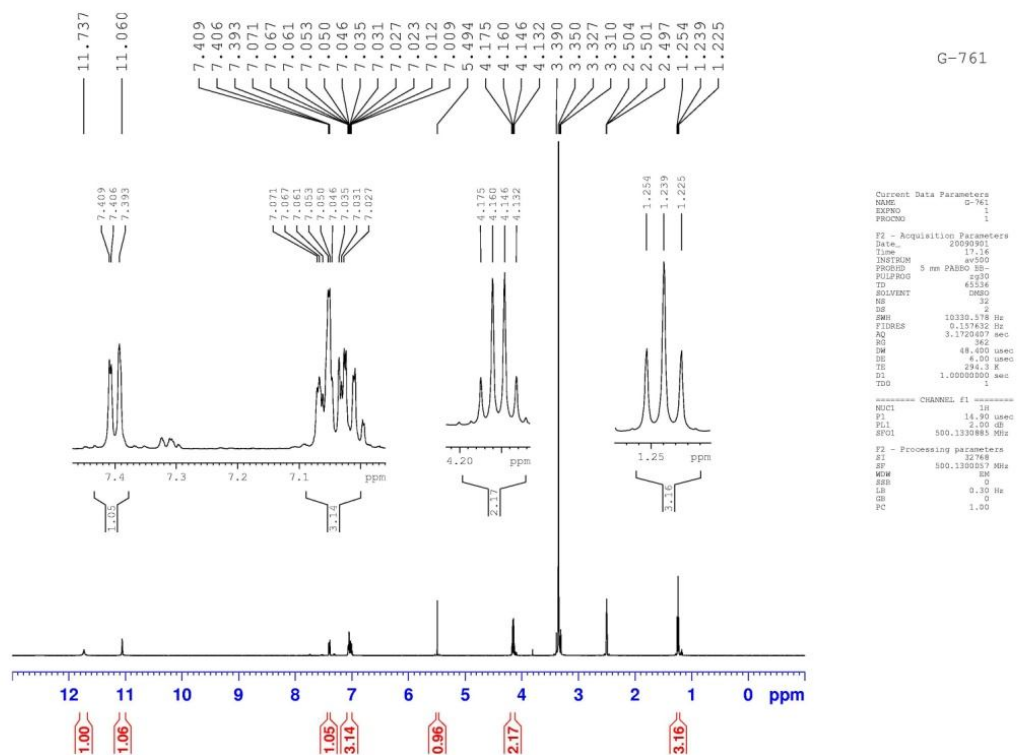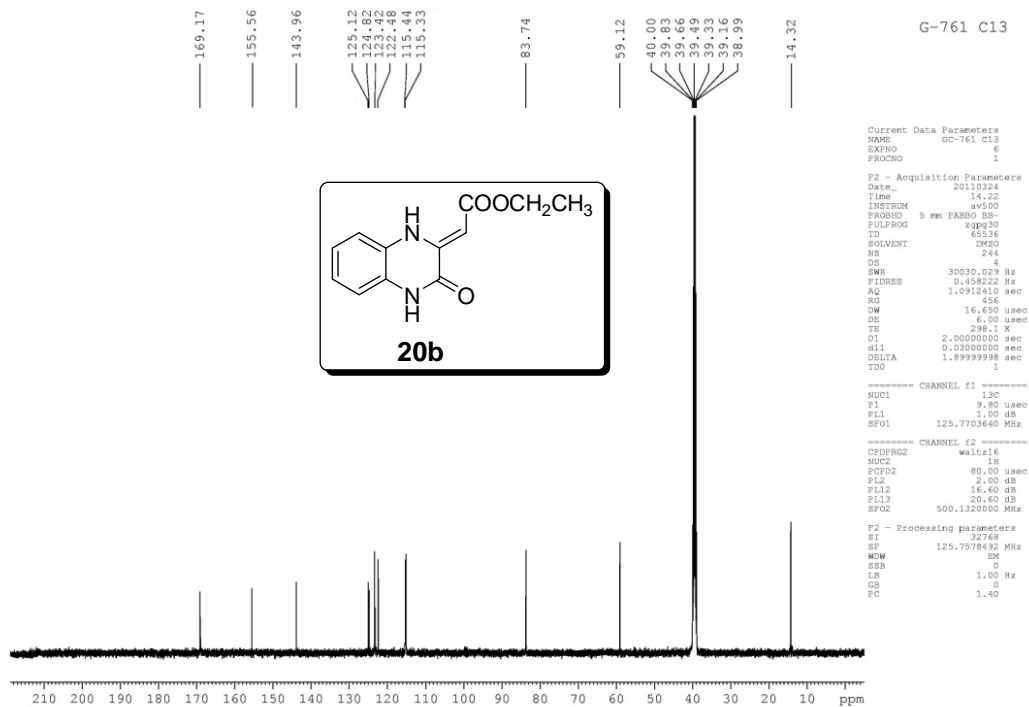

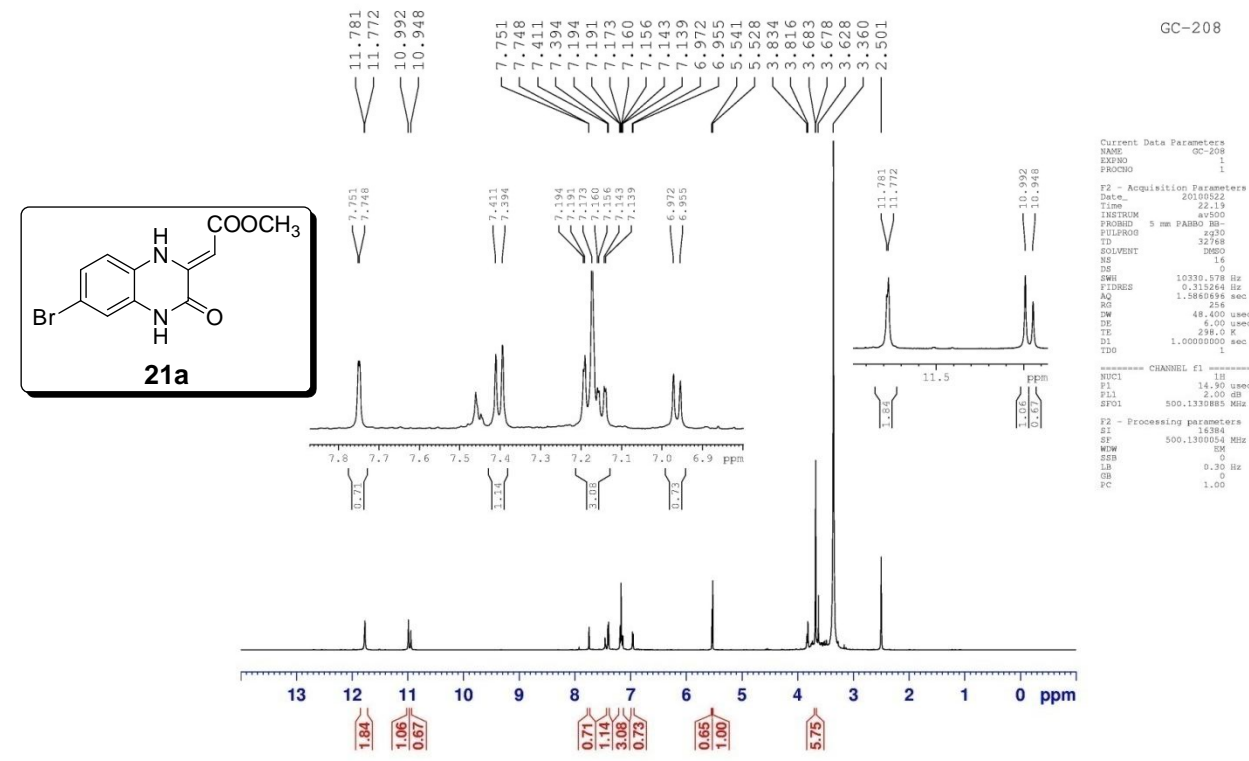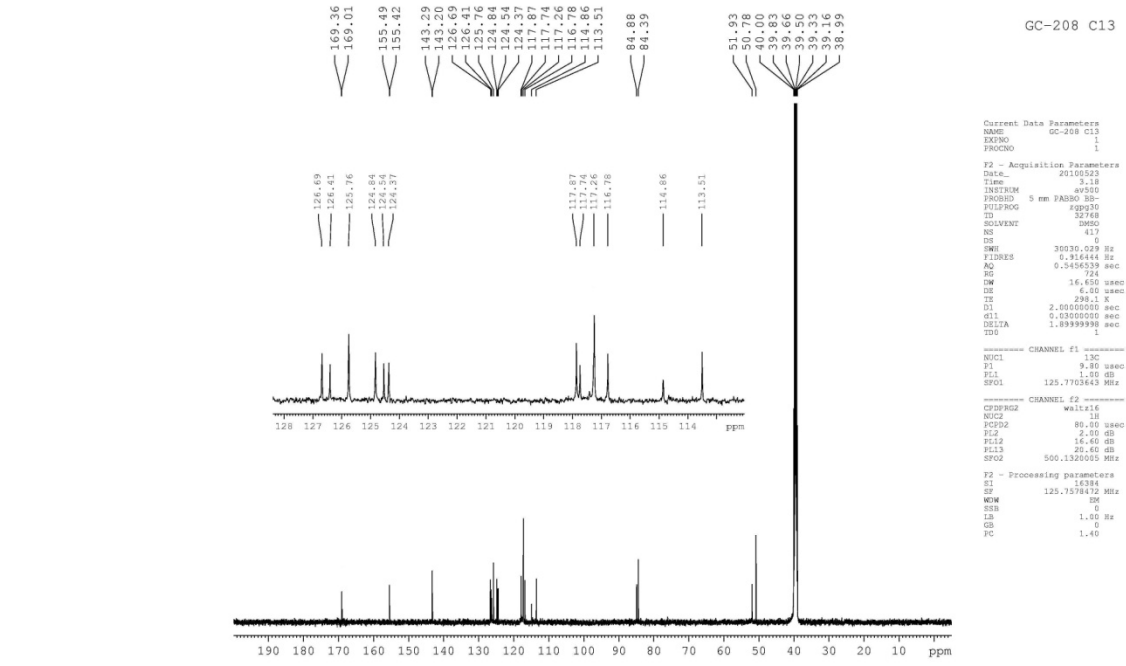

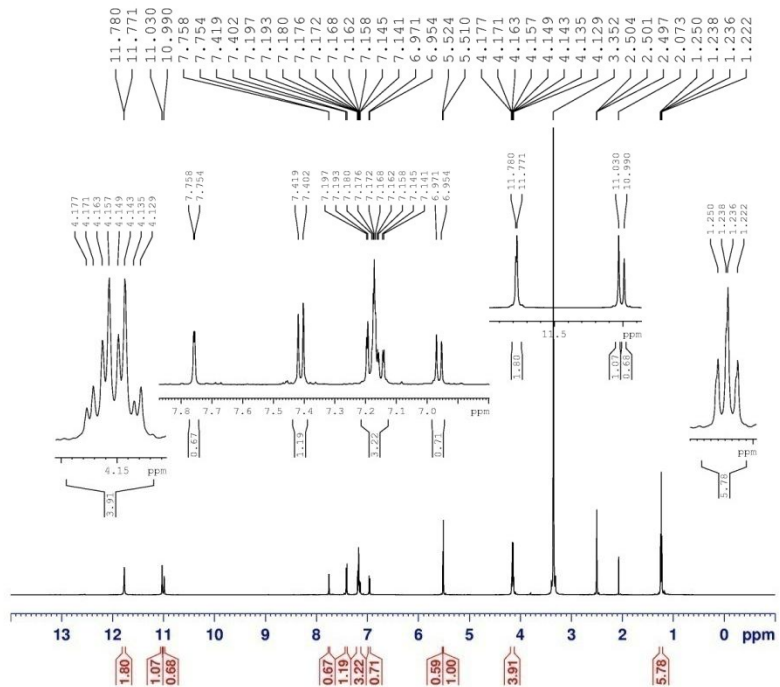

Current Data Parameters  
NAME G-762  
EXPNO 1  
PROCNO 1

F2 - Acquisition Parameters  
Date\_ 20090901  
Time 17.05  
INSTRUM av500  
PROBHD 5 mm PABBO BB-  
PULPROG zgpg30  
ID 65536  
SOLVENT DMSO  
NS 128  
DS 2  
SWH 10230.578 Hz  
FIDRES 0.157632 Hz  
AQ 3.1725407 sec  
RG 322  
DM 48.400 usec  
DE 6.00 usec  
TE 294.4 K  
D1 1.00000000 sec  
TD0 1

===== CHANNEL f1 =====  
NUC1 1H  
P1 14.90 usec  
PL1 2.00 dB  
SFO1 500.1330885 MHz

F2 - Processing parameters  
SI 32768  
SF 500.1330857 MHz  
WDW EM  
SSB 0  
LB 0.30 Hz  
GB 0  
PC 1.00

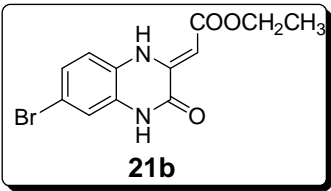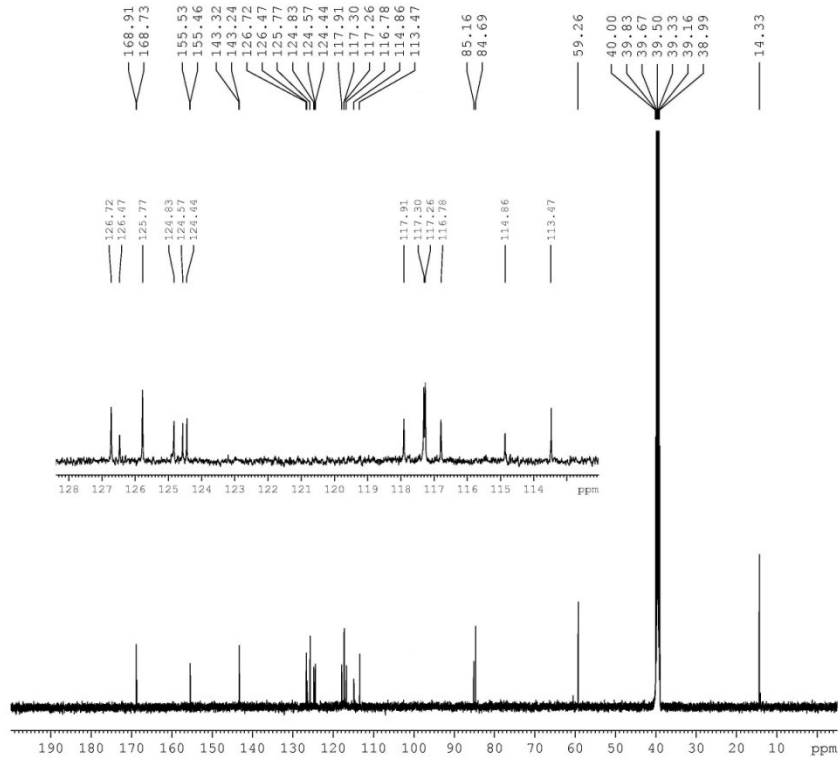

Current Data Parameters  
NAME G-762-C13  
EXPNO 1  
PROCNO 1

F2 - Acquisition Parameters  
Date\_ 20090901  
Time 17.46  
INSTRUM av500  
PROBHD 5 mm PABBO BB-  
PULPROG zgpg30  
ID 65536  
SOLVENT DMSO  
NS 256  
DS 2  
SWH 30030.029 Hz  
FIDRES 0.458222 Hz  
AQ 1.8912412 sec  
RG 1440  
DM 16.650 usec  
DE 6.00 usec  
TE 295.0 K  
D1 2.00000000 sec  
d11 0.03000000 sec  
DELTA 1.99999998 sec  
TD0 1

===== CHANNEL f1 =====  
NUC1 13C  
P1 9.80 usec  
PL1 1.00 dB  
SFO1 125.7703643 MHz

===== CHANNEL f2 =====  
CPDPRG2 waltz16  
NUC2 1H  
PCPD2 80.00 usec  
PL2 2.00 dB  
PL12 16.40 dB  
PL13 20.40 dB  
SFO2 500.1320005 MHz

F2 - Processing parameters  
SI 32768  
SF 125.7578461 MHz  
WDW EM  
SSB 0  
LB 1.00 Hz  
GB 0  
PC 1.40

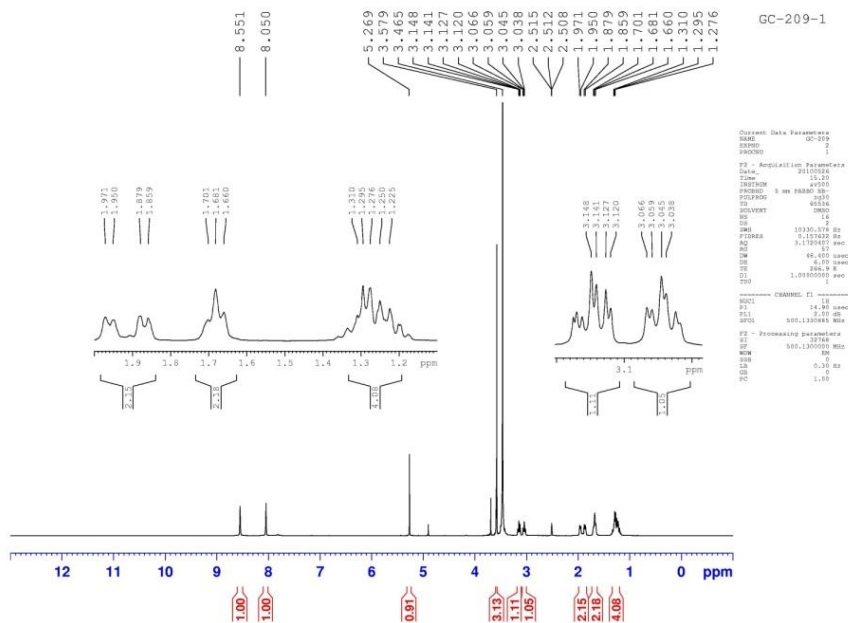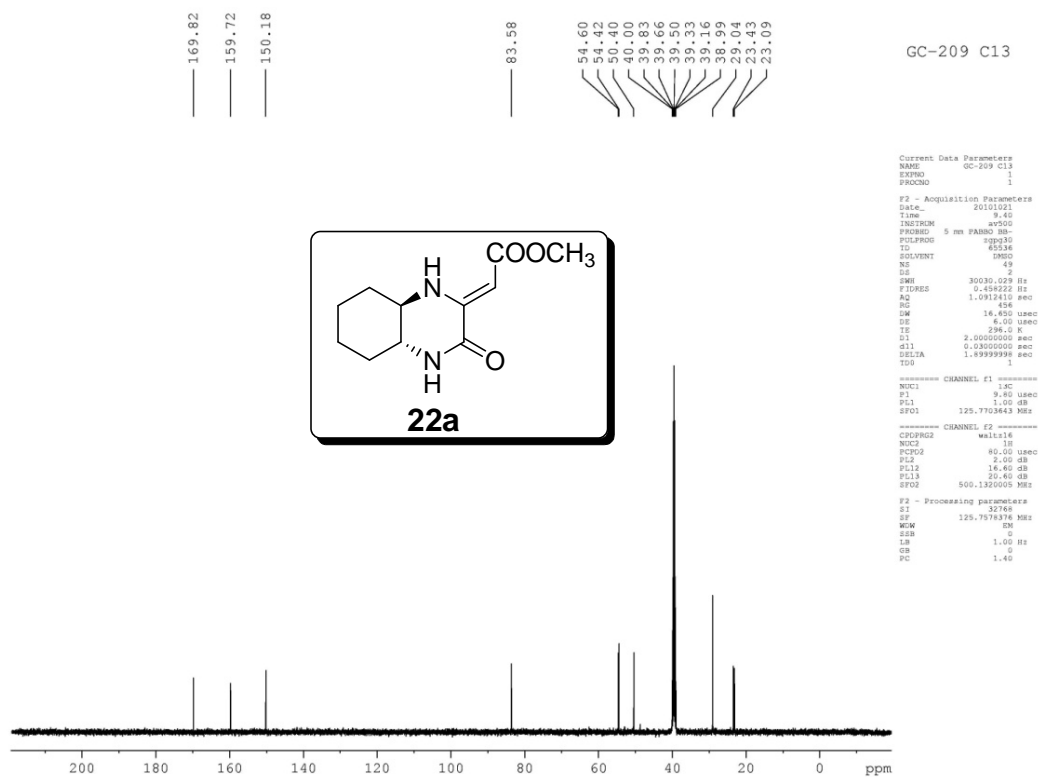

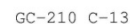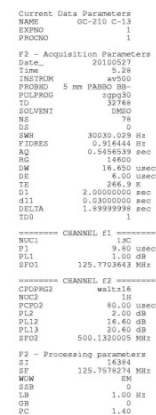

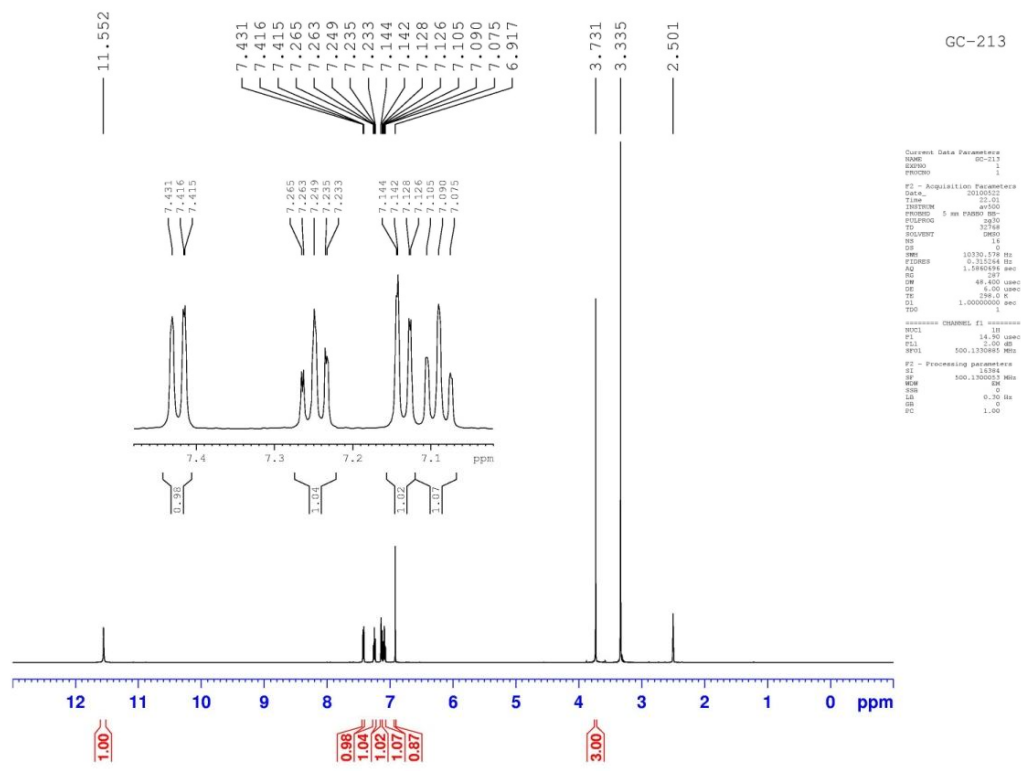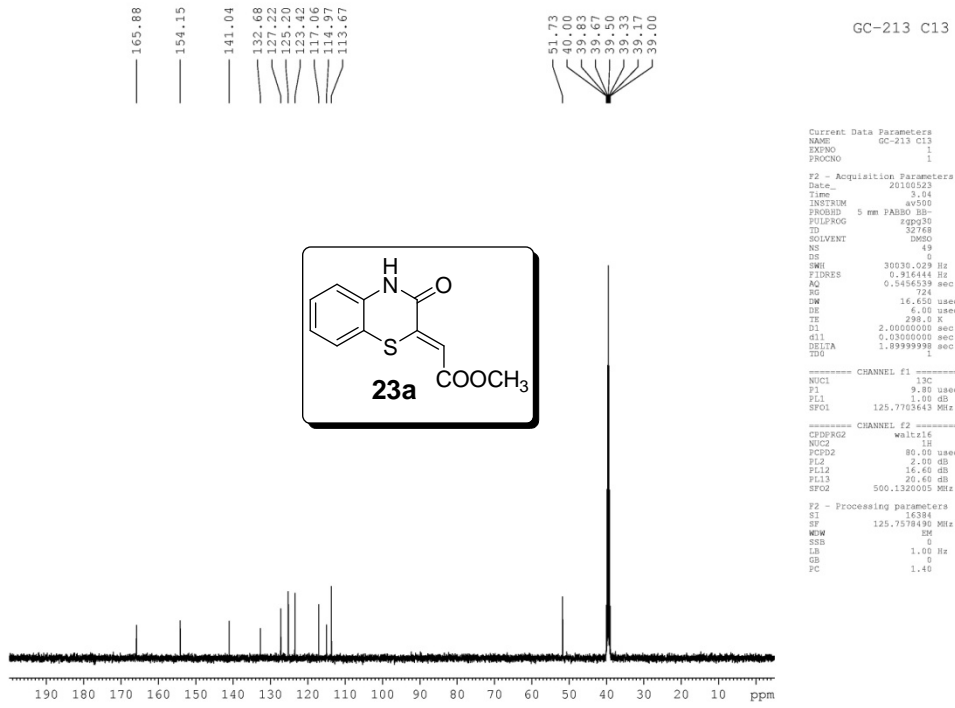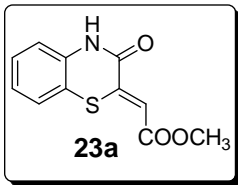

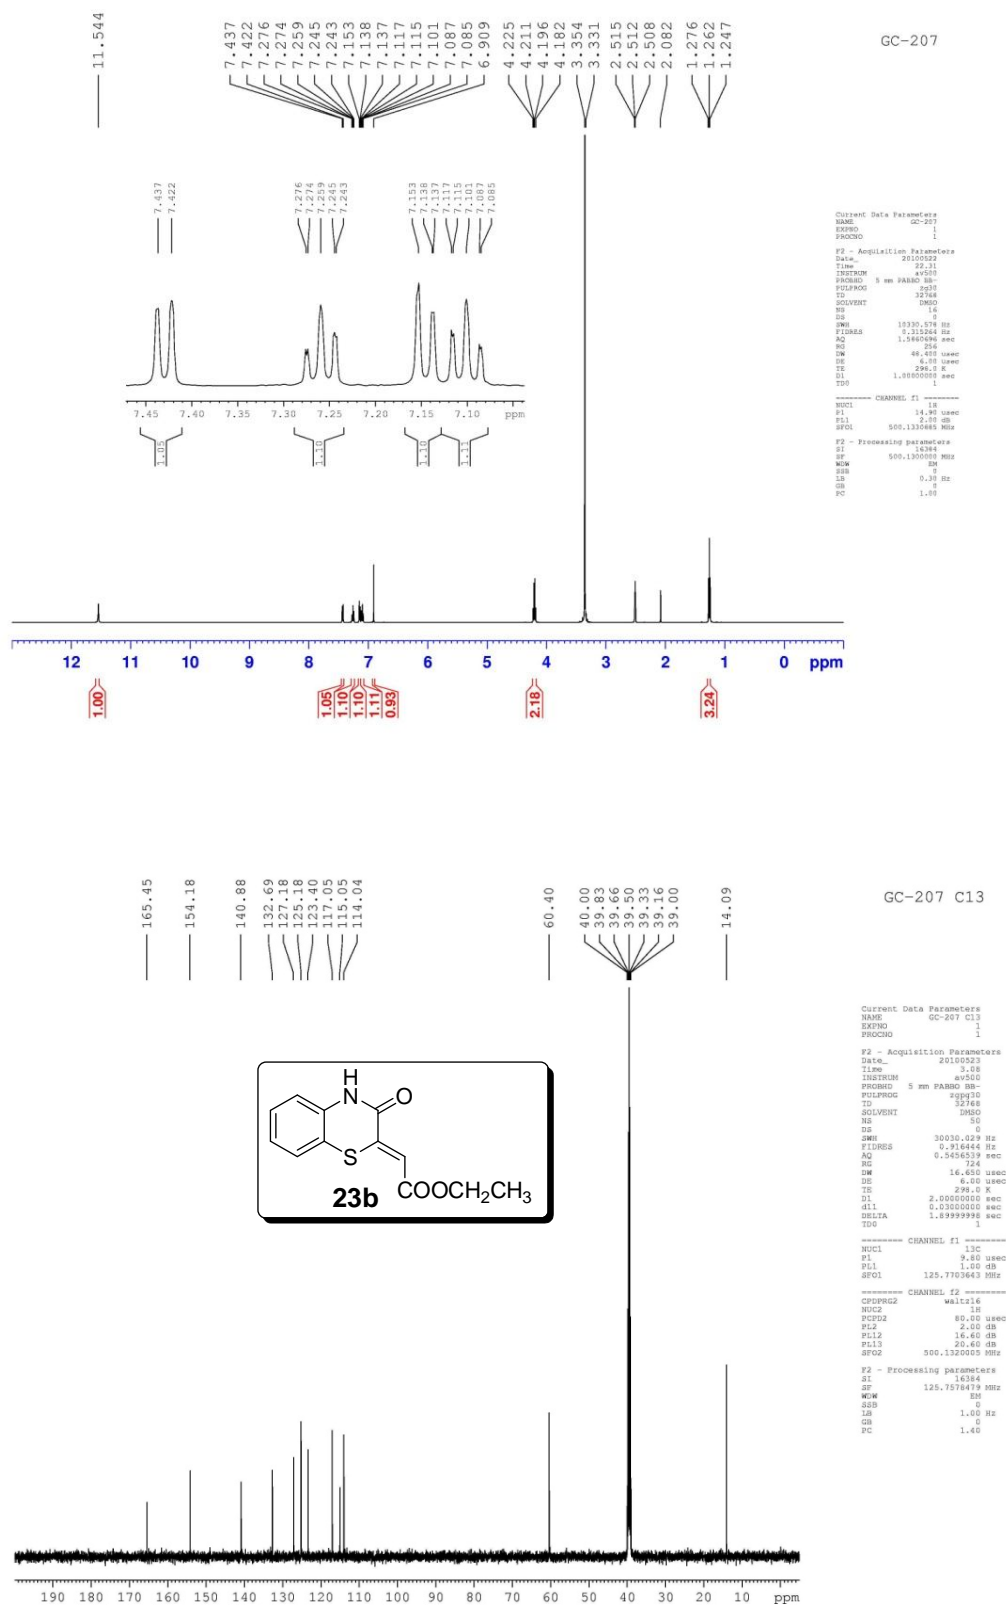

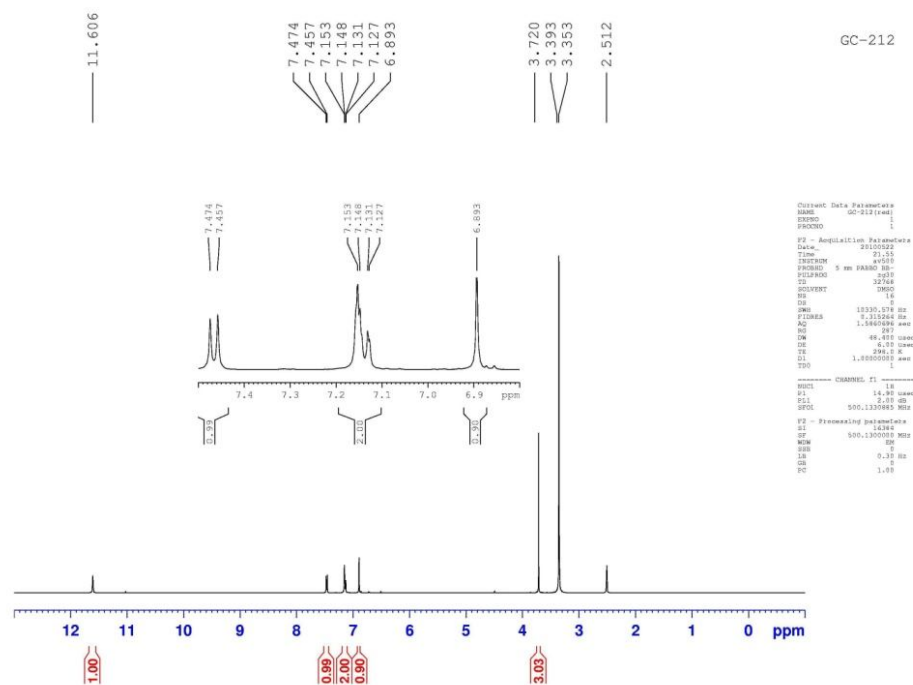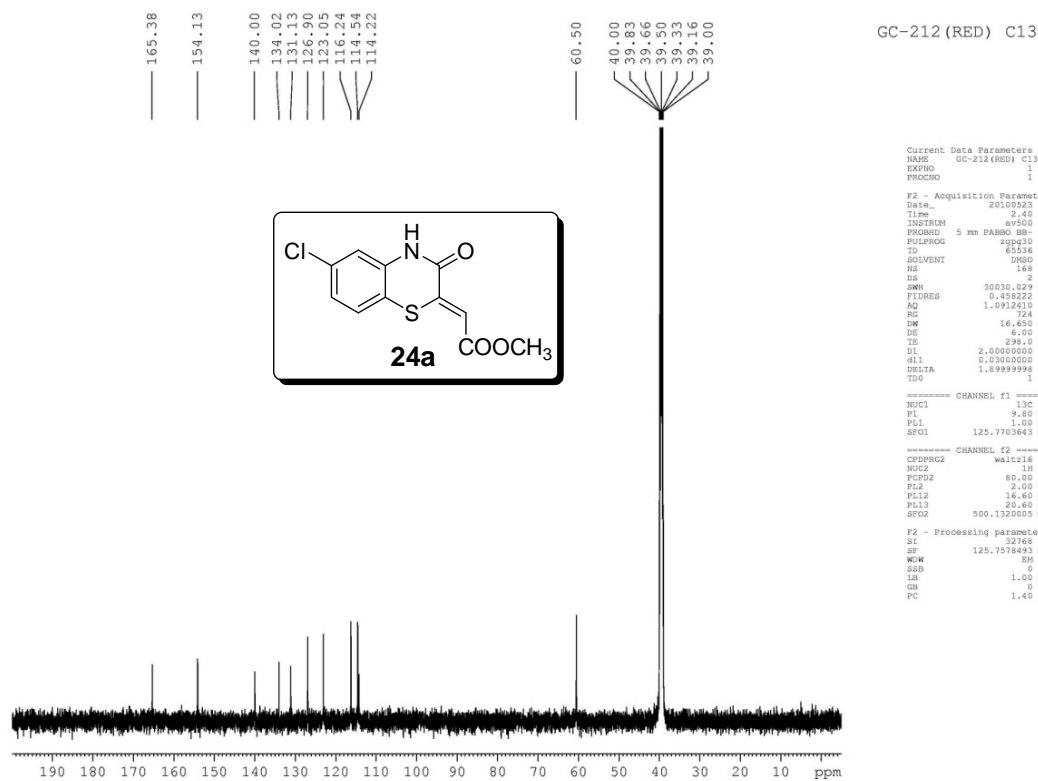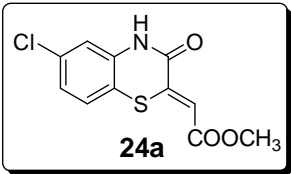

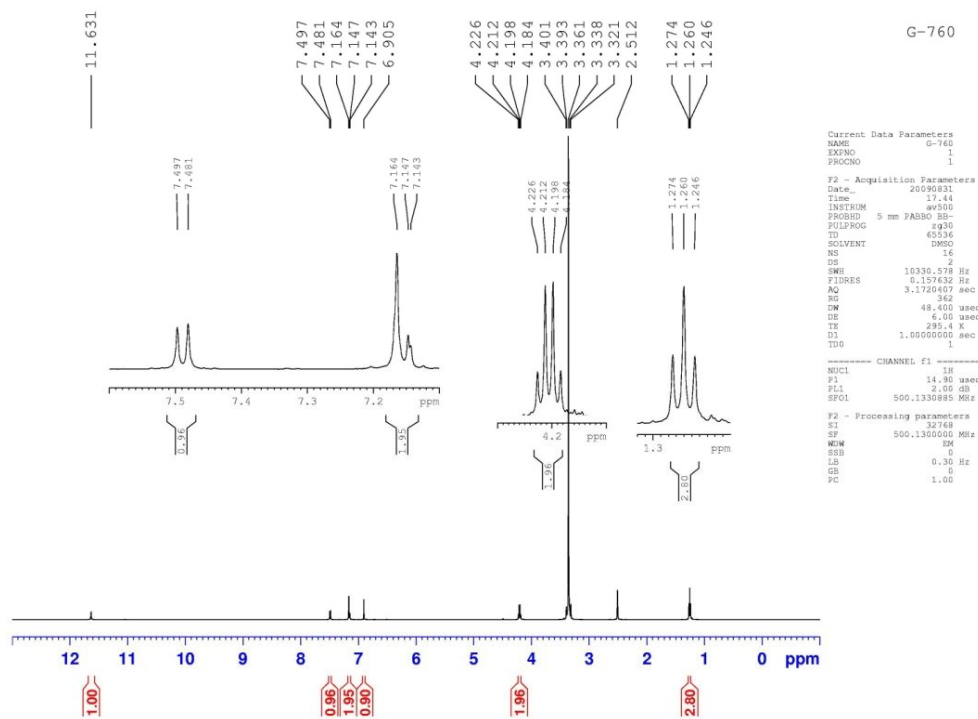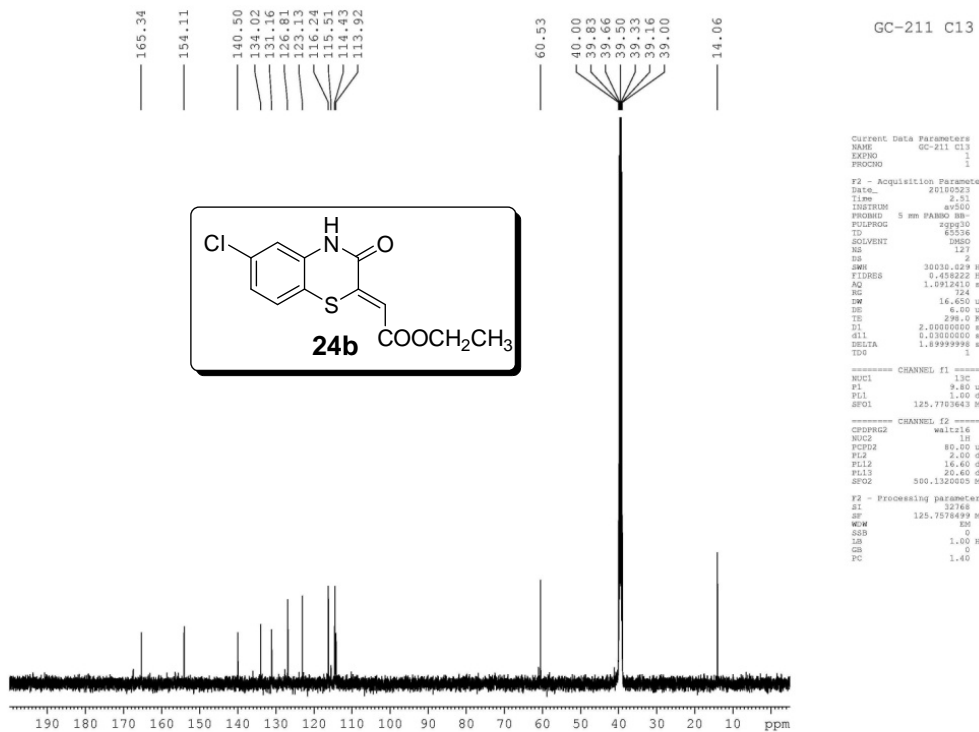

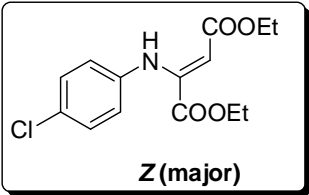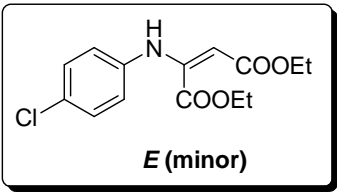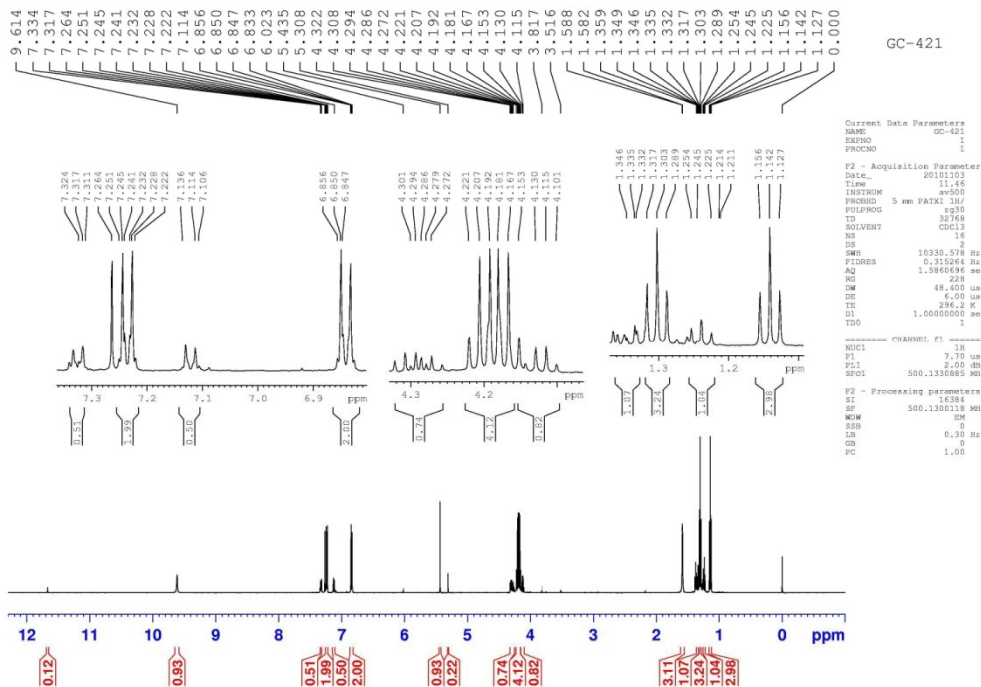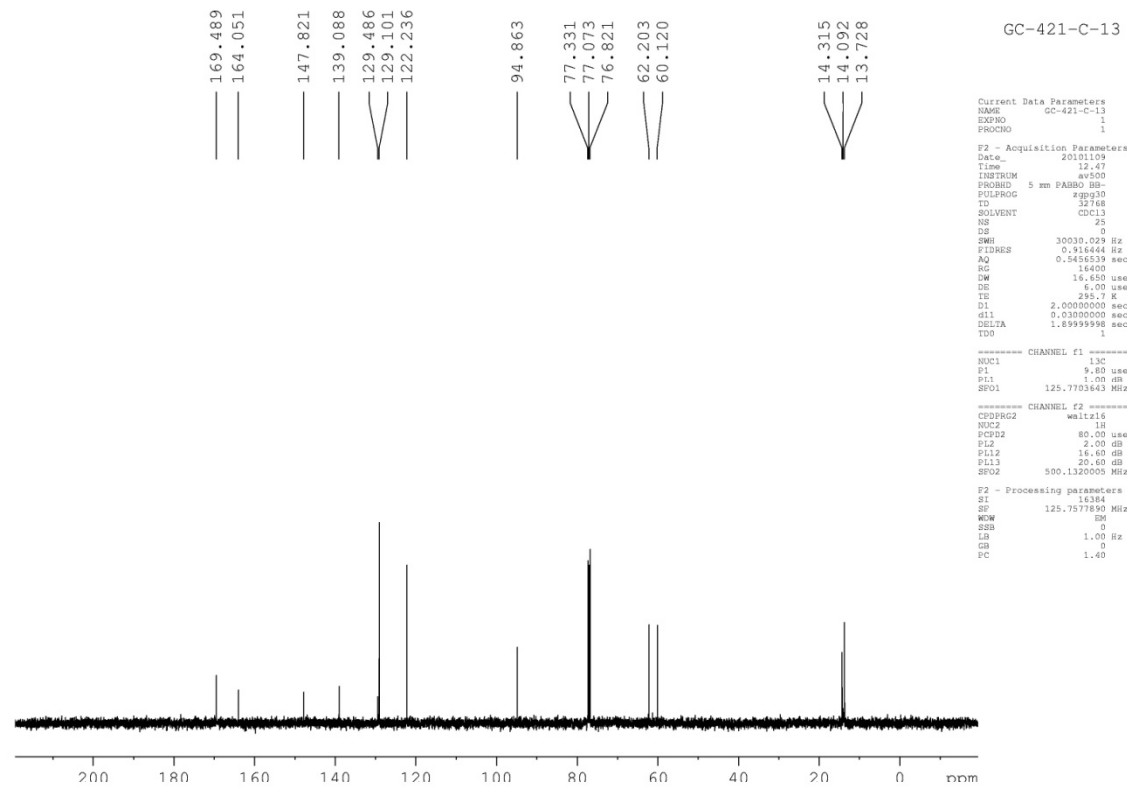

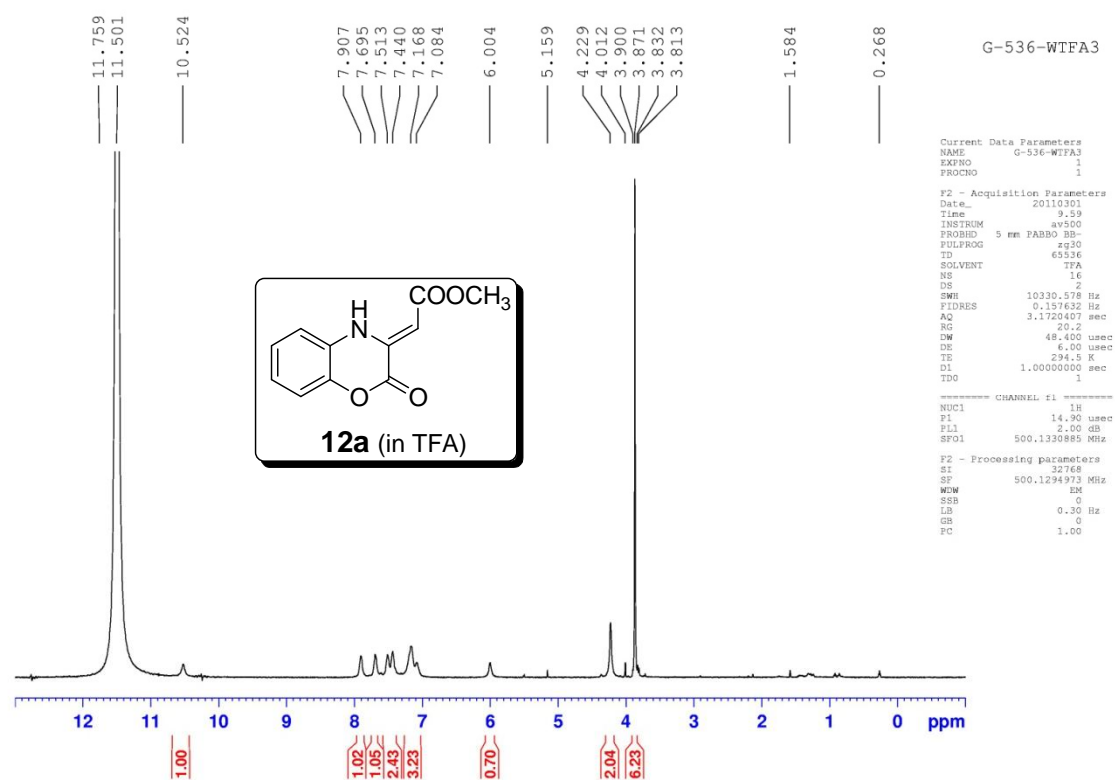

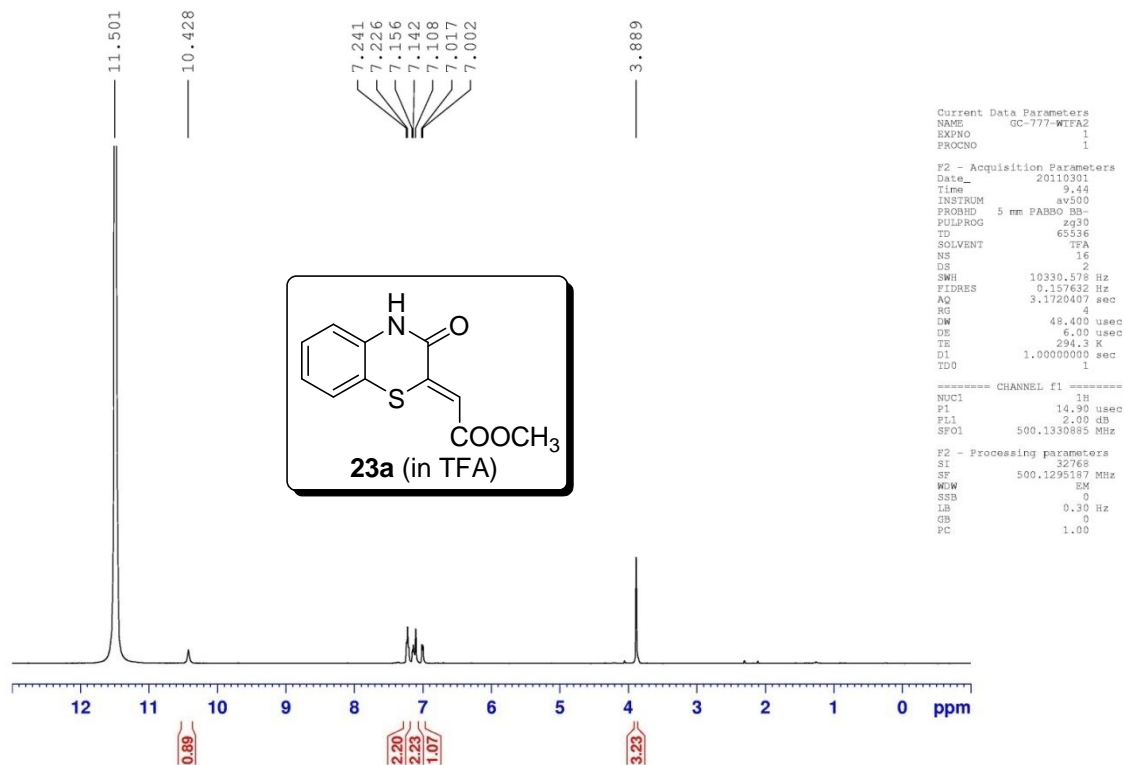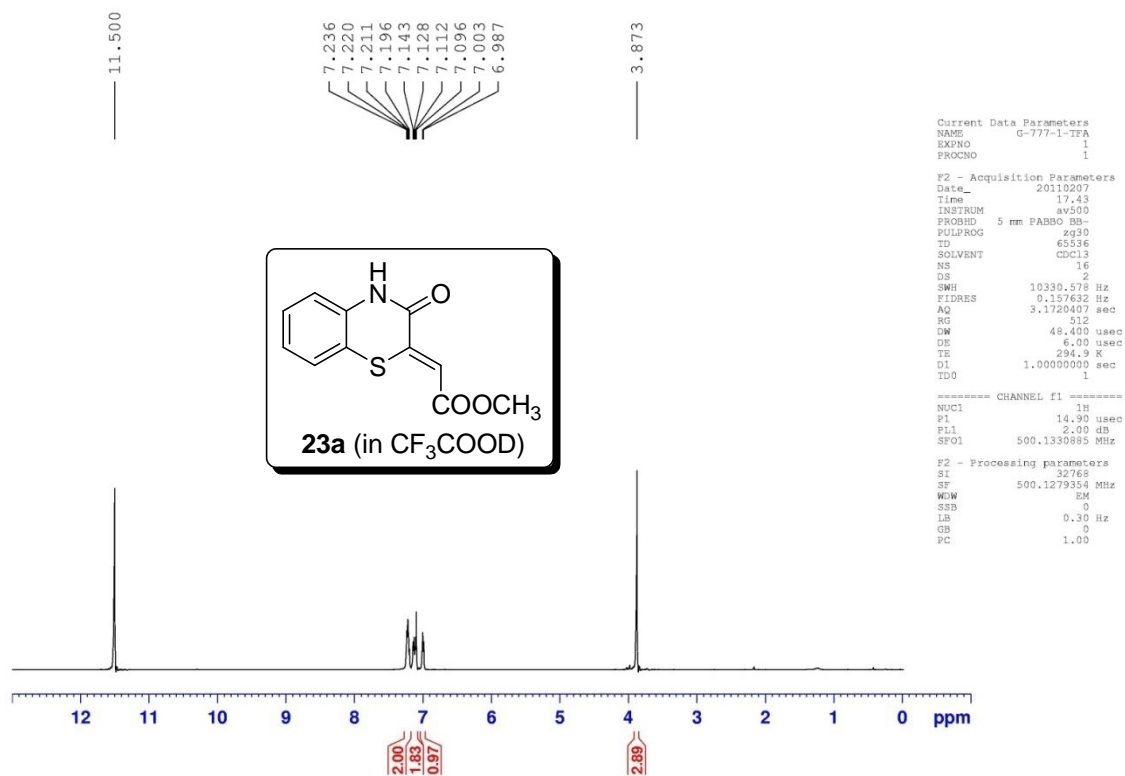

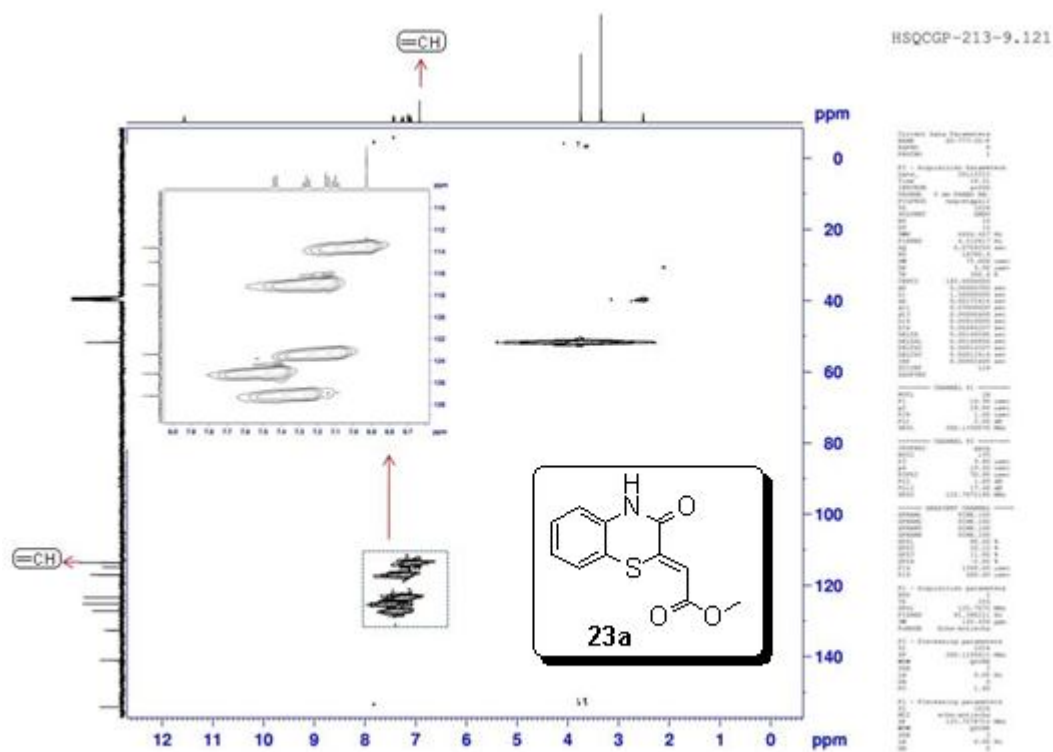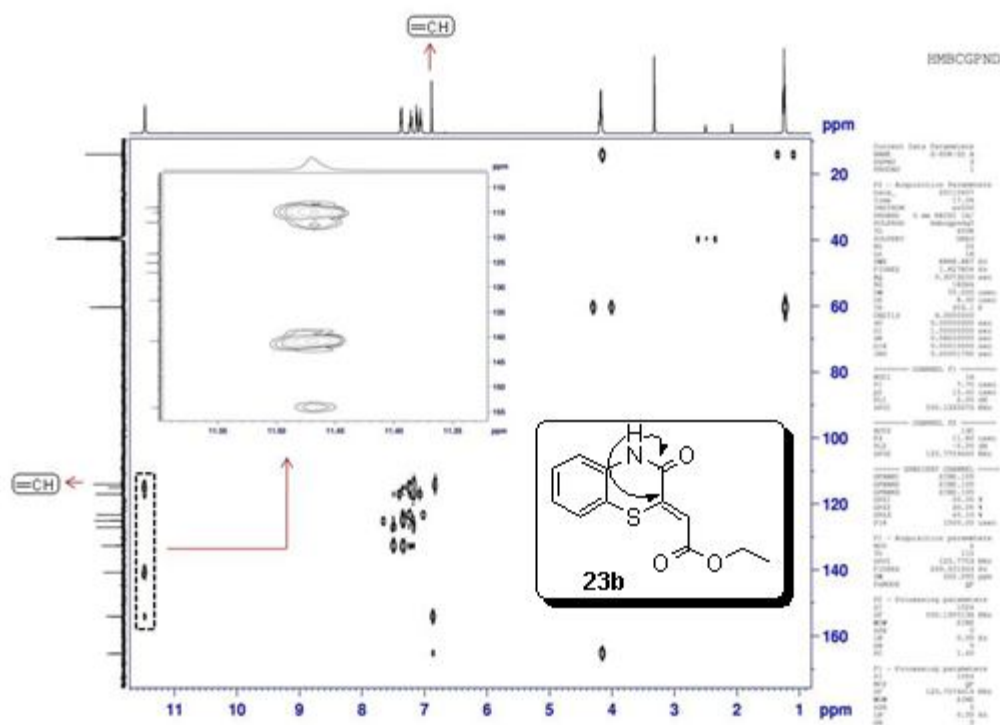

Supplement: c1gc15701a_2.pdf [file c1gc15701a_2.pdf]
